# Supplementary material for: Scoping review on Physical Health Conditions in Irish Travellers (Mincéiri)
Source: PubMed Central journal article supplement — BMJ Open. 2023 Aug 28;13(8):e068876. doi: 10.1136/bmjopen-2022-068876 (PMC10462949; doi:10.1136/bmjopen-2022-068876), 2023-08-28
Supplement: bmjopen-2022-068876.draft_revisions.pdf [file bmjopen-2022-068876.draft_revisions.pdf]

# BMJ Open

BMJ Open is committed to open peer review. As part of this commitment we make the peer review history of every article we publish publicly available.

When an article is published we post the peer reviewers' comments and the authors' responses online. We also post the versions of the paper that were used during peer review. These are the versions that the peer review comments apply to.

The versions of the paper that follow are the versions that were submitted during the peer review process. They are not the versions of record or the final published versions. They should not be cited or distributed as the published version of this manuscript.

BMJ Open is an open access journal and the full, final, typeset and author-corrected version of record of the manuscript is available on our site with no access controls, subscription charges or pay-per-view fees (<http://bmjopen.bmj.com>).

If you have any questions on BMJ Open's open peer review process please email [info.bmjopen@bmj.com](mailto:info.bmjopen@bmj.com)

# BMJ Open

## Scoping review on Physical Health Conditions in Mincéirs - Irish Travellers

|                               |                                                                                                                                                                                                                                                                                             |
|-------------------------------|---------------------------------------------------------------------------------------------------------------------------------------------------------------------------------------------------------------------------------------------------------------------------------------------|
| Journal:                      | <i>BMJ Open</i>                                                                                                                                                                                                                                                                             |
| Manuscript ID                 | bmjopen-2022-068876                                                                                                                                                                                                                                                                         |
| Article Type:                 | Original research                                                                                                                                                                                                                                                                           |
| Date Submitted by the Author: | 20-Oct-2022                                                                                                                                                                                                                                                                                 |
| Complete List of Authors:     | Kennedy, Fiona; Trinity College Dublin, School of Medicine<br>Ward, Amy; Independent Public and Patient Expert<br>Mockler, David; Trinity College Dublin, John Stearne Library<br>Villani, Jacopo; Health Service Executive<br>Broderick, Julie; Trinity College Dublin, School of Medicine |
| Keywords:                     | PUBLIC HEALTH, PRIMARY CARE, Coronary heart disease < CARDIOLOGY                                                                                                                                                                                                                            |
|                               |                                                                                                                                                                                                                                                                                             |

SCHOLARONE™  
Manuscripts

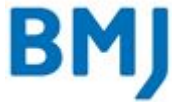

I, the Submitting Author has the right to grant and does grant on behalf of all authors of the Work (as defined in the below author licence), an exclusive licence and/or a non-exclusive licence for contributions from authors who are: i) UK Crown employees; ii) where BMJ has agreed a CC-BY licence shall apply, and/or iii) in accordance with the terms applicable for US Federal Government officers or employees acting as part of their official duties; on a worldwide, perpetual, irrevocable, royalty-free basis to BMJ Publishing Group Ltd ("BMJ") its licensees and where the relevant Journal is co-owned by BMJ to the co-owners of the Journal, to publish the Work in this journal and any other BMJ products and to exploit all rights, as set out in our [licence](#).

The Submitting Author accepts and understands that any supply made under these terms is made by BMJ to the Submitting Author unless you are acting as an employee on behalf of your employer or a postgraduate student of an affiliated institution which is paying any applicable article publishing charge ("APC") for Open Access articles. Where the Submitting Author wishes to make the Work available on an Open Access basis (and intends to pay the relevant APC), the terms of reuse of such Open Access shall be governed by a Creative Commons licence – details of these licences and which [Creative Commons](#) licence will apply to this Work are set out in our licence referred to above.

Other than as permitted in any relevant BMJ Author's Self Archiving Policies, I confirm this Work has not been accepted for publication elsewhere, is not being considered for publication elsewhere and does not duplicate material already published. I confirm all authors consent to publication of this Work and authorise the granting of this licence.

1  
2  
3 **Title page**  
4

5 **Title: Scoping review on Physical Health Conditions in Mincéirs - Irish Travellers**  
6  
7

8 **Author and co-author names:**  
9

10 Kennedy F<sup>1</sup>, Ward A<sup>2</sup>, Mockler D<sup>3</sup>, Villani J<sup>4</sup>, Broderick J<sup>1</sup>,  
11  
12

13 <sup>1</sup>School of Medicine, Trinity College Dublin, Ireland.  
14

15 <sup>2</sup>Independant Public and Patient Expert, Belfast, UK.  
16  
17

18 <sup>3</sup>John Stern Library, Trinity College Dublin, Ireland.  
19

20 <sup>4</sup>Health Service Executive, Dublin, Ireland.  
21  
22  
23  
24  
25

26 **Corresponding author details:**  
27

28 Name: Dr. Julie Broderick,  
29

30 Address: Trinity Centre for Health Sciences, St. James's Hospital, Dublin D08W9RT, Ireland  
31  
32

33 E-mail: [broderju@tcd.ie](mailto:broderju@tcd.ie)  
34  
35

36 Telephone: +353 1 8962110  
37

38 Fax number: no fax  
39  
40  
41  
42

43 **Keywords:** Irish travellers, physical health, Ethnic minority, inequality  
44  
45

46 **Word count:** 2547  
47  
48  
49  
50  
51  
52  
53  
54  
55  
56  
57  
58  
59  
60

## Abstract

**Objective:** The objective of this scoping review was to collate physical health conditions in Mincéirs - Irish Travellers

**Design:** Scoping review

**Search Strategy:** MEDLINE/PubMed, EMBASE, PEDro, AMED, CINAHL, PsycINFO, SCOPUS as well as reports and grey literature were searched for primary data reporting physical health of Irish Travellers.

**Results:** From 198 citations generated from the database search, 9 unique studies (18 reports) were included in this scoping review, including n=7,342 participants. Driven by the data, physical health conditions were categorised into cardiovascular diseases, respiratory diseases, injuries, genetic disorders and gut/bowel conditions. This review showed that the metabolic syndrome, asthma, bronchitis, tuberculosis and intentional injuries were 2-3 times more prevalent in Irish Travellers compared to the background population. Genetic conditions were also described in a proportion of Travellers.

**Conclusions;** Overall Irish Travellers experience a disproportionate burden of physical health conditions compared to background populations. Health care providers need to be aware of the unique physical health burden experienced by many Irish Travellers and devise improved targeted health care strategies for this vulnerable and marginalised group.

### Strengths and limitations of this study

- The methods for this scoping review were informed by the scoping review guidance from the Joanna Briggs Institute and it was reported according to the Preferred Reporting Items for Systematic Review and Meta-Analyses extension for Scoping Reviews (PRISMA-ScR) Checklist.
- Screening and data extraction processes were performed in duplicate.

- Stakeholder involvement was integral to this review, as a member of the Travelling community was one of the co-authors of this work.
- This was the first time all studies, reports and grey literature were comprehensively reviewed and collated to provide a broad picture of the physical health of Irish Travellers.
- As is the convention in scoping reviews, quality assessment was not undertaken – results must be interpreted in light of this.

## Introduction

Irish Travellers or 'Mincéirs', as known in their language of Shelta<sup>1,2</sup>, are a traditionally nomadic minority group primarily based on the island of Ireland<sup>3</sup>. They also reside in the UK with smaller populations in Europe and the USA. The number of Travellers recorded in the Irish Census of 2016 was reported to be 30,987 accounting for 0.7% of the general population<sup>4</sup>. In the 2011 Census for England and Wales, 58,000 people identified as Gypsy or Traveller (Irish origin) which may be an underestimation of the actual number<sup>5</sup>.

The term 'Travellers' refers to people who have a tradition based on a mobile lifestyle and includes English and Welsh Gypsies, Irish Travellers and Scottish Travellers<sup>6</sup>. Each group has a separate ethnic identity and shares common aspects of cultural identity<sup>7</sup>. In this work, we included 'Irish Travellers' only. As 'Irish Travellers' are often known as 'Travellers', this term is used hereafter, recognising that the authors are referring to Travellers of Irish descent.

Travellers have been recognised formally as a distinct indigenous ethnic group in Ireland since 2017, which should have marked a positive step towards an inclusive society<sup>8</sup>. Yet, Travellers are 22 times more likely to experience discrimination than the general population<sup>9</sup> and they remain a severely marginalised group<sup>10,11</sup>. Consequently, Travellers face poor health and experience a higher burden of mortality and morbidity than the general population<sup>11</sup>.

Traveller life expectancy has been reported to be 66 years, 11.5-15.1 years less than that of the general population<sup>11</sup>. The infant mortality rate is 3.6 times higher than the general population<sup>11</sup> and ten percent of Travellers do not reach their 2nd birthday<sup>12</sup>. The

1  
2  
3 disproportionate mortality may be due to poor health as well as other factors such as  
4 inadequate housing, education and literacy levels<sup>13</sup>. Mental health disorders are prevalent,  
5 with reported suicide rates six-seven fold higher than the general population<sup>11</sup>. Physical  
6 health appears to be poorer<sup>11</sup> but the scale and range of physical health conditions  
7 experienced by Travellers is not well known. The aim of this review was to summarise  
8 available data and categorise the physical health of Travellers. Due to the exploratory  
9 nature and lack of delineation of this area identified by an initial test review, a scoping  
10 review methodology was chosen.  
11  
12  
13  
14  
15  
16  
17  
18  
19  
20

21 The objectives of this review were;

- 22  
23 (i) To explore the extent, breadth and nature of the literature with regards to the physical  
24 health of Travellers.  
25  
26 (ii) To categorise the evidence about physical health in Travellers.  
27  
28 (iii) To compare the physical health of Travellers to the background population where  
29 possible.  
30  
31  
32  
33  
34  
35  
36

### 37 **Methodology**

38  
39 The protocol of for this review was published on Open Science Framework  
40 (<https://osf.io/v6etg/>). This review followed the Joanna Briggs Institute's (JBI) methodology  
41 for scoping reviews<sup>14</sup> and was also informed by the original framework of Arksey<sup>15</sup>, and  
42 enhancements proposed by Levac<sup>16</sup>. It was checked against the Preferred Reporting Items  
43 for Systematic reviews and Meta-Analyses extension for Scoping Reviews (PRISMA-ScR)  
44 Checklist<sup>17</sup>.  
45  
46  
47  
48  
49

50  
51 The inclusion criteria was based on the Patient, Concept, Context (PPC) mnemonic<sup>18</sup>. The  
52 population was Travellers. The concept referred to physical health. It was originally  
53 envisaged that this review would encompass 'health' in a more holistic way including mental  
54 and physical health. Given the large scope of a review including both dimensions of health, a  
55  
56  
57  
58  
59  
60

1  
2  
3 pragmatic decision was taken to consider physical health only in this review and refine the  
4 search strategy appropriately<sup>19 20</sup>.

5  
6  
7 A comprehensive search strategy was developed collaboratively with a skilled research  
8 librarian (DM). The following electronic databases were searched: MEDLINE/PubMed,  
9 EMBASE, PEDro, AMED, CINAHL, PsycINFO, SCOPUS (see extended data). The search  
10 strategy was generated from a combination of free text search terms, text words, Medical  
11 Subject Headings (MeSH) terms and keywords with Boolean operators. The full search  
12 details are outlined in Supplementary Box 1. Authors of abstracts included in this review  
13 were contacted to ascertain if full text versions were available. Reference lists of included  
14 studies were examined for relevant studies. Grey literature was searched using the CADTH  
15 Grey Matters tool and the following websites were checked; Lenus, ProQuest E-Thesis Portal  
16 and RIAN. A search of Google Scholar and WorldCat search engines was also performed.  
17  
18

19 Only English language sources were searched with no date restriction. Quantitative studies,  
20 which examined physical health of Travellers (>18 years) were included. Only baseline data  
21 of intervention studies were extracted.  
22  
23

24 Duplications were removed and studies were imported into Covidence™ for title and  
25 abstract screening which took place independently by two reviewers (JB/FK). Both authors  
26 then conducted a full-text evaluation. If necessary, discrepancies were resolved by  
27 consensus by including a third author.  
28  
29

30 Two reviewers (JB and FK) independently extracted data from the first ten studies using a  
31 bespoke data extraction instrument<sup>14 20</sup> and minor changes were then made. The following  
32 data was extracted [author, title, year of publication, aims/objectives, research design, living  
33 arrangements, number and location of participants, inclusion/exclusion criteria, data  
34 collection method, age, biological sex, details of physical disease in Traveller and physical  
35 background population if available]. Data were summarized and presented to show the  
36 breadth and depth of the field<sup>20</sup> and categorized meaningfully into subcategories of  
37 physical health.  
38  
39  
40  
41  
42  
43  
44  
45  
46  
47  
48  
49  
50  
51  
52  
53  
54  
55  
56  
57  
58  
59  
60



## Patient and Public Involvement

Stakeholder involvement was integral to this review. The research question was generated from the principal author who has an interest in the physical health characteristics of marginalised groups and was refined by engaging informally with a member of the Travelling community (AW) about this research topic who identified the poor physical health of many members of her community. AW was then personally invited to join the review team. Her involvement began after the initial database search and continued throughout the data synthesis and write-up phases. A number of online meetings took place during which AW shared her perspectives on early results and drafts of the review as they emerged.

## Results

### Studies identified

The original search was performed on 09.03.21 (re-run 02.11.21). After removal of duplicates, 197 studies were identified. After excluding irrelevant studies, a total of 9 studies and 18 reports were deemed eligible for inclusion. The PRISMA flow chart summarises the search strategy (Figure 1).

1  
2  
3 Figure 1: PRISMA flow diagram ABOUT HERE  
4  
5

6 Study characteristics are shown in Supplementary Table 1. Over seven thousand participants  
7 (n=7342) were included with more than half (n=4,141) from the AITHS<sup>11</sup>. One study took  
8 part in the UK<sup>21</sup> and the remaining studies were based in Ireland, North and South. Living  
9 arrangements of participants were reported in three studies. In one study, a quarter (n=515)  
10 lived in a caravan, a trailer or a chalet<sup>22</sup> and in another, participants' accommodation  
11 included encampments, halting sites and social housing<sup>23</sup>. All (Traveller) participants in Mac  
12 Gabhann's study (n=296) resided in prisons in England and Wales<sup>21</sup>.  
13  
14  
15  
16  
17  
18  
19

20 Participants' characteristics are shown in Supplementary Table 2. The UK based study  
21 included mostly male participants (93.6% male)<sup>21</sup> while one study was female only<sup>24</sup>. The age  
22 profile of participants was predominantly young, with the majority in their second, third and  
23 fourth decade.  
24  
25  
26  
27

28 Using a data-driven approach, physical diseases were categorised into the following  
29 conditions; cardiovascular disease (CVD), respiratory, genetic, injuries and gut/bowel  
30 conditions. Tables 1-4 summarise the physical health variables associated with these  
31 physical conditions.  
32  
33  
34  
35  
36  
37  
38  
39  
40  
41  
42  
43  
44  
45  
46  
47  
48  
49  
50  
51  
52  
53  
54  
55  
56  
57  
58  
59  
60

**Table 1: Cardiovascular diseases**

| <b>Physical Health Variable</b>               | <b>Authors</b>       | <b>Result</b>                                                            |
|-----------------------------------------------|----------------------|--------------------------------------------------------------------------|
| <b>High tri-glyceride levels</b>              | Tan et al 2009       | High triglyceride level 23% (n=49%), males 89% (n=8), females 40% (n=15) |
| <b>HDL/LDL</b>                                | Tan et al 2009       | Low HDL level, 62% (n=29), males 78%, females 58% (n=22)                 |
| <b>Impaired Fasting Glucose</b>               | Tan et al 2009       | Total: 19% (n=9), Males: 22% (n=2), females 18% (n=7)                    |
| <b>Diabetes Mellitus</b>                      | Slattery et al, 2011 | 5.9% Traveller sample (background population 4.3%)                       |
|                                               | Tan et al 2009       | 8.5% Traveller sample (background population 4.3%)                       |
| <b>Pre-diabetes</b>                           | Slattery et al, 2011 | 9.3% (background population 6.2%)                                        |
|                                               | Tan et al 2009       | 11.6% Traveller sample (background population 6.3%)                      |
| <b>Systolic BP <math>\geq</math> 130mmHg</b>  | Tan et al 2009       | Total 43% (n=20), Males: 22% (n=2), Females 47% (n=18)                   |
| <b>Diastolic BP <math>\geq</math> 85 mmHg</b> | Tan et al 2009       | Total 38% (n=18), Males: 44% (n=4), Females 37% (n=14)                   |
| <b>Metabolic Syndrome</b>                     | Slattery et al 2011  | 39.3% Traveller sample (background population 21%)                       |
|                                               | Tan et al 2009       | 53.2% Traveller sample (background population 21.0%)                     |



1  
2  
3  
4  
5  
6  
7  
8  
9  
10  
11  
12  
13  
14  
15  
16  
17  
18  
19  
20  
21  
22  
23  
24  
25  
26  
27  
28  
29  
30  
31  
32  
33  
34  
35  
36  
37  
38  
39  
40  
41  
42  
43  
44  
45  
46

|                                                                                                               |                          |                                                                                                                                                                                                                                                                                                                                                                                                                                                                                                                                                                                                                                                                                                                                                                                                                                                                                                                                                                                                                                                                                                                                                                                                                                                                                                                                                          |
|---------------------------------------------------------------------------------------------------------------|--------------------------|----------------------------------------------------------------------------------------------------------------------------------------------------------------------------------------------------------------------------------------------------------------------------------------------------------------------------------------------------------------------------------------------------------------------------------------------------------------------------------------------------------------------------------------------------------------------------------------------------------------------------------------------------------------------------------------------------------------------------------------------------------------------------------------------------------------------------------------------------------------------------------------------------------------------------------------------------------------------------------------------------------------------------------------------------------------------------------------------------------------------------------------------------------------------------------------------------------------------------------------------------------------------------------------------------------------------------------------------------------|
|                                                                                                               |                          | <ul style="list-style-type: none"> <li>- CIR of TB in the Traveller population was &lt;5/100000 population per annum from 2002-2009. This increased after 2010 and CIR &gt;10/100000 population per annum 2011-2013.</li> <li>- From 2002-2013, the CIR of TB decreased in the general population (10.5/100000 in 2002 to 8.3/100000 in 2013).</li> <li>- CIR for TB in Travellers was about 3-fold higher than that of white born Irish population in 2011 and 2012.</li> <li>- In 2013, the CIR in Travellers increased to 40.6/100000 following an outbreak.</li> <li>- 5-year cumulative CIR 2009-2013:             <ul style="list-style-type: none"> <li>o Travellers: 81.4/100000</li> <li>o General pop: 45.5/100000</li> <li>o White Irish-born: 27.3/100000</li> </ul> </li> <li>- When AITHS population data was used to calculate CIR rather than the CSO Census data, the CIR was lower. Regardless of the method of data collection of CIR, the rate was still higher in Irish travellers than the general population/white Irish born.</li> <li>- Average incidence by age was higher for the Traveller population, majority in 0-34 age group, compared to the general population where the majority was in the 25-65 age group and in the white Irish-born population where the majority was in the 55 to &gt; 65 age group.</li> </ul> |
| <p><b>COPD:</b> number of smokers, presence of respiratory symptoms, diagnosis of asthma &amp; spirometry</p> | <p>Nolan et al, 2017</p> | <ul style="list-style-type: none"> <li>- 41% were current smokers, 6/14 non-smokers regularly exposed to passive smoke</li> <li>- 86% of smokers reported respiratory symptoms including cough, wheeze and shortness of breath</li> <li>- 10/35 had GP diagnosis of asthma</li> <li>- 23% (7/30) had obstructive pattern</li> </ul>                                                                                                                                                                                                                                                                                                                                                                                                                                                                                                                                                                                                                                                                                                                                                                                                                                                                                                                                                                                                                      |

**Table 3: Injuries**

| Details of non-fatal injuries                                                                                     | Authors             | Result                                                                                                                                                                                                                                                                                                                                                                                                                                                                                                                                                                                                                                                                                                                                                                   |
|-------------------------------------------------------------------------------------------------------------------|---------------------|--------------------------------------------------------------------------------------------------------------------------------------------------------------------------------------------------------------------------------------------------------------------------------------------------------------------------------------------------------------------------------------------------------------------------------------------------------------------------------------------------------------------------------------------------------------------------------------------------------------------------------------------------------------------------------------------------------------------------------------------------------------------------|
| <b>Injury</b><br><b>(prevalence of injury and intentional/unintentional)</b>                                      | Abdalla et al, 2013 | <ul style="list-style-type: none"> <li>- Travellers had a higher incidence of intentional injuries, SIR = 224 for intentional injuries (male = 181, female = 268)</li> <li>- Travellers had a lower incidence of unintentional injury than the general population: SIR = 44 (male = 42, female = 46).</li> <li>- Travellers over 65 years were twice as likely to report an injury than the general population.               <ul style="list-style-type: none"> <li>o Overall injury SIR for Travellers aged 15-64 years = 59 &amp; 65 years +=208</li> <li>o Intentional injury SIR for Travellers &gt;65 years = 517</li> <li>o Unintentional injury SIR for Travellers &gt;65years= 137. Overall injury SIR for Travellers &gt;65years = 208.</li> </ul> </li> </ul> |
| <b>Injury</b><br><b>(Question from Dimension 4 Lifestyle and health behaviour of the health status interview)</b> | Kelleher et al 2012 | ‘Free of injuries in the last 2 years vs. one or more injury’: 88.7% (n=1800)                                                                                                                                                                                                                                                                                                                                                                                                                                                                                                                                                                                                                                                                                            |

*SIR: standardised incidence ratio (ratio of the observed number of Traveller non-fatal injuries to that expected if Travellers experienced the age-specific retrospective incidence of non-fatal injury of the general population)*

**Table 4: Genetic diseases, other conditions and self-rated health**

| Details of Genetic disease                                                              |                                                              | Author                                   | Result                                                                                                                                                                                                                                                                                                                                                                                                                                                                                                                                                   |
|-----------------------------------------------------------------------------------------|--------------------------------------------------------------|------------------------------------------|----------------------------------------------------------------------------------------------------------------------------------------------------------------------------------------------------------------------------------------------------------------------------------------------------------------------------------------------------------------------------------------------------------------------------------------------------------------------------------------------------------------------------------------------------------|
| <b>Phenotype</b>                                                                        | Medical history, clinical observation & physical examination | Cullinane, Lynch and Marnane, 2020       | Case of leukoencephalopathy described. Patient presented with short stature, pes planus, hypotonia, history of osteogenic sarcoma<br><br>Participants' medical history: Epilepsy, multiple cerebral cysts (removed by craniotomy/cyst excisions over the course of 15 years from age 5), left ventriculo-peritoneal shunt inserted and later removed, multiple vascular malformations of the capillary-cavernous type with associated haematomas, surrounding gliosis, hemosiderin deposition, Rosenthal fibres and areas of white matter calcification. |
|                                                                                         | Blood & urine testing                                        | Flynn et al (1989)                       | Type II hyperprolinaemia (n=13, including 7 adults)<br><br>Mild hyperprolinaemia (n=50, proportion of adults unclear)<br><br>Seizures from hyperprolinaemia: 4 adults suffered grand mal seizures, 1 of whom had a severe mental handicap, 1 suffered from petit mal seizures.                                                                                                                                                                                                                                                                           |
| <b>Genotype</b>                                                                         | Whole exome sequencing                                       | Cullinane, Lynch and Marnane, 2020       | Identified a homozygous variant of the SNORD118 gene. The sister of this case, with milder symptoms was homozygous for the same variant.                                                                                                                                                                                                                                                                                                                                                                                                                 |
| <b>Other conditions</b>                                                                 |                                                              |                                          |                                                                                                                                                                                                                                                                                                                                                                                                                                                                                                                                                          |
| <b>Chronic inflammatory bowel disease</b>                                               |                                                              | McCormick et al,                         | No recorded traveller with idiopathic inflammatory bowel disease                                                                                                                                                                                                                                                                                                                                                                                                                                                                                         |
| <b>Self-rated Health:</b>                                                               |                                                              |                                          |                                                                                                                                                                                                                                                                                                                                                                                                                                                                                                                                                          |
| 'Chronic health condition diagnosed by GP'                                              |                                                              | Kelleher et al, 2012                     | 41.5% (n = 2022)                                                                                                                                                                                                                                                                                                                                                                                                                                                                                                                                         |
| Physical Health not good $\geq$ 1 day in last month                                     |                                                              | (Dimension 6 in Health Status Interview) | 59.3% (n=1843)                                                                                                                                                                                                                                                                                                                                                                                                                                                                                                                                           |
| Daily activity or work limited due to a long-term illness, health problem or disability |                                                              |                                          | 17.2% (2012)                                                                                                                                                                                                                                                                                                                                                                                                                                                                                                                                             |
| <b>Doctor-diagnosed illnesses within 12 months</b>                                      |                                                              | AITHS                                    | Health Status (Travellers ROI, n=1624)<br><br>back condition (30.4%), asthma (12.5%), chronic bronchitis (12%), cancer (1%), arthritis (13.8%), diabetes (6.1%), angina (4.3%), heart attack (2.3%), stroke (1.1%)                                                                                                                                                                                                                                                                                                                                       |

1  
2  
3 Three studies reported cardiovascular diseases (Table 1). Tan et al, (2009)<sup>25</sup> reported the  
4 following CVD risk factors among study participants (n=47); high triglyceride levels (23%),  
5 low HDL cholesterol levels (62%), impaired fasting glucose levels (19%) and hypertension  
6 (systolic BP  $\geq$  130mmHg 43% and diastolic BP  $\geq$  85mmHg 38%)<sup>25</sup>. The prevalence of  
7 diabetes, pre-diabetes and the metabolic syndrome evaluated in a series of pilot studies was  
8 higher than the general population<sup>26</sup>.  
9  
10  
11  
12  
13  
14

15 Two studies explored respiratory conditions (Table 2)<sup>27 28</sup>. One study reported a five-year  
16 tuberculosis (TB) cumulative crude incidence rate (CIR) of 81.4/100000 in Travellers  
17 compared to 45.5/100000 and 27.3/100000 in the general population and white Irish-born  
18 population, respectively<sup>27</sup>. Nolan et al (2017) reported that 41% of Travellers were smokers  
19 and 86% of these smokers reported respiratory symptoms including cough, wheeze and  
20 shortness of breath while 23% had an obstructive respiratory disease pattern<sup>28</sup>.  
21  
22  
23  
24  
25  
26

27 Abdalla et al (2020) evaluated injuries<sup>29</sup> (Table 3). They demonstrated that the prevalence of  
28 unintentional non-fatal injury in Travellers < 65 years was lower (SIR=40), while the  
29 prevalence of intentional injury was higher (SIR=213) than the general population. Travellers  
30 > 65 years had higher injury rates for both unintentional (SIR=137) and intentional injury  
31 (SIR=517).  
32  
33  
34  
35  
36

37 Two studies (Table 4) examined genetic disorders both inherited in an autosomal recessive  
38 manner. One was a case report of a 32 year-old female who inherited a rare  
39 leukoencephalopathy and severe central nervous system (CNS) impairment was reported<sup>31</sup>.  
40 Flynn et al (1989) also reported CNS dysfunction in Travellers due to the presence of Type II  
41 hyperprolinemia<sup>30</sup>.  
42  
43  
44  
45  
46

47 One study examined effects of lifestyle changes on the microbiome and its associated risks  
48 for chronic disease<sup>23</sup>. Results demonstrated that Travellers retained a microbiota similar to  
49 that of non-industrialised populations due to halting site dwelling, number of siblings and  
50 animal ownership. Another study evaluating the prevalence of inflammatory bowel disease  
51 found no records of idiopathic bowel disease in the Traveller population<sup>31</sup>.  
52  
53  
54  
55  
56  
57  
58  
59  
60



## Discussion

This review appears to be the first time data relating to physical health of Travellers has been synthesised. Pooling this evidence highlights the disproportionately high burden of physical health conditions experienced by Travellers compared to the general population.

Over 7,000 Travellers were included in this review with the largest source of data from the AITHS (n=4,141). One study took place in England and Wales, while the rest of studies were based in Ireland. Living conditions were not specified in the majority of studies. This is important to note as living conditions are a key driver of health<sup>32</sup> which is rated higher by Travellers when living conditions are better<sup>22 23</sup>.

There was a higher representation of females (61%) within this review. This may be explained by findings from the AITHS highlighting that female Travellers were more likely to engage in research studies<sup>11</sup>. The majority of participants were in their second to fourth decades, which concurs with CSO (2016) data<sup>4</sup> demonstrating that Travellers are a young population. The paucity of older participants means that the effects of ageing and extent of geriatric syndromes in this population are not fully known.

This review showed high rates of CVD risk factors and established CVD disease yet lower self-reported CVD of approximately 5%. This compared to a self-reported CVD rate of 16.1% for the general population. This likely underestimation of CVD among Travellers may be due to a reluctance to divulge information and/or a lack of disease awareness, fewer attendances for preventive services as well as late presentation and higher case-fatality rates of CVD<sup>11</sup>. The incidence of metabolic disease was over twice as high among Travellers (53.2%) compared to the background population (21%)<sup>26</sup>. Evidently, improved targeted primary and secondary care strategies for Travellers are required.

Respiratory conditions (bronchitis and asthma) were rated as the second most common physical health condition, with a prevalence of 24.5% among Travellers in the ROI and 35.1% in Northern Ireland<sup>11</sup>. This is considerably higher than the comparison ROI background population of 3% with chronic bronchitis<sup>33</sup>. This concurs with Nolan's findings where 28.5% of Travellers had a GP diagnosis of asthma and 23% had abnormal spirometry results<sup>28</sup>.

Rates of TB were three-fold higher in Travellers than the white Irish-born population<sup>27</sup> and

1  
2  
3 proposed risk factors were cited as higher house occupancy, smoking and the presence of  
4 diabetes or pre-diabetes.  
5  
6

7 Travellers suffer a greater burden of injuries and a higher risk of dying from injuries than the  
8 general population<sup>29</sup>. Notably, a higher rate of intentional injuries was reported and a lower  
9 rate of unintentional injuries compared to the general population. The high rate of  
10 intentional injuries likely links to mental health crises among Travellers with a suicide rate  
11 six times the general population<sup>11</sup>. The true intentional-injury rates may be in fact higher as  
12 Travellers may not present themselves to care settings for minor injuries, and may be more  
13 inclined to self-treat or present late for care<sup>11</sup>. Conversely, there may actually be a lower  
14 unintentional-injury rate due to lower participation in sport and recreational activities in  
15 young Travellers. Travellers over 65 years, however, were twice as likely to be injured,  
16 highlighting their vulnerability. The AITHS (2010) cited the home as the most likely location  
17 for an injury, which may be due to poor living environments. This is in accordance with a  
18 recent report, which highlighted grossly inadequate living conditions among Travellers<sup>34</sup>.  
19  
20  
21  
22  
23  
24  
25  
26  
27  
28  
29

30 This review highlighted two genetic conditions, representing an important factor affecting  
31 physical health in Travellers as autosomal recessive conditions are commonly reported<sup>35</sup>. Of  
32 note, some studies examining inherited disorders (n=5) were excluded from this review as  
33 they did not meet the age-related eligibility criteria. Given that genetic conditions are  
34 prevalent in Travellers, consideration of 'grown up' genetic conditions should be an area of  
35 emerging focus.  
36  
37  
38  
39  
40

41 Positive physical health factors linked to the gut, were discussed in two studies<sup>23 31</sup>.

42 McCormick et al (2001) noted the absence of consultant-diagnosed inflammatory bowel  
43 disease possibly due to exposure to enteric bacteria and infection in early life<sup>31</sup>. Keohane et  
44 al (2020) suggested the 'non-industrialised microbiome' of Travellers may be due to living  
45 conditions and animal ownership<sup>23</sup>. How the gut microbiome changes with modernisation  
46 should be evaluated in future studies.  
47  
48  
49  
50  
51  
52

53 A strength of this review is the synthesis of physical health data of Travellers based in  
54 England and Wales, ROI and Northern Ireland. A further strength was the active stakeholder  
55 involvement by the inclusion of a member of the Travelling community as an integral and  
56 valued member of the review team. This ensured the real world relevance of this research  
57  
58  
59  
60

1  
2  
3 and is likely to increase chances of implementation of research findings into real life  
4 settings<sup>36</sup>.  
5  
6

7 There were a number of limitations. As is the general convention in scoping reviews a  
8 formal quality assessment of included studies<sup>14 15</sup> was not conducted therefore, the  
9 robustness of evidence<sup>15</sup> could not be judged. We acknowledge that definitive  
10 recommendations not be possible and the review must be interpreted in light of this<sup>14 15</sup>.  
11 We therefore see this work as a useful accessible summary of the evidence base regarding  
12 physical health in Travellers <sup>14 37 38</sup>. As previously stated, the initial intention was to perform  
13 a review encompassing physical and mental health, however, a pragmatic decision was  
14 taken to include physical health data only which we acknowledge is somewhat  
15 unidimensional as physical and mental health are inter-related and multi-morbidity can  
16 straddle both.  
17  
18  
19  
20  
21  
22  
23  
24  
25

### 26 **Recommendations and Gaps**

27  
28 The extent of physical health conditions may be underestimated due to Travellers not  
29 presenting or presenting late for care as well as a mistrust of healthcare professionals<sup>11</sup>.  
30 Ethnic identifiers would enable physical health data to be more accurately tracked but this  
31 would need to be conducted sensitively. Future studies including Travellers should include  
32 data on living arrangements. Non-communicable diseases such as cancer and arthritis in  
33 Travellers did not feature within this review.  
34  
35  
36  
37  
38  
39

40 While the AITHS <sup>11</sup>, the most comprehensive report of Traveller health is over 10 years old,  
41 bridging the implementation gap is strongly recommended rather than further reports<sup>39</sup>.  
42 Healthcare service design needs to be culturally appropriate, although, how cultural  
43 competence can best be applied to Travellers is not well known<sup>40</sup>. Further work is needed to  
44 empower Travellers to self-manage their health without 'talking at them'. Functional and  
45 health literacy levels need to be optimised while also reducing the stigma associated with  
46 accessing healthcare <sup>11</sup>.  
47  
48  
49  
50  
51  
52  
53  
54  
55  
56  
57  
58  
59  
60

## Conclusion

This scoping review highlights marked inequalities in the burden of physical health conditions experienced by Mincéirí. Better targeted healthcare is necessary to meet the needs of this marginalised group.

## Acknowledgements

We would like to thank Dr. John Gilmore, University College Dublin who provided useful comments on this work. We would also like to thank excellent 2<sup>nd</sup> year medical students of Trinity College Dublin, who performed a test review, which preceded this work (Sinead Cummins, Cliona Sheehy, Eva Perdue, Laura Mc Kenna).

**Funding statement:** This research received no specific grant from any funding agency in the public, commercial or not-for-profit sector.

**Competing Interest:** There is no competing interest to consider.

## Author's contribution

FK; independent data screening, data extraction, data synthesis, drafting of manuscript, AW; contribution to the development of the design, drafting of manuscript, JV; drafting of manuscript, DM; generation and refinement of search strategy, JB; conception of original idea and deigning the study, refinement of search strategy, independent data screening, data extraction, data synthesis, drafting of manuscript. All authors provided important intellectual contribution and guidance throughout the development of the manuscript. All authors contributed, edited and approved the final version of this manuscript.

**Provenance and peer review:** Not commissioned; externally peer reviewed.

**Data sharing statement:** All relevant data are within the paper and supporting material.

**Patient consent for publication:** Not required.

**Ethics Approval:** This is a review - so does not contain primary data so ethical approval is not required.

## References

1. Ni Shuinear S. In Irish Travellers: Culture and Ethnicity Belfast: Institute of Irish Studies: Belfast 1994:134–154.
2. Binchy A (1995). Travellers language. In A Heritage Ahead (ed. L. N. Ni and G. O’Riain) pPPPD. Travellers language. In A Heritage Ahead. Dublin Pavee Point Publications 1995:87-93.
3. Gilbert E, Carmi S, Ennis S, et al. Genomic insights into the population structure and history of the Irish Travellers. *Sci Rep* 2017;7:42187. doi: 10.1038/srep42187 [published Online First: 2017/02/10]
4. Office CS. Census of population 2016 – profile 8 Irish Travellers, ethnicity and religion, 2016.
5. Library HoC. Gypsies and Travellers. 2019
6. Doyal L CA, Cemlyn S, Nandy S, Shaw M. The health of Travellers in the South West region, South West Public Health Observatory, 2002.
7. Parry G, Van Cleemput P, Peters J, et al. Health status of Gypsies and Travellers in England. *Journal of Epidemiology and Community Health* 2007;61(3):198-204. doi: 10.1136/jech.2006.045997
8. Ireland Go. Statement by An Taoiseach Enda Kenny TD on the recognition of Travellers as an ethnic group, Dáil Éireann, 2017.
9. McGinnity F GR, Kenny O, Russell H. Who Experiences Discrimination in Ireland? Evidence from the QNHS Equality Modules.: Irish Human Rights and Equality Commission and Economic and Social Research Institute. Dublin 2017.
10. McGorrian C, Hamid NA, Fitzpatrick P, et al. Frequent mental distress (FMD) in Irish Travellers: Discrimination and bereavement negatively influence mental health in the All Ireland Traveller Health Study. *Transcultural Psychiatry* 2013;50(4):559-78. doi: 10.1177/1363461513503016
11. AITHS. All Ireland Traveller Health Study: Our Geels, Summary of Findings. Dublin: University College Dublin, 2010.
12. : Parish of the Travelling People, 2007.
13. Point P. Mental Health and Suicide in the Traveller Community. Pavee Point Publications. . Dublin, 2013.
14. Peters MD, Godfrey C, McInerney P, et al. JBI Manual for Evidence Synthesis 2020.
15. Arksey HOM, L. . Scoping studies: towards a methodological framework. *International Journal of Social Research Methodology* 2005;8:19-32.
16. Levac DC, H. O’Brien, K.K. Scoping studies: advancing the methodology. *Implementation Science* 2010;5
17. Tricco AC, Lillie E, Zarin W, et al. PRISMA Extension for Scoping Reviews (PRISMA-ScR): Checklist and Explanation. *Ann Intern Med* 2018;169(7):467-73. doi: 10.7326/m18-0850 [published Online First: 20180904]
18. Peters MDJ, Godfrey, C., McInerney, P., Munn, Z., Tricco, A. C., Khalil, H. . JBI Manual for Evidence Synthesis2020.
19. Daudt HM, van Mossel C, Scott SJ. Enhancing the scoping study methodology: a large, inter-professional team’s experience with Arksey and O’Malley’s framework. *BMC Med Res Methodol* 2013;13:48. doi: 10.1186/1471-2288-13-48 [published Online First: 20130323]
20. Levac D, Colquhoun H, O’Brien KK. Scoping studies: advancing the methodology. *Implement Sci* 2010;5:69. doi: 10.1186/1748-5908-5-69 [published Online First: 2010/09/22]
21. Mac Gabhann C. Voices unheard. *A Study of Irish Travellers in Prison London: Irish Chaplaincy in Britain* 2011
22. Kelleher CC, Whelan J, Daly L, et al. Socio-demographic, environmental, lifestyle and psychosocial factors predict self rated health in Irish Travellers, a minority nomadic population. *Health and Place* 2012;18(2):330-38. doi: 10.1016/j.healthplace.2011.10.009

23. Keohane DM, Ghosh TS, Jeffery IB, et al. Microbiome and health implications for ethnic minorities after enforced lifestyle changes. *Nature Medicine* 2020;26(7):1089-95.
24. Hodgins M, Millar M, Barry MM. "...it's all the same no matter how much fruit or vegetables or fresh air we get": Traveller women's perceptions of illness causation and health inequalities. *Social Science and Medicine* 2006;62(8):1978-90. doi: 10.1016/j.socscimed.2005.08.052
25. Tan S, Avalos G, Dineen B, et al. Traveller health: Prevalence of diabetes, pre diabetes and the metabolic syndrome. *Irish Medical Journal* 2009;102(6)
26. Slattery D, Brennan M, Canny C, et al. The Prevalence of Diabetes, Pre Diabetes and the Metabolic Syndrome in Irish Travellers. *Diabetes* 2011;60:A661-A61.
27. O'Toole RF, Jackson S, Hanway A, et al. Tuberculosis incidence in the Irish Traveller population in Ireland from 2002 to 2013. *Epidemiology and Infection* 2015;143(13):2849-55. doi: 10.1017/S0950268815000138
28. Nolan G, Wending B, Smyth E, et al. Respiratory health in an Irish traveller community. *Irish Journal of Medical Science* 2017;186:S432-S33. doi: 10.1007/s11845-017-1678-9
29. Abdalla S, Kelleher CC, Quirke B, et al. Disparities in fatal and non-fatal injuries between Irish travellers and the Irish general population are similar to those of other indigenous minorities: A cross-sectional population-based comparative study. *BMJ Open* 2013;3(1) doi: 10.1136/bmjopen-2012-002296
30. Flynn MP, Martin m C, Moore PT, et al. Type II hyperprolinaemia in a pedigree of Irish travellers (nomads). *Archives of Disease in Childhood* 1989;64(12):1699-707. doi: 10.1136/adc.64.12.1699
31. McCormick PA, Manning D. Chronic inflammatory bowel disease and the 'over-clean' environment: Rarity in the Irish 'Traveller' community. *Irish Medical Journal* 2001;94(7):203-04.
32. Abdalla S, Kelleher C, Quirke B, et al. Social inequalities in health expectancy and the contribution of mortality and morbidity: the case of Irish Travellers. *Journal of Public Health* 2013;35(4):533-40. doi: 10.1093/pubmed/fds106
33. Morgan K. SLAN 2007: survey of lifestyle, attitudes and nutrition in Ireland: main report, 2007.
34. Russell H, Provalko, I., Mc Ginnity F., Enright S. Monitoring adequate housing in Ireland The Economic and Social Research Institute, 2021.
35. Lynch SA, Crushell E, Lambert DM, et al. Catalogue of inherited disorders found among the Irish Traveller population. *J Med Genet* 2018;55(4):233-39. doi: 10.1136/jmedgenet-2017-104974 [published Online First: 20180122]
36. Concannon TW, Meissner P, Grunbaum JA, et al. A new taxonomy for stakeholder engagement in patient-centered outcomes research. *J Gen Intern Med* 2012;27(8):985-91. doi: 10.1007/s11606-012-2037-1 [published Online First: 20120413]
37. Antman EM, Lau J, Kupelnick B, et al. A comparison of results of meta-analyses of randomized control trials and recommendations of clinical experts. Treatments for myocardial infarction. *Jama* 1992;268(2):240-8.
38. Davis K, Drey N, Gould D. What are scoping studies? A review of the nursing literature. *Int J Nurs Stud* 2009;46(10):1386-400. doi: 10.1016/j.ijnurstu.2009.02.010 [published Online First: 20090327]
39. National Traveller and Roma Inclusion Strategy 2017 – 2021
40. Francis G. Developing the Cultural Competence of Health Professionals Working with Gypsy Travellers. *Journal of Psychological Issues in Organizational Culture* 2013;3:64-77.

## Figure Legend

Figure 1 PRISMA flow diagram

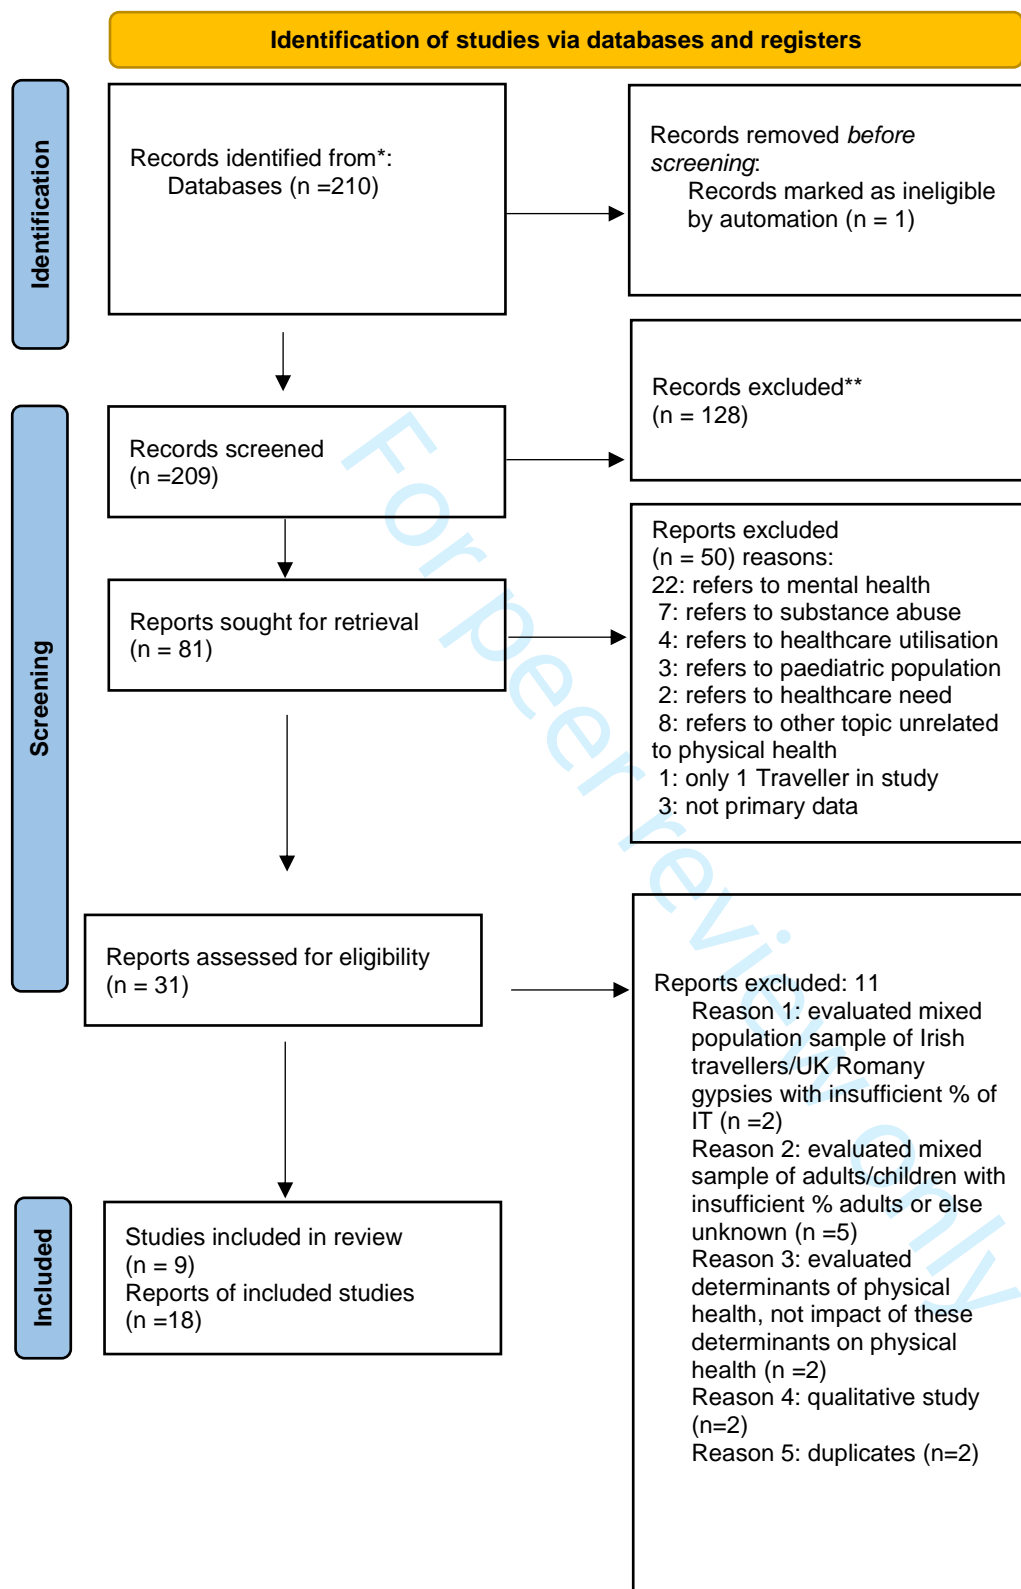

### Supplementary Box 1: Full search details

#### EMBASE

'health'/exp OR 'health status'/exp OR 'mental health'/exp OR 'mental disease'/exp OR 'physical disease'/exp

((Mental\* OR psychological\*) NEAR/2 (condition OR factor\* OR health OR fit OR fitness OR help OR state\* OR status OR well-being OR 'well being' OR stress\* OR distress OR disease\*)):ti,ab  
(depression OR depressed OR addiction\* OR anxiety OR anxious OR delirium OR psychosis OR schizophreni\* ):ti,ab

((physical\*) NEAR/3 (health\* OR fit OR fitness OR well-being OR wellbeing OR status OR ill OR illness)):ti,ab

((cardiac OR cardiovascular OR heart) NEAR/3 (health OR disorder\* or disease\*)):ti,ab

('health study' OR 'health studies'):ti,ab

#1 OR #2 OR #3 OR #4 OR #5 OR #6

((Irish OR Ireland OR Dublin OR limerick OR Waterford OR Galway OR Dublin OR cork) NEAR/3 (traveller\* OR gypsy OR gypsies)):ti,ab

#7 AND #8

#### Medline (OVID)

exp Health/ OR exp Health Status/ OR exp Mental Disorders/ OR exp Chronic Disease/ OR exp Health Behavior/

((Mental\* OR psychological\*) adj2 (condition OR factor\* OR health OR fit OR fitness OR help OR state\* OR status OR well-being OR well being OR stress\* OR distress OR disease\*)).ti,ab.

(depression OR depressed OR addiction\* OR anxiety OR anxious OR delirium OR psychosis OR schizophreni\* ).ti,ab.

((physical\*) adj3 (health\* OR fit OR fitness OR well-being OR wellbeing OR status OR ill OR illness)).ti,ab.

((cardiac OR cardiovascular OR heart) adj3 (health OR disorder\* or disease\*)).ti,ab.

(health study OR health studies).ti,ab.

or/1-6

((Irish OR Ireland OR Dublin OR limerick OR Waterford OR Galway OR Dublin OR cork) adj3 (traveller\* OR gypsy OR gypsies)).ti,ab.

7 AND 8

#### Web of Science

TS =((((Mental\* OR psychological\*) NEAR/2 (condition OR factor\* OR health OR fit OR fitness OR help OR state\* OR status OR well-being OR "well being" OR stress\* OR distress OR disease\*)) OR (depression OR depressed OR addiction\* OR anxiety OR anxious OR delirium OR psychosis OR schizophreni\*) OR ((physical\*) NEAR/3 (health\* OR fit OR fitness OR well-being OR wellbeing OR status OR ill OR illness)) OR ((cardiac OR cardiovascular OR heart) NEAR/3 (health OR disorder\* or disease\*)) OR ("health study" OR "health studies")) AND ((Irish OR Ireland OR Dublin OR limerick OR Waterford OR Galway OR Dublin OR cork) NEAR/3 (traveller\* OR gypsy OR gypsies)))

#### GoogleScholar

"Irish travellers|traveller" "mental health|fitness|status|distress" "physical fitness|health|status|illness"

#### CINAHL

(MH "Mental Health") OR (MH "Mental Health Services+") OR (MH "Health Status+") OR (MH "Physical Fitness+") OR (MH "Psychological Well-Being")

TI ((Mental\* OR psychological\*) N2 (condition OR factor\* OR health OR fit OR fitness OR help OR state\* OR status OR well-being OR "well being" OR stress\* OR distress OR disease\*)) OR AB



1  
2  
3  
4 ((Mental\* OR psychological\*) N2 (condition OR factor\* OR health OR fit OR fitness OR help OR  
5 state\* OR status OR well-being OR "well being" OR stress\* OR distress OR disease\*))  
6 TI (depression OR depressed OR addiction\* OR anxiety OR anxious OR delirium OR psychosis OR  
7 schizophreni\*) OR AB (depression OR depressed OR addiction\* OR anxiety OR anxious OR delirium  
8 OR psychosis OR schizophreni\*)  
9 TI ((physical\*) N2 (health\* OR fit OR fitness OR well-being OR wellbeing OR status OR ill OR  
10 illness)) OR AB ((physical\*) N2 (health\* OR fit OR fitness OR well-being OR wellbeing OR status OR  
11 ill OR illness))  
12 TI ((cardiac OR cardiovascular OR heart) N3 (health OR disorder\* or disease\*)) OR AB ((cardiac OR  
13 cardiovascular OR heart) N3 (health OR disorder\* or disease\*))  
14 TI ("health study" OR "health studies") OR AB ("health study" OR "health studies")  
15 S1 OR S2 OR S3 OR S4 OR S5 OR S6  
16  
17 TI ((Irish OR Ireland OR Dublin OR limerick OR Waterford OR Galway OR Dublin OR cork) N3  
18 (traveller\* OR gypsy OR gypsies)) OR AB ((Irish OR Ireland OR Dublin OR limerick OR Waterford OR  
19 Galway OR Dublin OR cork) N3 (traveller\* OR gypsy OR gypsies))  
20 S7 AND S8  
21

### 22 SCOPUS

23  
24 TITLE-ABS-KEY (((Mental\* OR psychological\*) W/2 (condition OR factor\* OR health OR fit OR  
25 fitness OR help OR state\* OR status OR well-being OR "well being" OR stress\* OR distress OR  
26 disease\*)) OR (depression OR depressed OR addiction\* OR anxiety OR anxious OR delirium OR  
27 psychosis OR schizophreni\*) OR ((physical\*) W/3 (health\* OR fit OR fitness OR well-being OR  
28 wellbeing OR status OR ill OR illness)) OR ((cardiac OR cardiovascular OR heart) W/3 (health OR  
29 disorder\* or disease\*)) OR ("health study" OR "health studies")) AND ((Irish OR Ireland OR Dublin  
30 OR limerick OR Waterford OR Galway OR Dublin OR cork) W/3 (traveller\* OR gypsy OR gypsies))  
31  
32

### 33 PsyclNFO

34 DE "Mental Health" OR DE "Health" OR DE "Health Literacy" OR DE "Health Status" OR DE  
35 "Physical Health" OR DE "Health Attitudes" OR DE "Health Behavior" OR DE "Health Risk Behavior"  
36 OR DE "Mental Disorders" OR DE "Chronic Mental Illness"  
37 TI ((Mental\* OR psychological\*) N2 (condition OR factor\* OR health OR fit OR fitness OR help OR  
38 state\* OR status OR well-being OR "well being" OR stress\* OR distress OR disease\*)) OR AB  
39 ((Mental\* OR psychological\*) N2 (condition OR factor\* OR health OR fit OR fitness OR help OR  
40 state\* OR status OR well-being OR "well being" OR stress\* OR distress OR disease\*))  
41 TI (depression OR depressed OR addiction\* OR anxiety OR anxious OR delirium OR psychosis OR  
42 schizophreni\*) OR AB (depression OR depressed OR addiction\* OR anxiety OR anxious OR delirium  
43 OR psychosis OR schizophreni\*)  
44 TI ((physical\*) N2 (health\* OR fit OR fitness OR well-being OR wellbeing OR status OR ill OR  
45 illness)) OR AB ((physical\*) N2 (health\* OR fit OR fitness OR well-being OR wellbeing OR status OR  
46 ill OR illness))  
47 TI ((cardiac OR cardiovascular OR heart) N3 (health OR disorder\* or disease\*)) OR AB ((cardiac OR  
48 cardiovascular OR heart) N3 (health OR disorder\* or disease\*))  
49 TI ("health study" OR "health studies") OR AB ("health study" OR "health studies")  
50 S1 OR S2 OR S3 OR S4 OR S5 OR S6  
51  
52 TI ((Irish OR Ireland OR Dublin OR limerick OR Waterford OR Galway OR Dublin OR cork) N3  
53 (traveller\* OR gypsy OR gypsies)) OR AB ((Irish OR Ireland OR Dublin OR limerick OR Waterford OR  
54 Galway OR Dublin OR cork) N3 (traveller\* OR gypsy OR gypsies))  
55 S7 AND S8  
56  
57  
58  
59  
60

Supplementary Table 1: Study Characteristics

| No | Author(s) and Title                                   | Study Aims & Objectives                                                                                                                                                                                                                                                                                                                                                                  | Research Design               | Living Arrangements                | Location of participants          | Inclusion/Exclusion Criteria      | Data Collection Methods                                                                                           |
|----|-------------------------------------------------------|------------------------------------------------------------------------------------------------------------------------------------------------------------------------------------------------------------------------------------------------------------------------------------------------------------------------------------------------------------------------------------------|-------------------------------|------------------------------------|-----------------------------------|-----------------------------------|-------------------------------------------------------------------------------------------------------------------|
| 1  | <b>The All Ireland Traveller Health Study (AITHS)</b> | <p>-To record the number of Travellers on the island of Ireland</p> <p>-To record fertility rate and deaths in one year</p> <p>-To follow a birth cohort for 1 year</p> <p>-To document health status and determine factors affecting the health status of Travellers and their access to health services</p> <p>-To document attitudes/perceptions of Travellers to health services</p> | Census and quantitative study | Documented in some studies/reports | Island of Ireland North and South | Travellers from island of Ireland | Survey-census section, health status section, health status for children, health services utilisation for adults. |

|     |                                                                                                                                                                                                                                                                                                                                                                                                 |                                                                                                                                            |                                                                                |                                                                                               |                             |                                                                                                                                                              |                                                                                                                                                                                                                                                                                                                                                         |
|-----|-------------------------------------------------------------------------------------------------------------------------------------------------------------------------------------------------------------------------------------------------------------------------------------------------------------------------------------------------------------------------------------------------|--------------------------------------------------------------------------------------------------------------------------------------------|--------------------------------------------------------------------------------|-----------------------------------------------------------------------------------------------|-----------------------------|--------------------------------------------------------------------------------------------------------------------------------------------------------------|---------------------------------------------------------------------------------------------------------------------------------------------------------------------------------------------------------------------------------------------------------------------------------------------------------------------------------------------------------|
| 1.a | <p>Abdalla et al, 2020.</p> <p><b>‘Disparities in fatal and non-fatal injuries between Irish travellers and the Irish general population are similar to those of other indigenous minorities: a cross-sectional population-based comparative study’</b></p>                                                                                                                                     | <p>To assess disparities in fatal and non-fatal injury between travellers and the general population in Ireland</p>                        | <p>Comparative study based on cross-sectional population-based data.</p>       | <p>Not stated</p>                                                                             | <p>ROI</p>                  | <p><u>Inclusion:</u></p> <ul style="list-style-type: none"> <li>-Irish Travellers who participated in the AITHS</li> <li>-Aged 15 years or older.</li> </ul> | <p><i>Traveller data:</i></p> <ul style="list-style-type: none"> <li>-from the AITHS</li> <li>-from the General Register Office</li> <li>-CSO</li> <li>-PHNs working with traveller families.</li> </ul> <p><i>General population data:</i> - from the CSO 2008 report 2006 census and the Survey of Lifestyle, Attitude and Nutrition (SLAN) 2002.</p> |
| 1.b | <p>(i) Kelleher et al, 2012</p> <p><b>Sociodemographic, environmental, lifestyle and psychosocial factors predict self-rated health in Irish Travellers, a minority nomadic population</b></p> <p>(ii) Whelan et al, 2010.</p> <p><b>Socio-demographic, health status, psycho-social and lifestyle predictors of self-rated health in the All-Ireland Traveller Health Study (abstract)</b></p> | <p>Aim: to assess the predictive ability of socio-demographic, environmental, lifestyle and psychosocial factors to self-rated health.</p> | <p>Census survey of Traveller families in Ireland, North and South (AITHS)</p> | <p>75% (n=1547) live in house/apartment</p> <p>25% (n=515) live in caravan/trailer/chalet</p> | <p>ROI/Northern Ireland</p> | <p><u>Inclusion:</u> Self-identified Travellers in the Republic and Northern Ireland</p>                                                                     | <p>Health Status survey: subjective questions around lifestyle, culture, social experiences/supports, health behaviour and self-reported health status.</p>                                                                                                                                                                                             |

|          |                                                                                                                                                                                                                                                                                                                                                                                                                    |                                                                                                                                                               |                                                 |                   |                                                                                                         |                                                                                                                |                                                                                                                                                                     |
|----------|--------------------------------------------------------------------------------------------------------------------------------------------------------------------------------------------------------------------------------------------------------------------------------------------------------------------------------------------------------------------------------------------------------------------|---------------------------------------------------------------------------------------------------------------------------------------------------------------|-------------------------------------------------|-------------------|---------------------------------------------------------------------------------------------------------|----------------------------------------------------------------------------------------------------------------|---------------------------------------------------------------------------------------------------------------------------------------------------------------------|
|          |                                                                                                                                                                                                                                                                                                                                                                                                                    |                                                                                                                                                               |                                                 |                   |                                                                                                         |                                                                                                                |                                                                                                                                                                     |
| 1.c      | <p>(i) Mc Gorrian et al, 2010</p> <p><b>Adverse cardiovascular risk profile in a disadvantaged minority community consistent with the thrifty phenotype hypothesis. Findings from the All-Ireland Traveller Health Study (Abstract)</b></p> <p>(ii) Mc Gorrian et al, 2012</p> <p><b>Cardiovascular disease and risk factors in an indigenous minority population. The All-Ireland Traveller Health Study.</b></p> | <p>Aim: To examine CVD epidemiology and CVD risk factors in Irish Travellers and associations with social disadvantage.</p>                                   | <p>Observational study</p>                      | <p>Not stated</p> | <p>A random sample (20%) of participants in the AITHS</p>                                               | <p>Inclusion: All self-identified Traveller families on the island of Ireland were invited to participate.</p> | <p>AITHS: health survey via an oral-visual data collection instrument</p>                                                                                           |
| 2<br>2.a | <p>(i) Slattery et al, 2011</p> <p><b>The point prevalence of diabetes, pre-diabetes and metabolic syndrome in Irish travellers</b></p> <p><b>Abstracts</b></p> <p>(ii) Slattery et al, 2011</p>                                                                                                                                                                                                                   | <p>Aim for all: to evaluate CVD risk factors and the point prevalence of diabetes, pre-diabetes and metabolic syndrome in the Irish Traveller population.</p> | <p>Observational pilot study- abstract only</p> | <p>N/S</p>        | <p>Travellers living along 'western seaboard' recruited from Galway and Western Traveller movements</p> | <p>Inclusion: Travellers (&gt;18 years)</p>                                                                    | <p>The following outcomes were evaluated; glucose levels, lipid profiles, oral glucose tolerance tests, blood pressure, weight, height and waist circumference.</p> |

1  
2  
3  
4  
5  
6  
7  
8  
9  
10  
11  
12  
13  
14  
15  
16  
17  
18  
19  
20  
21  
22  
23  
24  
25  
26  
27  
28  
29  
30  
31  
32  
33  
34  
35  
36  
37  
38  
39  
40  
41  
42  
43  
44  
45  
46

|                                                                                                                                                                                                                                                                                                                                                                                                                                                                                                                                                                                                                                   |  |  |  |  |  |  |  |
|-----------------------------------------------------------------------------------------------------------------------------------------------------------------------------------------------------------------------------------------------------------------------------------------------------------------------------------------------------------------------------------------------------------------------------------------------------------------------------------------------------------------------------------------------------------------------------------------------------------------------------------|--|--|--|--|--|--|--|
| <p><b>2.b</b></p> <p><b>The prevalence of diabetes, pre-diabetes and metabolic syndrome in Irish Travellers and the impact of lifestyle modification (abstract)</b></p> <p>(iii) Slattery, Brennan, Canny, Sweeney, Ward, O’ Shea and Dunne</p> <p><b>Cardiovascular health in the Irish Traveller community</b></p> <p>(iv) Slattery et al, 2011</p> <p><b>2.c</b></p> <p><b>The prevalence of diabetes, Pre-diabetes and the Metabolic Syndrome in Irish Travellers</b></p> <p>Tan et al, 2009</p> <p><b>2.d</b></p> <p><b>Traveller Health: Prevalence of Diabetes, Pre-Diabetes and the Metabolic Syndrome (abstract)</b></p> |  |  |  |  |  |  |  |
|-----------------------------------------------------------------------------------------------------------------------------------------------------------------------------------------------------------------------------------------------------------------------------------------------------------------------------------------------------------------------------------------------------------------------------------------------------------------------------------------------------------------------------------------------------------------------------------------------------------------------------------|--|--|--|--|--|--|--|

For peer review only

|   |                                                                                                                                                                                                                  |                                                                                                                            |                   |            |                                                                                             |                                                                                                                                                                                                         |                                                                                                                                                                                                                                                                                                  |
|---|------------------------------------------------------------------------------------------------------------------------------------------------------------------------------------------------------------------|----------------------------------------------------------------------------------------------------------------------------|-------------------|------------|---------------------------------------------------------------------------------------------|---------------------------------------------------------------------------------------------------------------------------------------------------------------------------------------------------------|--------------------------------------------------------------------------------------------------------------------------------------------------------------------------------------------------------------------------------------------------------------------------------------------------|
| 3 | Cullinane et al, 2020.<br><b>‘Phenotypic Variability in Leukoencehalopathy with Brain Calcifications and Cysts: Case reports of siblings from an Irish Traveller Family with a Homozygous SNORD118 Mutation’</b> | To describe a case report of an Irish traveller with a leukoencephalopathy and an inherited mutation in the SNORD118 gene. | Case report       | Not stated | Not stated                                                                                  | <u>Inclusion:</u><br>32 year old female Irish Traveller with leukoencephalopathy.                                                                                                                       | Clinical examination, family history, medical history including birth history, medications, histopathology investigations, genetic studies.                                                                                                                                                      |
| 4 | Flynn et al, 1989<br><b>Type II Hyperprolinaemia in a pedigree of Irish travellers (nomads)</b>                                                                                                                  | Aim: not stated but to investigate Type II hyperprolinaemia in Irish Travellers                                            | Descriptive study | Not stated | Not stated                                                                                  | <u>Inclusion:</u> not clearly stated but family of the ‘proband’ and close relatives                                                                                                                    | Testing of urine by two-dimensional paper chromatography, those showing prolinuria had blood samples taken in plain tubes and their serum or plasma proline concentrations were determined on a Locarte amino acid analyser.<br><br>In many cases no urine was collected but a blood sample was. |
| 5 | McCormick et al, 2001<br><b>Chronic inflammatory bowel disease and the ‘over-clean’ environment: Rarity in the Irish ‘Traveller’ community.</b>                                                                  | Aim: to estimate the prevalence of inflammatory bowel disease in the traveller population.                                 | Survey            | N/A        | Study was conducted in 11/26 counties in Ireland where 25/30 gastroenterologists were based | <u>Inclusion:</u> all gastroenterologists or surgeons working in the public health service in Ireland for at least three years at time of study, identified from the Irish Society of Gastroenterology. | Collected the number of members of the travelling community ever seen with inflammatory bowel disease and type of disease seen (Crohn’s and Ulcerative colitis).                                                                                                                                 |

|   |                                                                                                                                      |                                                                                                                                                     |                                          |                                                                                                                                                                                                                                                   |             |                                                                                                                                                                               |                                                                                                                                                                                                                                                                                                                                                                                                                                                                                |
|---|--------------------------------------------------------------------------------------------------------------------------------------|-----------------------------------------------------------------------------------------------------------------------------------------------------|------------------------------------------|---------------------------------------------------------------------------------------------------------------------------------------------------------------------------------------------------------------------------------------------------|-------------|-------------------------------------------------------------------------------------------------------------------------------------------------------------------------------|--------------------------------------------------------------------------------------------------------------------------------------------------------------------------------------------------------------------------------------------------------------------------------------------------------------------------------------------------------------------------------------------------------------------------------------------------------------------------------|
| 6 | <p>Keohane et al, 2020.</p> <p><b>Microbiome and health implications for ethnic minorities after enforced lifestyle changes.</b></p> | <p>Aim: to investigate whether recent lifestyle changes are associated with differences in the microbiome and risk factors for chronic disease.</p> | <p>Cross-sectional study.</p>            | <p>Within 30km radius of Cork city at one of five locations.</p> <p>Varied from permanent encampment, halting sites or social housing.</p> <p>NB 87% of participants were nomadic in childhood but their living conditions had since changed.</p> | <p>Cork</p> | <p><u>Inclusion:</u> None of the participants had taken antibiotics within 1 month and none were taking laxatives, corticosteroids, anti-inflammatories or anticoagulants</p> | <p>- Fecal microbiota of Irish Travellers were collected and compared with that of the settled background population in the same geographic locality and with that from individuals in other industrialised and non-industrialised countries.</p> <p>-Dietary habits were assessed via questionnaire</p> <p>-Body composition was assessed by DXA.</p> <p>-Well-being was assessed by the WHO-5 Well-Being Index</p> <p>-Personal, medical and family history was recorded</p> |
| 7 | <p>O’Toole et al, 2015.</p> <p><b>Tuberculosis incidence in the Irish Traveller population in Ireland from 2002 to 2013</b></p>      | <p>To examine data regarding TB notifications in Ireland from 2002 to 2013.</p>                                                                     | <p>Descriptive epidemiological study</p> | <p>N/S</p>                                                                                                                                                                                                                                        | <p>N/S</p>  | <p><u>Inclusion:</u></p> <p>-all cases of TB reported by the National TB Surveillance System and CID,</p> <p>-cases reported in the Census of 2002, 2006 and 2011 and</p>     | <p>Data were collected from National TB Surveillance System and Computerised Infections Disease Reporting system by the Health Surveillance Centre.</p> <p>Crude incidence rates (CIR) were calculated from the CSO and the AITHS data.</p>                                                                                                                                                                                                                                    |

|   |                                                                                    |                                                            |                     |               |                                    |                                                                                                                                                            |                                                                                                                                                                                                                                    |
|---|------------------------------------------------------------------------------------|------------------------------------------------------------|---------------------|---------------|------------------------------------|------------------------------------------------------------------------------------------------------------------------------------------------------------|------------------------------------------------------------------------------------------------------------------------------------------------------------------------------------------------------------------------------------|
|   |                                                                                    |                                                            |                     |               |                                    | -cases reported by the AITHS.                                                                                                                              | 5 year cumulative CIR values were calculated for 2009-2013.<br><br>Average incidence rates for 2002-2013 were calculated for each age group using CSO data.                                                                        |
| 8 | Nolan et al, 2017<br><b>Respiratory Health in an Irish Traveller Community</b>     | Aim: to assess respiratory health in Irish Travellers      | Observational study | N/S           | Travellers residing in West Dublin | Inclusion: Irish Travellers > 18 years                                                                                                                     | Subjective and objective data collected:<br><br>BMI, smoking history, respiratory symptoms, GP diagnosis of asthma and spirometry measures were taken                                                                              |
| 9 | Mac Gabhann, 2011<br><b>Voices Unheard. A study of Irish travellers in Prison.</b> | Aim: to explore issues faced by Irish Travellers in prison | Mixed methods study | England/Wales | Prisons in England/Wales           | <u>Inclusion-</u><br>-Irish travellers in prison<br>-prison staff in prisons in England and Wales.<br><br><u>Exclusion</u><br>-Young Offenders Institution | 1.Survey of Irish Travellers across the prison estate and a response form for prison staff involving prison officials and<br><br>2.A series of focus groups and semi-structured interviews with Irish travellers in seven prisons. |



**Supplementary Table 2: Details of Study Participants**

| No        | Author                                                             | Number of Participants                                                                                           | Age (Mean + SD)                                                                                               | Biological Sex                                                  |
|-----------|--------------------------------------------------------------------|------------------------------------------------------------------------------------------------------------------|---------------------------------------------------------------------------------------------------------------|-----------------------------------------------------------------|
| <b>1</b>  | AITHS                                                              | 4,141 adults interviewed                                                                                         | 5-14 years: 26%<br>15-24 years: 21%<br>25-39 years: 21%<br>40-64 years: 13%<br>65 years+: 3%                  | Males: 1,817, Females: 2,324                                    |
| <b>1a</b> | Abdalla et al, 2013                                                | Non-fatal injury data in Travellers: n = 1663 Travellers                                                         | Aged 15 years +                                                                                               | Males = 702 (42%), Females = 961 (58%)                          |
| <b>1b</b> | Whelan et al, 2010 (abstract)<br>Kelleher et al 2012               | n= 2065                                                                                                          | <30 years: 48% (n=945)<br>30-44: 28.6% (n=563)<br>45-64: 18.4% (n=362)<br>>65: 5.1% (n=100)                   | Males: 43.5% (n=898), Females: 56.5% (n=1166)                   |
| <b>1c</b> | (i) McGorrian et al, 2010 (abstract)<br>(ii) McGorrian et al, 2012 | 2023<br>Age, sex and CVD data was available on 1878 of the total sample of 2023<br>Comparator population: 10,364 | 18-29: 41.8% (n=784)<br>30-34: 31.6% (n=594)<br>45-59: 18% (n=338)<br>60-74: 7.5% (n=140)<br>>75: 1.2% (n=22) | Traveller population: Males: 32% (n=601), Females: 68% (n=1277) |

|      |                                                          |                                                                                                                                          |                                                                                                                                                                                     |                                                                                                        |
|------|----------------------------------------------------------|------------------------------------------------------------------------------------------------------------------------------------------|-------------------------------------------------------------------------------------------------------------------------------------------------------------------------------------|--------------------------------------------------------------------------------------------------------|
| 2a-e | 5 reports:<br>Tan et al, 2009, Slattery et al 2010, 2011 | 354 travellers were screened in the largest study<br>(Tan et al, n=47; Slattery 2010, n=187; Slattery 2011, n=285; Slattery 2011, n=353) | Mean age 37 ± 11 (SD)                                                                                                                                                               | Males: 127; Females: 227                                                                               |
| 3    | Cullinane, Lynch and Marnane, 2020                       | 1                                                                                                                                        | 32 years                                                                                                                                                                            | Female                                                                                                 |
| 4    | Flynn et al 2020                                         | *Whole sample: 312<br>Urine from 280, blood from 147.<br>Adult sample with Type II hyperprolinaemia: 7                                   | *Not stated for whole sample, but among 7 adults with Type II hyperprolinaemia the mean age was 27.9 years                                                                          | *Not stated for whole sample, but among 7 adults with Type II hyperprolinaemia, 4 females and 3 males. |
| 5    | McCormick and Manning, 2001                              | 25                                                                                                                                       | N/S                                                                                                                                                                                 | N/S                                                                                                    |
| 6    | Keohane et al, 2020                                      | 118                                                                                                                                      | 39 (+/-13 years sd)                                                                                                                                                                 | Males =53(44.9%), Females = 65 (55.1%)                                                                 |
| 7    | O' Toole et al, 2015                                     | 2060                                                                                                                                     | Travellers: majority of cases were in 0-34 yrs age group (mean of 26 years, median of 24 years)<br><br>General population: majority of cases were in the 25 to > 65 years age group | N/S                                                                                                    |

1  
2  
3  
4  
5  
6  
7  
8  
9  
10  
11  
12  
13  
14  
15  
16  
17  
18  
19  
20  
21  
22  
23  
24  
25  
26  
27  
28  
29  
30  
31  
32  
33  
34  
35  
36  
37  
38  
39  
40  
41  
42  
43  
44  
45  
46

|   |                      |                                                                                                                                             |                                                                                                                                                 |                                                                                   |
|---|----------------------|---------------------------------------------------------------------------------------------------------------------------------------------|-------------------------------------------------------------------------------------------------------------------------------------------------|-----------------------------------------------------------------------------------|
|   |                      |                                                                                                                                             | (mean of 43 years, median of 38 years)<br><br>Irish-born: majority of cases in 55 to >65 years age group (mean of 49 years, median of 49 years) |                                                                                   |
| 8 | Nolan et al, 2017    | 35                                                                                                                                          | Mean age 44 years (18-69)                                                                                                                       | Males: 16; Females: 19                                                            |
| 9 | Mac Gabhann, C, 2011 | 453 (0.6% of prison population). Of this, 296 survey forms were completed.<br><br>57 travellers participated in the focus groups/interviews | Age range of IT prisoners:<br>20-30: 39.5%<br>30-40: 29.5%<br>40-50: 17.1%<br>15-20:8.5%<br>50-60:4.3%<br>60-70:1.1%                            | Male = 93.6%, female = 6.4%<br><br>1 female prison was visited out of 7 in total. |

N/S: not stated

## Preferred Reporting Items for Systematic reviews and Meta-Analyses extension for Scoping Reviews (PRISMA-ScR) Checklist

| SECTION                           | ITEM | PRISMA-ScR CHECKLIST ITEM                                                                                                                                                                                                                                                                                  | REPORTED ON PAGE #                 |
|-----------------------------------|------|------------------------------------------------------------------------------------------------------------------------------------------------------------------------------------------------------------------------------------------------------------------------------------------------------------|------------------------------------|
| <b>TITLE</b>                      |      |                                                                                                                                                                                                                                                                                                            |                                    |
| Title                             | 1    | Identify the report as a scoping review.                                                                                                                                                                                                                                                                   | Page 1                             |
| <b>ABSTRACT</b>                   |      |                                                                                                                                                                                                                                                                                                            |                                    |
| Structured summary                | 2    | Provide a structured summary that includes (as applicable): background, objectives, eligibility criteria, sources of evidence, charting methods, results, and conclusions that relate to the review questions and objectives.                                                                              | Page 1                             |
| <b>INTRODUCTION</b>               |      |                                                                                                                                                                                                                                                                                                            |                                    |
| Rationale                         | 3    | Describe the rationale for the review in the context of what is already known. Explain why the review questions/objectives lend themselves to a scoping review approach.                                                                                                                                   | Page 3                             |
| Objectives                        | 4    | Provide an explicit statement of the questions and objectives being addressed with reference to their key elements (e.g., population or participants, concepts, and context) or other relevant key elements used to conceptualize the review questions and/or objectives.                                  | Page 4                             |
| <b>METHODS</b>                    |      |                                                                                                                                                                                                                                                                                                            |                                    |
| Protocol and registration         | 5    | Indicate whether a review protocol exists; state if and where it can be accessed (e.g., a Web address); and if available, provide registration information, including the registration number.                                                                                                             | Not applicable                     |
| Eligibility criteria              | 6    | Specify characteristics of the sources of evidence used as eligibility criteria (e.g., years considered, language, and publication status), and provide a rationale.                                                                                                                                       | Page 4                             |
| Information sources*              | 7    | Describe all information sources in the search (e.g., databases with dates of coverage and contact with authors to identify additional sources), as well as the date the most recent search was executed.                                                                                                  | Page 4                             |
| Search                            | 8    | Present the full electronic search strategy for at least 1 database, including any limits used, such that it could be repeated.                                                                                                                                                                            | Supplementary file 1/Extended data |
| Selection of sources of evidence† | 9    | State the process for selecting sources of evidence (i.e., screening and eligibility) included in the scoping review.                                                                                                                                                                                      | Page 4                             |
| Data charting process‡            | 10   | Describe the methods of charting data from the included sources of evidence (e.g., calibrated forms or forms that have been tested by the team before their use, and whether data charting was done independently or in duplicate) and any processes for obtaining and confirming data from investigators. | Page 4                             |
| Data items                        | 11   | List and define all variables for which data were sought and any assumptions and simplifications made.                                                                                                                                                                                                     | Page 4                             |
| Critical appraisal of individual  | 12   | If done, provide a rationale for conducting a critical appraisal of included sources of evidence; describe                                                                                                                                                                                                 | Not applicable                     |

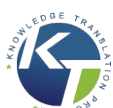

| SECTION                                       | ITEM | PRISMA-ScR CHECKLIST ITEM                                                                                                                                                                       | REPORTED ON PAGE #  |
|-----------------------------------------------|------|-------------------------------------------------------------------------------------------------------------------------------------------------------------------------------------------------|---------------------|
| sources of evidence§                          |      | the methods used and how this information was used in any data synthesis (if appropriate).                                                                                                      |                     |
| Synthesis of results                          | 13   | Describe the methods of handling and summarizing the data that were charted.                                                                                                                    | Page 5              |
| <b>RESULTS</b>                                |      |                                                                                                                                                                                                 |                     |
| Selection of sources of evidence              | 14   | Give numbers of sources of evidence screened, assessed for eligibility, and included in the review, with reasons for exclusions at each stage, ideally using a flow diagram.                    | Fig. 1              |
| Characteristics of sources of evidence        | 15   | For each source of evidence, present characteristics for which data were charted and provide the citations.                                                                                     | Tables              |
| Critical appraisal within sources of evidence | 16   | If done, present data on critical appraisal of included sources of evidence (see item 12).                                                                                                      | Not applicable      |
| Results of individual sources of evidence     | 17   | For each included source of evidence, present the relevant data that were charted that relate to the review questions and objectives.                                                           | Tables and page 5-6 |
| Synthesis of results                          | 18   | Summarize and/or present the charting results as they relate to the review questions and objectives.                                                                                            | Pages 5-6           |
| <b>DISCUSSION</b>                             |      |                                                                                                                                                                                                 |                     |
| Summary of evidence                           | 19   | Summarize the main results (including an overview of concepts, themes, and types of evidence available), link to the review questions and objectives, and consider the relevance to key groups. | Page 7              |
| Limitations                                   | 20   | Discuss the limitations of the scoping review process.                                                                                                                                          | Page 9              |
| Conclusions                                   | 21   | Provide a general interpretation of the results with respect to the review questions and objectives, as well as potential implications and/or next steps.                                       | Page 10             |
| <b>FUNDING</b>                                |      |                                                                                                                                                                                                 |                     |
| Funding                                       | 22   | Describe sources of funding for the included sources of evidence, as well as sources of funding for the scoping review. Describe the role of the funders of the scoping review.                 | Page 10             |

JBI = Joanna Briggs Institute; PRISMA-ScR = Preferred Reporting Items for Systematic reviews and Meta-Analyses extension for Scoping Reviews.

\* Where *sources of evidence* (see second footnote) are compiled from, such as bibliographic databases, social media platforms, and Web sites.

† A more inclusive/heterogeneous term used to account for the different types of evidence or data sources (e.g., quantitative and/or qualitative research, expert opinion, and policy documents) that may be eligible in a scoping review as opposed to only studies. This is not to be confused with *information sources* (see first footnote).

‡ The frameworks by Arksey and O'Malley (6) and Levac and colleagues (7) and the JBI guidance (4, 5) refer to the process of data extraction in a scoping review as data charting.

§ The process of systematically examining research evidence to assess its validity, results, and relevance before using it to inform a decision. This term is used for items 12 and 19 instead of "risk of bias" (which is more applicable to systematic reviews of interventions) to include and acknowledge the various sources of evidence that may be used in a scoping review (e.g., quantitative and/or qualitative research, expert opinion, and policy document).

From: Tricco AC, Lillie E, Zarin W, O'Brien KK, Colquhoun H, Levac D, et al. PRISMA Extension for Scoping Reviews (PRISMA-ScR): Checklist and Explanation. *Ann Intern Med.* 2018;169:467–473. doi: 10.7326/M18-0850.

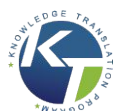

St. Michael's

Inspired Care.  
Inspiring Science.

For peer review only - <http://bmjopen.bmj.com/site/about/guidelines.xhtml>

# BMJ Open

## Scoping review on Physical Health Conditions in Mincéirs - Irish Travellers

|                                 |                                                                                                                                                                                                                                                                                             |
|---------------------------------|---------------------------------------------------------------------------------------------------------------------------------------------------------------------------------------------------------------------------------------------------------------------------------------------|
| Journal:                        | <i>BMJ Open</i>                                                                                                                                                                                                                                                                             |
| Manuscript ID                   | bmjopen-2022-068876.R1                                                                                                                                                                                                                                                                      |
| Article Type:                   | Original research                                                                                                                                                                                                                                                                           |
| Date Submitted by the Author:   | 19-Apr-2023                                                                                                                                                                                                                                                                                 |
| Complete List of Authors:       | Kennedy, Fiona; Trinity College Dublin, School of Medicine<br>Ward, Amy; Independent Public and Patient Expert<br>Mockler, David; Trinity College Dublin, John Stearne Library<br>Villani, Jacopo; Health Service Executive<br>Broderick, Julie; Trinity College Dublin, School of Medicine |
| <b>Primary Subject Heading</b>: | Public health                                                                                                                                                                                                                                                                               |
| Secondary Subject Heading:      | Cardiovascular medicine, Respiratory medicine                                                                                                                                                                                                                                               |
| Keywords:                       | PUBLIC HEALTH, PRIMARY CARE, Coronary heart disease < CARDIOLOGY                                                                                                                                                                                                                            |
|                                 |                                                                                                                                                                                                                                                                                             |

SCHOLARONE™  
Manuscripts



I, the Submitting Author has the right to grant and does grant on behalf of all authors of the Work (as defined in the below author licence), an exclusive licence and/or a non-exclusive licence for contributions from authors who are: i) UK Crown employees; ii) where BMJ has agreed a CC-BY licence shall apply, and/or iii) in accordance with the terms applicable for US Federal Government officers or employees acting as part of their official duties; on a worldwide, perpetual, irrevocable, royalty-free basis to BMJ Publishing Group Ltd ("BMJ") its licensees and where the relevant Journal is co-owned by BMJ to the co-owners of the Journal, to publish the Work in this journal and any other BMJ products and to exploit all rights, as set out in our [licence](#).

The Submitting Author accepts and understands that any supply made under these terms is made by BMJ to the Submitting Author unless you are acting as an employee on behalf of your employer or a postgraduate student of an affiliated institution which is paying any applicable article publishing charge ("APC") for Open Access articles. Where the Submitting Author wishes to make the Work available on an Open Access basis (and intends to pay the relevant APC), the terms of reuse of such Open Access shall be governed by a Creative Commons licence – details of these licences and which [Creative Commons](#) licence will apply to this Work are set out in our licence referred to above.

Other than as permitted in any relevant BMJ Author's Self Archiving Policies, I confirm this Work has not been accepted for publication elsewhere, is not being considered for publication elsewhere and does not duplicate material already published. I confirm all authors consent to publication of this Work and authorise the granting of this licence.

1  
2  
3 **Title page**  
4

5 **Title: Scoping review on Physical Health Conditions in Mincéirs - Irish Travellers**  
6  
7

8 **Author and co-author names:**  
9

10 Kennedy F<sup>1</sup>, Ward A<sup>2</sup>, Mockler D<sup>3</sup>, Villani J<sup>4</sup>, Broderick J<sup>1</sup>,  
11  
12

13 <sup>1</sup>School of Medicine, Trinity College Dublin, Ireland.  
14

15 <sup>2</sup>Independant Public and Patient Expert, Belfast, UK.  
16  
17

18 <sup>3</sup>John Stern Library, Trinity College Dublin, Ireland.  
19

20 <sup>4</sup>Health Service Executive, Dublin, Ireland.  
21  
22  
23  
24  
25

26 **Corresponding author details:**  
27

28 Name: Dr. Julie Broderick,  
29

30 Address: Trinity Centre for Health Sciences, St. James's Hospital, Dublin D08W9RT, Ireland  
31  
32

33 E-mail: [broderju@tcd.ie](mailto:broderju@tcd.ie)  
34

35 Telephone: +353 1 8962110  
36  
37

38 Fax number: no fax  
39  
40  
41  
42

43 **Keywords:** Irish travellers, physical health, Ethnic minority, inequality  
44

45 **Word count:** 2547  
46  
47  
48  
49  
50  
51  
52  
53  
54  
55  
56  
57  
58  
59  
60



## Abstract

**Objective:** The objective of this scoping review was to collate physical health conditions in Mincéirs - Irish Travellers

**Design:** Scoping review

**Search Strategy and charting method:** MEDLINE/PubMed, EMBASE, PEDro, AMED, CINAHL, PsycINFO, SCOPUS as well as reports and grey literature were searched for primary data reporting physical health conditions of Irish Travellers up to 04.04.23. Data was extracted, described and organised meaningfully into tables according to reported physical health conditions.

**Eligibility criteria:** The population was Travellers. The concept referred to physical health conditions. The context was Irish Travellers based in any location or setting. Exclusion criteria was data/research other than primary data relating to physical health conditions of Irish Travellers.

**Results:** From 198 citations generated from the database search, 11 unique studies (20 reports) were included in this scoping review, including n=7,397 participants. Driven by the data, physical health conditions were categorised into cardiovascular diseases, respiratory diseases, injuries/musculoskeletal/arthritis disorders, genetic disorders and gut/bowel conditions. This review showed that the metabolic syndrome, asthma, bronchitis, tuberculosis and intentional injuries were 2-3 times more prevalent in Irish Travellers compared to the background population. Genetic conditions were also described in a proportion of Travellers.

**Conclusions;** Overall Irish Travellers experience a disproportionate burden of physical health conditions compared to background populations. Health care providers need to be aware of the unique physical health burden experienced by many Irish Travellers. Multifaceted strategies are needed to improve the health profile of this vulnerable and marginalised group.

## Strengths and limitations of this study

- The methods for this scoping review were informed by the scoping review guidance from the Joanna Briggs Institute and it was reported according to the Preferred Reporting Items for Systematic Review and Meta-Analyses extension for Scoping Reviews (PRISMA-ScR) Checklist.
- Screening and data extraction processes were performed in duplicate.
- Stakeholder involvement was integral to this review, as a member of the Travelling community was one of the co-authors of this work.
- This was the first time all studies, reports and grey literature were comprehensively reviewed and collated to provide a broad picture of physical health conditions of Irish Travellers.
- As is the convention in scoping reviews, quality assessment was not undertaken – results must be interpreted in light of this.

## Introduction

Irish Travellers or 'Mincéirs', as known in their language of Shelta<sup>1,2</sup>, are a traditionally nomadic minority group primarily based on the island of Ireland<sup>3</sup>. They also reside in the UK with smaller populations in Europe and the USA. The term 'Travellers' is used as a generic term to refer to people who have a historical and cultural tradition based on a mobile lifestyle and includes English and Welsh Gypsies, Irish Travellers and Scottish Travellers. Each of these groups has a separate ethnic identity that is particularly evident from their different languages but they share many aspects of a common cultural identity as traditional Travellers or Romani people<sup>3,4</sup>. In this review we specifically included 'Irish Travellers' only. As Irish Travellers in Ireland are known as 'Travellers' rather than 'Irish Travellers', the term 'Travellers' is used hereafter, recognising that the authors are referring to Travellers of Irish descent.

The number of Travellers recorded in the Irish Census of 2016 was reported to be 30,987 accounting for 0.7% of the general population<sup>5</sup>. In the 2011 Census for England and Wales,

1  
2  
3 58,000 people identified as Gypsy or Traveller (Irish origin) which may be an  
4 underestimation of the actual number<sup>4</sup>.  
5  
6

7 Travellers have been recognised formally as a distinct indigenous ethnic group in Ireland  
8 since 2017, which should have marked a positive step towards an inclusive society<sup>6</sup>. Yet,  
9 Travellers are 22 times more likely to experience discrimination than the general  
10 population<sup>7</sup> and they remain a severely marginalised group<sup>8 9</sup>. Consequently, Travellers face  
11 poor health and experience a higher burden of mortality and morbidity than the general  
12 population<sup>9</sup>.  
13  
14  
15  
16  
17

18  
19 Traveller life expectancy has been reported to be 66 years, 11.5-15.1 years less than that of  
20 the general population<sup>9</sup>. The infant mortality rate is 3.6 times higher than the general  
21 population<sup>9</sup> and ten percent of Travellers do not reach their 2nd birthday<sup>10</sup>. The  
22 disproportionate mortality may be due to poor health as well as other factors such as  
23 inadequate housing, education and literacy levels<sup>9</sup>. Mental health disorders are prevalent,  
24 with reported suicide rates six-seven fold higher than the general population<sup>9</sup>. Physical  
25 health appears to be poorer<sup>9</sup> but the scale and range of physical health conditions  
26 experienced by Travellers is not well known. The aim of this review was to summarise  
27 available data and categorise physical health conditions in Travellers. Due to the exploratory  
28 nature and lack of delineation of this area identified by an initial test review, a scoping  
29 review methodology was chosen.  
30  
31  
32  
33  
34  
35  
36  
37  
38  
39  
40  
41  
42

43 The objectives of this review were;

- 44  
45 (i) To explore the extent, breadth and nature of the literature with regards to physical health  
46 conditions experienced by Travellers.  
47  
48  
49 (ii) To categorise the evidence about physical health in Travellers.  
50  
51  
52 (iii) To compare physical health conditions of Travellers to the background population where  
53 possible.  
54  
55  
56  
57  
58  
59  
60

## Methodology

The protocol for this review was published on Open Science Framework (<https://osf.io/v6etg/>). This review followed the Joanna Briggs Institute's (JBI) methodology for scoping reviews<sup>11</sup> and was also informed by the original framework of Arksey<sup>12</sup>, and enhancements proposed by Levac<sup>13</sup>. It was checked against the Preferred Reporting Items for Systematic reviews and Meta-Analyses extension for Scoping Reviews (PRISMA-ScR) Checklist<sup>14</sup>. The six stage framework developed by Arksey and O' Malley (2005)<sup>12</sup> was used to structure this review.

Stage one refers to identifying the research question. The primary research question was; what is known about the physical health of Travellers. The secondary research question was; how does the physical health of Travellers compare to the background population, where this information was available.

Stage two refers to identifying relevant studies. A comprehensive search strategy was developed collaboratively with a skilled research librarian (DM). The following electronic databases were searched: MEDLINE/PubMed, EMBASE, PEDro, AMED, CINAHL, PsycINFO, SCOPUS (see extended data). The search strategy was generated from a combination of free text search terms, text words, Medical Subject Headings (MeSH) terms and keywords with Boolean operators. The full search details are outlined in Supplementary Box 1. Authors of abstracts included in this review were contacted to ascertain if full text versions were available. Reference lists of included studies were examined for relevant studies. Grey literature was searched using the CADTH Grey Matters tool and the following websites were checked; Lenus, ProQuest E-Thesis Portal and RIAN. For each of these sources the terms 'Travellers' and 'Health' were searched. For each, the website was 'hand searched' for potentially relevant documents. The first ten pages of each search's hits were reviewed for potentially relevant material. A targeted search of Google Scholar and WorldCat search engines was also performed.

Stage three refers to study selection. This was based on the Population, Concept, Context (PPC) mnemonic<sup>11</sup>. The population was Travellers. The concept referred to physical health conditions. There is no single definition of physical health conditions. We took this to mean any condition, including a disease or event (eg injury) that impacts the physical health

1  
2  
3 system. The context was quite broad and included Irish Travellers based in any location or  
4 setting. It was originally envisaged that this review would encompass 'health' in a more  
5 holistic way including mental and physical health conditions. Given the large scope of a  
6 review including both dimensions of health, a pragmatic decision was taken to consider  
7 physical health conditions only in this review and refine the search strategy appropriately<sup>15</sup>  
8  
9  
10  
11  
12  
13  
14  
15  
16  
17  
18  
19  
20  
21  
22  
23  
24  
25  
26  
27  
28  
29  
30  
31  
32  
33  
34  
35  
36  
37  
38  
39  
40  
41  
42  
43  
44  
45  
46  
47  
48  
49  
50  
51  
52  
53  
54  
55  
56  
57  
58  
59  
60

This included primary data documenting prevalence of physical health conditions and as well as perceptions of Travellers regarding physical health conditions experienced. Only English language sources were searched as it was expected the literature would be concentrated mainly in Ireland and the UK/other English-speaking jurisdictions. No date restriction was applied to generate a purposefully broad scope of the available literature. To meet the objective of the scoping review questions in this study, both quantitative and qualitative study designs were included, although it was expected data would be primarily quantitative in nature. Studies, regardless of study design, which examined physical health conditions of Travellers (>18 years) as a primary or secondary outcome measure were included. If intervention studies were included, only baseline data was extracted. Exclusion criteria were data which did not related to physical health conditions of Irish Travellers.

Duplications were removed and studies were imported into Covidence<sup>TM</sup> for title and abstract screening which took place independently by two reviewers (JB/FK). Both authors then conducted a full-text evaluation. If necessary, discrepancies were resolved by consensus by including a third author.

Stage four refers to charting the data. Relevant data pertaining to physical health conditions of Travellers was retrieved. Two reviewers (J.B. and F.K.) independently extracted data using a bespoke data extraction instrument<sup>11</sup>. The data extraction process took place from October 2021 – March 2022. The data extraction instrument was designed by review authors (JB and FK) based on the JBI template source of evidence details, characteristics, and results. Two review authors (JB and FK) independently extracted data from the first ten studies using the initially developed data extraction form and met to ascertain its suitability. Minor changes to the data extraction tool were made at this stage. The data extraction instrument collected the following data relating to included studies (author, title, year of publication, study aims/objectives, research design, living arrangements, location of participants, inclusion/exclusion criteria, data collection method, number of participants,

1  
2  
3 age (mean and standard deviation), biological sex, details of physical health condition  
4 reported and physical health conditions in the background comparison population. Any  
5 differences were resolved by consensus discussion. A third author (D.M.) was available if  
6  
7  
8  
9 disparities emerged between reviewers.

10  
11 Stage five refers to collating, summarizing and reporting of results. Data were reported for  
12 each selected study within each category as agreed on in the previous stage. Findings were  
13 mapped to summarize the range of evidence to present the breadth and depth of the  
14 field<sup>13</sup>. Tables were also presented to outline the research findings as defined in Stage four.  
15  
16  
17  
18 As per scoping review methodological enhancements proposed by Levac<sup>13</sup>, results were  
19 presented numerically and in a data driven approach were categorized meaningfully into  
20 subcategories of physical health conditions. Where available, data were compared to the  
21 background population. Implications for policy, practice and research were identified.  
22  
23  
24  
25  
26  
27  
28 Entries were independently checked by two authors (JB and FK).

### 28 **Patient and Public Involvement**

29  
30  
31 Stage six refers to patient and public involvement. Stakeholder/public involvement was  
32 integral to this review. The initial research question was generated from the principal author  
33 who has an interest broadly in the physical health of marginalised groups. In the planning  
34 phase, the research question evolved and was refined by engaging informally with the  
35 research team and a member of the Travelling community (AW) about this topic. In  
36  
37  
38  
39 conversation, AW identified the poor physical health and prevalence of physical health  
40 conditions among many Travellers which consolidated the purpose of conducting this  
41  
42  
43  
44 review. AW was then personally invited to join the review team. Her involvement began  
45 after the initial database search and continued throughout the data synthesis and write-up  
46  
47  
48  
49 phases. A number of online meetings took place during which AW shared her perspectives  
50 verbally and in written form on early results, drafts and conclusions of the review as they  
51  
52  
53 emerged.

### 53 **Results**

#### 54 Studies identified

55  
56  
57  
58  
59  
60

1  
2  
3 The original search was performed on 09.03.21 (re-run 02.11.21 and 04.04.23). After  
4 removal of duplicates, 197 studies were identified. After excluding irrelevant studies, a total  
5 of 11 studies and 18 reports were deemed eligible for inclusion. Quantitative studies  
6 predominated (n=8), with two qualitative studies and one mixed methods study. Three were  
7 reports generated from the grey literature search while the remaining were generated from  
8 the systematic database search. The PRISMA flow chart summarises the search strategy  
9 (Figure 1).  
10  
11  
12  
13  
14  
15  
16  
17  
18  
19

20 Figure 1: PRISMA flow diagram ABOUT HERE  
21

22  
23 Study characteristics are shown in Supplementary Table 1. Over seven thousand participants  
24 (n=7397) were included with more than half (n=4,141) from the AITHS<sup>9</sup>. One study took part  
25 in the UK<sup>16</sup> and the remaining studies were based in Ireland, North and South. Living  
26 arrangements of participants were reported in three studies. In one study, a quarter (n=515)  
27 lived in a caravan, a trailer or a chalet<sup>17</sup> and in another, participants' accommodation  
28 included encampments, halting sites and social housing<sup>18</sup>. All (Traveller) participants in Mac  
29 Gabhann's study (n=296) resided in prisons in England and Wales<sup>16</sup>.  
30  
31  
32  
33  
34  
35

36 Participants' characteristics are shown in Supplementary Table 2. The majority of studies  
37 included males and females with overall 61% of participants female. The UK based study  
38 included mostly male participants (93.6% male)<sup>16</sup> while one study was female only<sup>19</sup>. The age  
39 profile of participants was predominantly young, with the majority in their second, third and  
40 fourth decade.  
41  
42  
43  
44  
45

46 Using a data-driven approach, physical health conditions were categorized  
47 in the following way; cardiovascular disease (CVD), respiratory, genetic,  
48 injuries/musculoskeletal/arthritis disorders and gut/bowel conditions. Tables 1-4 summarise  
49 physical health conditions from included primary studies.  
50  
51  
52  
53  
54  
55  
56  
57  
58  
59  
60

1  
2  
3  
4  
5  
6  
7  
8  
9  
10  
11  
12  
13  
14  
15  
16  
17  
18  
19  
20  
21  
22  
23  
24  
25  
26  
27  
28  
29  
30  
31  
32  
33  
34  
35  
36  
37  
38  
39  
40  
41  
42  
43  
44  
45  
46  
47  
48  
49  
50  
51  
52  
53  
54  
55  
56  
57  
58  
59  
60

For peer review only



**Table 1: Cardiovascular diseases**

| <b>Physical Health Variable</b>  | <b>Authors</b>                     | <b>Result</b>                                                                        |
|----------------------------------|------------------------------------|--------------------------------------------------------------------------------------|
| <b>High tri-glyceride levels</b> | Tan et al 2009 <sup>17</sup>       | High triglyceride level 23% (n=49%), males 89% (n=8), females 40% (n=15)             |
| <b>HDL/LDL</b>                   | Tan et al 2009 <sup>17</sup>       | Low HDL level, 62% (n=29), males 78%, females 58% (n=22)                             |
| <b>Impaired Fasting Glucose</b>  | Tan et al 2009 <sup>17</sup>       | Total: 19% (n=9), Males: 22% (n=2), females 18% (n=7)                                |
| <b>Angina</b>                    | AITHS, 2012 <sup>9</sup>           | 4.3% Travellers, ROI (background population 2%)<br>2.1% Travellers, Northern Ireland |
| <b>Diabetes Mellitus</b>         | AITHS, 2012 <sup>9</sup>           | 6.1% Travellers, ROI (background population 3%)<br>6.1% Travellers, Northern Ireland |
|                                  | Slattery et al, 2011 <sup>20</sup> | 5.9% Traveller sample (background population 4.3%)                                   |
|                                  | Tan et al 2009 <sup>17</sup>       | 8.5% Traveller sample (background population 4.3%)                                   |
| <b>Pre-diabetes</b>              | Slattery et al, 2011 <sup>21</sup> | 9.3% (background population 6.2%)                                                    |
|                                  | Tan et al 2009 <sup>17</sup>       | 11.6% Traveller sample (background population 6.3%)                                  |
| <b>'Heart Attack'</b>            | AITHS 2012 <sup>9</sup>            | 2.3% Travellers, ROI (background population <1%)                                     |

|                                               |                                             |                                                                                                                                                                                                                                                                                                                                                                                                                                                                                                                                                                                                                                                                                                                                                                                                                                                                                                                            |
|-----------------------------------------------|---------------------------------------------|----------------------------------------------------------------------------------------------------------------------------------------------------------------------------------------------------------------------------------------------------------------------------------------------------------------------------------------------------------------------------------------------------------------------------------------------------------------------------------------------------------------------------------------------------------------------------------------------------------------------------------------------------------------------------------------------------------------------------------------------------------------------------------------------------------------------------------------------------------------------------------------------------------------------------|
|                                               |                                             | 2.1% Travellers, Northern Ireland                                                                                                                                                                                                                                                                                                                                                                                                                                                                                                                                                                                                                                                                                                                                                                                                                                                                                          |
| <b>Systolic BP <math>\geq</math> 130mmHg</b>  | Tan et al 2009 <sup>17</sup>                | Total 43% (n=20), Males: 22% (n=2), Females 47% (n=18)                                                                                                                                                                                                                                                                                                                                                                                                                                                                                                                                                                                                                                                                                                                                                                                                                                                                     |
| <b>Diastolic BP <math>\geq</math> 85 mmHg</b> | Tan et al 2009 <sup>17</sup>                | Total 38% (n=18), Males: 44% (n=4), Females 37% (n=14)                                                                                                                                                                                                                                                                                                                                                                                                                                                                                                                                                                                                                                                                                                                                                                                                                                                                     |
| <b>Metabolic Syndrome</b>                     | Slattery et al 2011 <sup>20</sup>           | 39.3% Traveller sample (background population 21%)                                                                                                                                                                                                                                                                                                                                                                                                                                                                                                                                                                                                                                                                                                                                                                                                                                                                         |
|                                               | Tan et al 2009 <sup>17</sup>                | 53.2% Traveller sample (background population 21.0%)                                                                                                                                                                                                                                                                                                                                                                                                                                                                                                                                                                                                                                                                                                                                                                                                                                                                       |
| <b>Self-reported CVD</b>                      | McGorrian et al, 2010/2012 <sup>22,23</sup> | <p>-Self-reported CVD was 5.6% (5.8% in men and 5.5% in women), compared to 16.1% in the general Irish population.</p> <p>-The prevalence of CVD increased with age and the Travellers who reported CVD were older (mean age 54.06 <math>\pm</math>14.48 V 34.99 <math>\pm</math>13.85).</p> <p>-No significant difference in the prevalence of reported CVD, hypercholesterolaemia and hypertension between the comparator groups was found.</p> <p>-However, diabetes, smoking, consumption of salt and fried food and physical inactivity is more frequent in Travellers.</p> <p>-Significant positive association was found between CVD and age, high cholesterol, hypertension, diabetes and current/former V never smoking, drinking alcohol and increasing discrimination.</p> <p>-Significant negative association was found between CVD and self-rated health, consumption of fried food and trust of others.</p> |
|                                               | Kelleher et al, 2012 <sup>24</sup>          | -Self-reported BP, cholesterol, diabetes screening by GP (48%, n=1996)                                                                                                                                                                                                                                                                                                                                                                                                                                                                                                                                                                                                                                                                                                                                                                                                                                                     |

ROI: Republic of Ireland

Table 2: Respiratory diseases

| Disease and variable measured                                                                                 | Authors                                 | Result                                                                                                                                                                                                                                                                                                                                                                                                                                                                                                                                                                                                                                                                                                                                                                                                                                                                                                                                                                                                                                                                                                                                                                                                                                                                                                                                                                                                                                                                        |
|---------------------------------------------------------------------------------------------------------------|-----------------------------------------|-------------------------------------------------------------------------------------------------------------------------------------------------------------------------------------------------------------------------------------------------------------------------------------------------------------------------------------------------------------------------------------------------------------------------------------------------------------------------------------------------------------------------------------------------------------------------------------------------------------------------------------------------------------------------------------------------------------------------------------------------------------------------------------------------------------------------------------------------------------------------------------------------------------------------------------------------------------------------------------------------------------------------------------------------------------------------------------------------------------------------------------------------------------------------------------------------------------------------------------------------------------------------------------------------------------------------------------------------------------------------------------------------------------------------------------------------------------------------------|
| <p><b>TB:</b> incidence rate</p>                                                                              | <p>O'Toole et al, 2015<sup>25</sup></p> | <ul style="list-style-type: none"> <li>- Higher incidence rate and younger age in Irish travellers than white Irish-born and general population:</li> <li>- CIR of TB in the Traveller population was &lt;5/100000 population per annum from 2002-2009. This increased after 2010 and CIR &gt;10/100000 population per annum 2011-2013.</li> <li>- From 2002-2013, the CIR of TB decreased in the general population (10.5/100000 in 2002 to 8.3/100000 in 2013).</li> <li>- CIR for TB in Travellers was about 3-fold higher than that of white born Irish population in 2011 and 2012.</li> <li>- In 2013, the CIR in Travellers increased to 40.6/100000 following an outbreak.</li> <li>- 5-year cumulative CIR 2009-2013:               <ul style="list-style-type: none"> <li>o Travellers: 81.4/100000</li> <li>o General pop: 45.5/100000</li> <li>o White Irish-born: 27.3/100000</li> </ul> </li> <li>- When AITHS population data was used to calculate CIR rather than the CSO Census data, the CIR was lower. Regardless of the method of data collection of CIR, the rate was still higher in Irish travellers than the general population/white Irish born.</li> <li>- Average incidence by age was higher for the Traveller population, majority in 0-34 age group, compared to the general population where the majority was in the 25-65 age group and in the white Irish-born population where the majority was in the 55 to &gt; 65 age group.</li> </ul> |
| <p><b>COPD:</b> number of smokers, presence of respiratory symptoms, diagnosis of asthma &amp; spirometry</p> | <p>Nolan et al, 2017<sup>26</sup></p>   | <ul style="list-style-type: none"> <li>- 41% were current smokers, 6/14 non-smokers regularly exposed to passive smoke</li> <li>- 86% of smokers reported respiratory symptoms including cough, wheeze and shortness of breath</li> <li>- 10/35 had GP diagnosis of asthma</li> <li>- 23% (7/30) had obstructive pattern</li> </ul>                                                                                                                                                                                                                                                                                                                                                                                                                                                                                                                                                                                                                                                                                                                                                                                                                                                                                                                                                                                                                                                                                                                                           |

|                           |                          |                                                                                       |
|---------------------------|--------------------------|---------------------------------------------------------------------------------------|
| <b>Chronic bronchitis</b> | AITHS, 2012 <sup>9</sup> | - 12% Travellers ROI, 9.4% Travellers Northern Ireland, (background population 3%)    |
| <b>Asthma</b>             | AITHS, 2012 <sup>9</sup> | - 12.5% Travellers ROI, 25.7% Travellers Northern Ireland, (background population 6%) |

**Table 3: Injuries/Musculoskeletal/Arthritic disorders**

| <b>Details of non-fatal injuries</b>                                   | <b>Authors</b>                    | <b>Result</b>                                                                                                                                                                                                                                                                                                                                                |
|------------------------------------------------------------------------|-----------------------------------|--------------------------------------------------------------------------------------------------------------------------------------------------------------------------------------------------------------------------------------------------------------------------------------------------------------------------------------------------------------|
| <b>'Back condition'</b>                                                | AITHS, 2012 <sup>9</sup>          | - 30.4% Travellers, ROI (background population 16%)<br>- 25.2% Travellers, Northern Ireland                                                                                                                                                                                                                                                                  |
| <b>Arthritis</b>                                                       | AITHS, 2012 <sup>9</sup>          | - 13.8% Travellers, ROI (background population 11%)<br>- 13.2% Travellers, Northern Ireland                                                                                                                                                                                                                                                                  |
| <b>Injury<br/>(prevalence of injury and intentional/unintentional)</b> | Abdalla et al, 2013 <sup>27</sup> | - Travellers had a higher incidence of intentional injuries, SIR = 224 for intentional injuries (male = 181, female = 268)<br>- Travellers had a lower incidence of unintentional injury than the general population: SIR = 44 (male = 42, female = 46).<br>- Travellers over 65 years were twice as likely to report an injury than the general population. |

1  
2  
3  
4  
5  
6  
7  
8  
9  
10  
11  
12  
13  
14  
15  
16  
17  
18  
19  
20  
21  
22  
23  
24  
25  
26  
27  
28  
29  
30  
31  
32  
33  
34  
35  
36  
37  
38  
39  
40  
41  
42  
43  
44  
45  
46

|                                                                                                                   |                                   |                                                                                                                                                                                                                                                                                                                                |
|-------------------------------------------------------------------------------------------------------------------|-----------------------------------|--------------------------------------------------------------------------------------------------------------------------------------------------------------------------------------------------------------------------------------------------------------------------------------------------------------------------------|
|                                                                                                                   |                                   | <ul style="list-style-type: none"> <li>○ Overall injury SIR for Travellers aged 15-64 years = 59 &amp; 65 years +=208</li> <li>○ Intentional injury SIR for Travellers &gt;65 years = 517</li> <li>○ Unintentional injury SIR for Travellers &gt;65years= 137. Overall injury SIR for Travellers &gt;65years = 208.</li> </ul> |
| <b>Injury</b><br><b>(Question from Dimension 4 Lifestyle and health behaviour of the health status interview)</b> | Kelleher et al 2012 <sup>24</sup> | ‘Free of injuries in the last 2 years vs. one or more injury’: 88.7% (n=1800)                                                                                                                                                                                                                                                  |

*SIR: standardised incidence ratio (ratio of the observed number of Traveller non-fatal injuries to that expected if Travellers experienced the age-specific retrospective incidence of non-fatal injury of the general population)*

**Table 4: Genetic diseases, other conditions and self-rated health**

| Details of Genetic disease                |                                                              | Author                                           | Result                                                                                                                                                                                                                                                                                                                                                                                                                                                                                                                                                   |
|-------------------------------------------|--------------------------------------------------------------|--------------------------------------------------|----------------------------------------------------------------------------------------------------------------------------------------------------------------------------------------------------------------------------------------------------------------------------------------------------------------------------------------------------------------------------------------------------------------------------------------------------------------------------------------------------------------------------------------------------------|
| <b>Phenotype</b>                          | Medical history, clinical observation & physical examination | Cullinane, Lynch and Marnane, 2020 <sup>28</sup> | Case of leukoencephalopathy described. Patient presented with short stature, pes planus, hypotonia, history of osteogenic sarcoma<br><br>Participants' medical history: Epilepsy, multiple cerebral cysts (removed by craniotomy/cyst excisions over the course of 15 years from age 5), left ventriculo-peritoneal shunt inserted and later removed, multiple vascular malformations of the capillary-cavernous type with associated haematomas, surrounding gliosis, hemosiderin deposition, Rosenthal fibres and areas of white matter calcification. |
|                                           | Blood & urine testing                                        | Flynn et al 1989 <sup>29</sup>                   | Type II hyperprolinaemia (n=13, including 7 adults)<br><br>Mild hyperprolinaemia (n=50, proportion of adults unclear)<br><br>Seizures from hyperprolinaemia: 4 adults suffered grand mal seizures, 1 of whom had a severe mental handicap, 1 suffered from petit mal seizures.                                                                                                                                                                                                                                                                           |
| <b>Genotype</b>                           | Whole exome sequencing                                       | Cullinane, Lynch and Marnane, 2020 <sup>28</sup> | Identified a homozygous variant of the SNORD118 gene. The sister of this case, with milder symptoms was homozygous for the same variant.                                                                                                                                                                                                                                                                                                                                                                                                                 |
| <b>Other conditions</b>                   |                                                              |                                                  |                                                                                                                                                                                                                                                                                                                                                                                                                                                                                                                                                          |
| <b>Chronic inflammatory bowel disease</b> |                                                              | McCormick et al, 2001 <sup>30</sup>              | No recorded traveller with idiopathic inflammatory bowel disease                                                                                                                                                                                                                                                                                                                                                                                                                                                                                         |
| <b>Cancer</b>                             |                                                              | AITHS, 2012 <sup>9</sup>                         | 1% Travellers, ROI (background population 1%)<br>0.3% Travellers, Northern Ireland                                                                                                                                                                                                                                                                                                                                                                                                                                                                       |
| <b>Physical Health problems</b>           |                                                              | Mac Gabhann <sup>16</sup>                        | Out of sample n=281 Travellers in a UK prison, the following physical health conditions were reported.<br>asthma (n=12), 'back' problems (n=10), epilepsy (n=9) and arthritis (n=7)                                                                                                                                                                                                                                                                                                                                                                      |

|                                                                                         |                                          |                  |
|-----------------------------------------------------------------------------------------|------------------------------------------|------------------|
| <b>Self-rated Health:</b>                                                               |                                          |                  |
| 'Chronic health condition diagnosed by GP'                                              | Kelleher et al, 2012 <sup>24</sup>       | 41.5% (n = 2022) |
| Physical Health not good $\geq$ 1 day in last month                                     | (Dimension 6 in Health Status Interview) | 59.3% (n=1843)   |
| Daily activity or work limited due to a long-term illness, health problem or disability |                                          | 17.2% (2012)     |

\*Doctor diagnosed illness in previous 12 months

Three studies reported cardiovascular diseases (Table 1). Tan et al, (2009)<sup>17</sup> reported the following CVD risk factors among study participants (n=47); high triglyceride levels (23%), low HDL cholesterol levels (62%), impaired fasting glucose levels (19%) and hypertension (systolic BP  $\geq$  130mmHg 43% and diastolic BP  $\geq$  85mmHg 38%). The prevalence of diabetes, pre-diabetes and the metabolic syndrome evaluated in a series of pilot studies was higher than the general population<sup>20</sup>. The incidence of metabolic disease was over twice as high among Travellers (53.2%) compared to the background population (21%)<sup>20</sup>. Self-report CVD was approximately 5%, compared to a self-reported CVD rate of 16.1% in the general population<sup>9</sup>.

Two studies explored respiratory conditions (Table 2)<sup>25 26</sup>. One study reported a five-year tuberculosis (TB) cumulative crude incidence rate (CIR) of 81.4/100000 in Travellers compared to 45.5/100000 and 27.3/100000 in the general population and white Irish-born population, respectively<sup>25</sup>. Rates of TB were therefore three-fold higher in Travellers than the white Irish-born population<sup>25</sup>. Nolan et al (2017) reported that 41% of Travellers were smokers and 86% of these smokers reported respiratory symptoms including cough, wheeze and shortness of breath while 23% had an obstructive respiratory disease pattern<sup>26</sup>. Respiratory conditions (bronchitis and asthma) were rated as the second most common physical health condition, with a prevalence of 24.5% among Travellers in the ROI and 35.1%

1  
2  
3 in Northern Ireland<sup>9</sup>. This is considerably higher than available comparison ROI background  
4 population of 3% with chronic bronchitis<sup>31</sup>.  
5  
6

7  
8 Abdalla et al (2020) evaluated injuries<sup>27</sup> (Table 3). They demonstrated that the prevalence of  
9 unintentional non-fatal injury in Travellers < 65 years was lower (SIR=40), while the  
10 prevalence of intentional injury was higher (SIR=213) than the general population. Travellers  
11 > 65 years had higher injury rates for both unintentional (SIR=137) and intentional injuries  
12 (SIR=517). Common physical health problems reported by a population of 281 Travellers in  
13 prison in the U.K. were asthma (n=12), 'back' problems (n=10), epilepsy (n=9) and arthritis  
14 (n=7)<sup>16</sup>.  
15  
16  
17  
18  
19  
20

21  
22 Two studies (Table 4) examined genetic disorders both inherited in an autosomal recessive  
23 manner. One was a case report of a 32 year-old female who inherited a rare  
24 leukoencephalopathy and severe central nervous system (CNS) impairment was reported<sup>28</sup>.  
25 Flynn et al (1989) also reported CNS dysfunction in Travellers due to the presence of Type II  
26 hyperprolinemia<sup>29</sup>.  
27  
28  
29  
30

31  
32 One study examined effects of lifestyle changes on the microbiome and its associated risks  
33 for chronic disease<sup>18</sup>. Results demonstrated that Travellers retained a microbiota similar to  
34 that of non-industrialised populations due to halting site dwelling, number of siblings and  
35 animal ownership. Another study evaluating the prevalence of inflammatory bowel disease  
36 found no records of idiopathic bowel disease in the Traveller population.  
37  
38  
39  
40

41  
42 Most Travellers described their health as very good (59%) or good (28%)<sup>9</sup>. Comparable  
43 figures among the general population are similar at 62% and 29%, respectively<sup>31</sup>. Twelve  
44 percent of Travellers described their health as fair, bad or very bad<sup>9</sup>. The corresponding  
45 figure for non-Travellers was 9%<sup>31</sup>. Breaking this down for 34-54 year age group, 31% of  
46 Travellers<sup>9</sup> categorised their health as 'very good' compared to 57% among non-Travellers<sup>31</sup>.  
47 In this age group, 29% of Travellers<sup>9</sup> had health categorised as 'fair', 'bad' or 'very bad' while  
48 the comparable figure in non-Travellers was 8%<sup>31</sup>.  
49  
50  
51  
52  
53  
54

55  
56 Three studies conducted qualitative or mixed methods research. In the Mac Gabhann (2011)  
57 which explored experiences of Travellers in prison in the UK<sup>16</sup>, prison staff completed 296  
58 surveys, while 57 Travellers (of Irish origin), predominantly male (93.6%) participated in  
59  
60



1  
2  
3 focus groups and semi-structured interviews. Almost a quarter (24.6%) of prisoners  
4 reported physical health problems and Travellers reflected negatively on the use of  
5 healthcare prison facilities to manage their health condition.  
6  
7

8  
9  
10 *'I'll never go back to them, they've done nothing for me'.*  
11

12 Murphy (2016)<sup>32</sup> explored the experiences of homelessness for Travellers through  
13 qualitative interviews of 14 Travellers in one county in the Republic of Ireland. They vividly  
14 described the negative impact of homelessness had on their physical health.  
15  
16

17  
18  
19 *'I never had blood pressure in my life. Now, the last year and a half, ever since the*  
20 *time we had to leave (the rented house), I'm taking blood pressure tablets.'*  
21  
22

23 Collateral relevant to family members was also reported.  
24

25  
26 *'My mother is on a breathing machine because she has a sleeping disorder so in the,*  
27 *in the night time if she would knock it off, she goes into her, what's it a coma. And*  
28 *with the sleeping disorder it cut's your oxygen from your throat to your brain, so that*  
29 *leads to a heart attack or a stroke'.*  
30  
31  
32  
33

34  
35 Murphy described health problems that participants directly attributed to their homeless  
36 state or living conditions (on a site with no toilet) such as chronic kidney infections. Limited  
37 access to electricity was a problem identified as well as a lack of refrigeration to store  
38  
39  
40  
41  
42  
43  
44  
45  
46  
47  
48  
49  
50  
51  
52  
53  
54  
55  
56  
57  
58  
59  
60

59  
60  
Hodgins et al (2006)<sup>19</sup> explored, through focus groups, perceptions of illness causation and  
health inequalities in 41 Traveller women in two regions in Ireland. Themes of poor living  
conditions, discrimination, stress, anxiety, depression and violence described their  
perceptions of the cause of their poor health. Traveller women attributed other health  
conditions such as heart disease to the stresses of their life and considered risk factors such  
as smoking as less important factors and often beneficial to health status.

*'People have a lot of worry, a lot of stresses and can develop heart disease and heart*  
*attacks...'*

The interaction of poor accommodation and health was also noted.

1  
2  
3                   *“An awful lot of it comes from bad accommodation and discrimination. I keep sayin’*  
4                   *those two words an’ I know well it’s those that are causing’ the most problems.*  
5                   *causin’ heart problems and depression”*  
6  
7  
8  
9  
10

## 11                   **Discussion**

12                   This scoping review appears to be the first-time that data relating to physical health  
13                   conditions of Travellers has been synthesised. Pooling the evidence together underlines two  
14                   key findings. Firstly, the disproportionately high burden of physical health conditions such as  
15                   the metabolic syndrome, asthma, bronchitis, TB and intentional injuries which were 2-3  
16                   times higher in Travellers compared to the background Irish population. Secondly, the  
17                   unique health considerations such as rare genetic diseases experienced by a proportion of  
18                   Travellers and the possibility of health benefits associated with their distinct gut microbiome  
19                   linked to the traditional Traveller way of life.  
20  
21  
22  
23  
24  
25  
26  
27

28                   Over 7,000 Travellers were included in this review with the largest source of data from the  
29                   AITHS (n=4,141)<sup>9</sup>. One study took place in England and Wales, while the rest of studies were  
30                   based in Ireland. Living conditions were not specified in the majority of studies. This is  
31                   important to note as living conditions are a key driver of health<sup>33</sup> which is rated higher by  
32                   Travellers when living conditions are better<sup>18 24</sup>.  
33  
34  
35  
36  
37

38                   There was a higher representation of females (61%) within this review. This may be  
39                   explained by findings from the AITHS highlighting that female Travellers were more likely to  
40                   engage in research studies<sup>9</sup>. The majority of participants were in their second to fourth  
41                   decades, which concurs with CSO (2016) data<sup>5</sup> demonstrating that Travellers are a young  
42                   population. The paucity of older participants means that the effects of ageing and extent of  
43                   geriatric syndromes in this population are not fully known.  
44  
45  
46  
47  
48  
49

50                   This review showed high rates of the metabolic syndrome, CVD risk factors and established  
51                   CVD disease compared to the background population, yet lower self-reported CVD of  
52                   approximately 5.6%<sup>23</sup>, which was less than self-reported CVD rate of 16.1% for the general  
53                   population<sup>31</sup>. This likely underestimation of CVD among Travellers may be due to a  
54                   reluctance to divulge information and/or a lack of disease awareness, fewer attendances for  
55                   preventive services as well as late presentation and higher case-fatality rates of CVD<sup>9</sup>.  
56  
57  
58  
59  
60

1  
2  
3 Evidently, improved targeted primary and secondary care strategies for Travellers are  
4 required.  
5

6  
7 Respiratory conditions (bronchitis and asthma) were rated as the second most common  
8 physical health condition, with a prevalence of 24.5% among Travellers in the ROI and 35.1%  
9 in Northern Ireland<sup>9</sup> which is markedly higher than the comparison ROI background  
10 population of 3% with chronic bronchitis<sup>31</sup>. This concurs with Nolan's findings where 28.5%  
11 of Travellers had a GP diagnosis of asthma and 23% had abnormal spirometry results<sup>26</sup>.  
12 Rates of TB were three-fold higher in Travellers than the white Irish-born population<sup>25</sup>.  
13 Proposed risk factors were cited as higher house occupancy, smoking and the presence of  
14 diabetes or pre-diabetes.  
15

16  
17 Travellers suffer a greater burden of injuries and a higher risk of dying from injuries than the  
18 general population<sup>27</sup>. Notably, a higher rate of intentional injuries was reported, and a lower  
19 rate of unintentional injuries compared to the general population. The high rate of  
20 intentional injuries likely links to mental health crises among Travellers with a suicide rate  
21 six times the general population<sup>9</sup>. The true intentional-injury rates may be in fact higher as  
22 Travellers may not present themselves to care settings for minor injuries, and may be more  
23 inclined to self-treat or present late for care<sup>9</sup>. Conversely, there may actually be a lower  
24 unintentional-injury rate due to lower participation in sport and recreational activities in  
25 young Travellers. Travellers over 65 years, however, were twice as likely to be injured,  
26 highlighting their vulnerability. The AITHS (2010) cited the home as the most likely location  
27 for an injury, which may be due to poor living environments<sup>9</sup>. This is in accordance with a  
28 recent report, which highlighted grossly inadequate living conditions among Travellers<sup>34</sup>.  
29

30  
31 This review highlighted genetic conditions such as Type II hyperprolinaemia<sup>29</sup> and  
32 leukoencephalopathy<sup>28</sup>. These represent an important factor affecting physical health in  
33 Travellers as autosomal recessive conditions are commonly reported<sup>35</sup>. Of note, some  
34 studies (n=5) examining inherited disorders such as congenital atrichia, a rare autosomal  
35 recessive disorder were excluded from this review as they did not meet the age eligibility  
36 criteria. Given that genetic conditions are prevalent in Travellers, consideration of 'grown  
37 up' genetic conditions should be an area of emerging focus.  
38  
39  
40  
41  
42  
43  
44  
45  
46  
47  
48  
49  
50  
51  
52  
53  
54  
55  
56  
57  
58  
59  
60

1  
2  
3 Positive physical health factors linked to the gut, were discussed in two studies<sup>18 30</sup>.

4 McCormick et al (2001) noted the absence of consultant-diagnosed inflammatory bowel  
5 disease possibly due to exposure to enteric bacteria and infection in early life<sup>30</sup>. Keohane et  
6 al (2020) suggested the 'non-industrialised microbiome' of Travellers may be due to living  
7 conditions and animal ownership<sup>18</sup>. How the gut microbiome changes with modernisation  
8 should be evaluated in future studies.  
9  
10  
11  
12  
13

14  
15 When comparing Travellers to non-Travellers (35–54 age group), Travellers are  
16 approximately three times as likely to have poor health or some type of difficulty or  
17 disability with the health gap rapidly increasing with age, which mirrors the pattern in other  
18 ethnic minority groups.<sup>36</sup> A UK based study found that compared to white British people and  
19 17 different ethnic minority groups, Gypsy and Irish Travellers (with the exception of  
20 younger and older age groups) had markedly high levels of multiple long-term conditions<sup>37</sup>.  
21 Another study found inequalities in health-related quality of life were widest for Gypsy or  
22 Irish Travellers, Pakistani and Bangladeshi women<sup>38</sup>.  
23  
24  
25  
26  
27  
28  
29

30 In a similar way to Travellers experiencing a high burden of physical health conditions  
31 compared to the background population, poorer health is experienced by the Roma  
32 population compared to non-Roma across Europe<sup>39</sup>. For instance, a high prevalence of  
33 tuberculosis has been detected in the Roma population<sup>40</sup>. Other diseases have been  
34 described in Roma, such as hepatitis A<sup>41</sup> and hepatitis C virus (HCV) and HIV<sup>42</sup>. An outbreak  
35 of Hepatitis A in Travellers was described in the literature<sup>43</sup> but was not included in the  
36 current review due to the high proportion of participants under 18 years. A high prevalence  
37 of measles was documented in Roma<sup>44</sup>, a number of papers also described measles  
38 outbreaks in Irish Travellers<sup>45</sup> but similarly were also excluded from the present review due  
39 to the proportion of children in these papers.  
40  
41  
42  
43  
44  
45  
46  
47  
48

49 A strength of this review is the synthesis of data relating to physical health conditions of  
50 Travellers based in England and Wales, ROI and Northern Ireland. A further strength was the  
51 active stakeholder involvement by the inclusion of a member of the Travelling community as  
52 an integral and valued member of the review team. This ensured the real-world relevance of  
53 this research and is likely to increase chances of implementation of research findings into  
54 real life settings<sup>46</sup>.  
55  
56  
57  
58  
59  
60

1  
2  
3 There were a number of limitations. As is the general convention in scoping reviews a  
4 formal quality assessment of included studies<sup>11 12</sup> was not conducted therefore, the  
5 robustness of evidence<sup>12</sup> could not be judged. We acknowledge that definitive  
6  
7 recommendations are not possible and the review must be interpreted in light of this<sup>11 12</sup>.  
8  
9 We therefore see this work as a useful accessible summary of the evidence base regarding  
10 physical health conditions in Travellers<sup>11 47</sup>. As previously stated, the initial intention was to  
11 perform a review encompassing physical and mental health conditions, however, a  
12 pragmatic decision was taken to include physical health conditions only which we  
13 acknowledge is somewhat unidimensional as physical and mental health conditions are  
14 inter-related and multi-morbidity can straddle both.  
15  
16

17  
18 The AITHS which is over 10 years old remains the most comprehensive report of Traveller  
19 health and is quoted widely in subsequent reports. It highlighted four priority areas for  
20 intervention: mother and child services; men's health; cause-specific issues for respiratory  
21 and cardio-vascular disease; and a new model of primary care delivery. The importance of  
22 using a 'social determinants' approach linking inequalities in healthcare, accommodation,  
23 and other factors such as racism and discrimination to poor health was also advocated<sup>9</sup>.  
24 With a stark 39% of Travellers estimated to be homeless, this negatively affects overall  
25 health and well-being and compounds health inequalities<sup>48</sup>. The long awaited recently  
26 published National Traveller Health Action Plan (2022)<sup>49</sup>, relevant to the Republic of Ireland,  
27 contained 45 key actions around resourcing, identifying, reinstating, and expanding Primary  
28 Health Care for Traveller Projects and engaging with public health. It also echoed a social  
29 determinants approach with targeted and mainstream strategies to overcome inequalities.  
30 This was also advocated in the National Traveller and Roma Inclusion Strategy 2017-2021  
31 (NTRIS)<sup>50</sup>. Another important approach of the National Traveller Health Action Plan is a  
32 'whole-of-government approach' with integrated cross sectoral working. All of these  
33 approaches if implemented should impact the burden of physical health conditions in  
34 Travellers but there is a sense of policy conflict<sup>51</sup>, policy fatigue and policy failure in the  
35 absence of tangible action on recommendations.  
36  
37

38  
39 More is known about physical health conditions in Irish-based Travellers and policies  
40 described are relevant to this setting. Less is known specifically about the physical health  
41 conditions of UK based Irish Travellers. Some research collectively pooled data from gypsies  
42  
43  
44  
45  
46  
47  
48  
49  
50  
51  
52  
53  
54  
55  
56  
57  
58  
59  
60

1  
2  
3 and Irish Travellers as well as other Traveller groups. Although all these groups experience  
4 discrimination, poor living conditions and health inequalities, how these groups vary in  
5 relation to physical health conditions is not well known.  
6  
7

8  
9 Ethnic identifiers would enable physical health conditions to be more accurately tracked but  
10 this would need to be conducted sensitively. This is line with a key recommendation of the  
11 National Traveller Health Action Plan (2022-2027)<sup>49</sup>, which recommends systematic ethnic  
12 equality monitoring, including the introduction of ethnic identifiers on health data sets. Due  
13 to the inter-relationship between living conditions and health, living conditions need to be  
14 radically improved and studies including Travellers should include data on living  
15 arrangements.  
16  
17

18  
19 It should also be considered that the extent of physical health conditions may be  
20 underestimated due to Travellers not presenting or presenting late for care as well as a  
21 mistrust of healthcare professionals<sup>9</sup>. The co-development of trust-building mechanisms  
22 and improved cooperation between Travellers and healthcare professionals has been  
23 recognized as important strategies to improve Travellers' access and engagement with  
24 mainstream health services<sup>52</sup>. Non-communicable diseases such as cancer and arthritis in  
25 Travellers featured minimally within this review. The health of older Travellers was not  
26 specifically explored, which may be partly due to the mortality gap. Further work is needed  
27 on how best to build confidence and empower Travellers to self-manage their health  
28 without 'talking at them'. Functional literacy and health literacy levels need to be optimised  
29 while also reducing the stigma associated with accessing healthcare<sup>9</sup>. Supporting Traveller  
30 groups to co-design culturally appropriate health literacy resources has been identified as  
31 crucial to improve understanding of pathways to access services and signs and symptoms of  
32 different health conditions<sup>52</sup>. Health care staff can be discriminatory in their attitudes<sup>53</sup>  
33 which also needs attention. At a broader level, healthcare service design needs to be  
34 culturally appropriate. A recent study exploring Travellers' views about how existing  
35 healthcare provision could be more responsive to their needs found that employing  
36 members of the community within the health service, embedding an ethos of cultural safety  
37 and humility and delivering Traveller Cultural Awareness Training to healthcare staff would  
38 improve the cultural appropriateness of mainstream health services<sup>52</sup>.  
39  
40  
41  
42  
43  
44  
45  
46  
47  
48  
49  
50  
51  
52  
53  
54  
55  
56  
57  
58  
59  
60

1  
2  
3 Ultimately, ethnic inequalities in health, relevant to Travellers and other ethnic minority  
4 groups are closely linked to racism and discrimination as well as the social determinants of  
5 health such as housing, education, employment and income which are strongly associated  
6 with poor health<sup>54</sup>. These underlying factors therefore need to be tackled to impact health.  
7  
8  
9

## 10 11 **Conclusion**

12  
13 This scoping review highlights marked inequalities in the burden of physical health  
14 conditions experienced by Mincéirí. Many common physical health conditions were 2-3  
15 times more prevalent in Travellers compared to the background population. Multifaceted  
16 and tangible action is required including better targeted approaches and accommodations  
17 within mainstream healthcare, underpinned by a social determinants approach, to bridge  
18 the gap in physical health conditions experienced by this marginalised group.  
19  
20  
21  
22  
23  
24  
25  
26  
27

## 28 **Acknowledgements**

29  
30 We would like to thank Dr. John Gilmore, University College Dublin who provided useful  
31 comments on this work. We would also like to thank excellent 2<sup>nd</sup> year medical students of  
32 the School of Medicine, Trinity College Dublin, who performed a test review in 2021, which  
33 preceded this work (Sinead Cummins, Cliona Sheehy, Eva Perdue, Laura Mc Kenna).  
34  
35  
36  
37

38 **Funding statement:** This research received no specific grant from any funding agency in the  
39 public, commercial or not-for-profit sector.  
40  
41

42 **Competing Interest:** There is no competing interest to consider.  
43  
44  
45  
46  
47

## 48 **Author's contribution**

49  
50 FK; independent data screening, data extraction, data synthesis, drafting of manuscript, AW;  
51 contribution to the development of the design, drafting of manuscript, JV; drafting of  
52 manuscript, DM; generation and refinement of search strategy, JB; conception of original  
53 idea and deigning the study, refinement of search strategy, independent data screening,  
54 data extraction, data synthesis, drafting of manuscript. All authors provided important  
55  
56  
57  
58  
59  
60

1  
2  
3 intellectual contribution and guidance throughout the development of the manuscript. All  
4 authors contributed, edited and approved the final version of this manuscript.  
5  
6

7 **Provenance and peer review:** Not commissioned; externally peer reviewed.  
8  
9

10 **Data sharing statement:** All relevant data are within the paper and supporting material.  
11  
12

13 **Patient consent for publication:** Not required.  
14

15 **Ethics Approval:** This is a review - so does not contain primary data so ethical approval is  
16 not required.  
17

18  
19 Figure Legend

20  
21 Figure 1 PRISMA flow diagram  
22  
23

## 24 25 26 27 28 29 30 31 32 33 34 35 36 37 38 39 40 41 42 43 44 45 46 47 48 49 50 51 52 53 54 55 56 57 58 59 60

### References

1. Ni Shuinear S. In Irish Travellers: Culture and Ethnicity Belfast. Belfast: Institute of Irish Studies 1996:134-154.
2. Binchy A. A Heritage Ahead. Cultural Action and Travellers. . A Heritage Ahead. Dublin: Pavee Point Publications 1995:87-93.
3. Gilbert E, Carmi S, Ennis S, et al. Genomic insights into the population structure and history of the Irish Travellers. *Sci Rep* 2017;7:42187. doi: 10.1038/srep42187 [published Online First: 2017/02/10]
4. Cromarty H. Gypsies and Travellers Briefing Paper, House of Commons, Number 08083 2019 [
5. Census 2016 Profile 8 - Irish Travellers, Ethnicity and Religion 2016 [Available from: <https://www.cso.ie/en/csolatestnews/presspages/2017/census2016profile8-irishtravellersethnicityandreligion/>].
6. Statement by An Taoiseach Enda Kenny TD on the recognition of Travellers as an ethnic group, Dáil Éireann, Department of an Taoiseach 2018 [Available from: <https://www.gov.ie/en/speech/d29014-statement-by-an-taoiseach-enda-kenny-td-on-the-recognition-of-travel/#>].
7. McGinnity FG, F. Kenny O, Russell H. . Who experiences discrimination in Ireland? Evidence from the QNHS Equality Modules, Irish Human Rights and Equality Commission, Economic and Social Research Institute. Dublin 2017.
8. McGorrian C, Hamid NA, Fitzpatrick P, et al. Frequent mental distress (FMD) in Irish Travellers: discrimination and bereavement negatively influence mental health in the All Ireland Traveller Health Study. *Transcult Psychiatry* 2013;50(4):559-78. doi: 10.1177/1363461513503016 [published Online First: 2013/09/17]
9. All Ireland Traveller Health Study: Our Geels, Summary of Findings. All Ireland Traveller Health Study Team, Dublin: University College Dublin, 2010.
10. O'Reilly P, Jenkinson A, Martin T, et al. G294(P) Health and disease in children of the 'irish traveller' community. *Archives of Disease in Childhood* 2018;103(Suppl 1):A120-A20. doi: 10.1136/archdischild-2018-rcpch.286



11. Peters MDG, C. McInerney, P. et al. . Joanna Briggs Institute (JBI) Manual for Evidence Synthesi2020.
12. Arksey H, O'Malley L. Scoping studies: towards a methodological framework. *International Journal of Social Research Methodology* 2005;8(1):19-32. doi: 10.1080/1364557032000119616
13. Levac D, Colquhoun H, O'Brien KK. Scoping studies: advancing the methodology. *Implementation Science* 2010;5(1):69. doi: 10.1186/1748-5908-5-69
14. Tricco AC, Lillie E, Zarin W, et al. PRISMA Extension for Scoping Reviews (PRISMA-ScR): Checklist and Explanation. *Ann Intern Med* 2018;169(7):467-73. doi: 10.7326/m18-0850 [published Online First: 2018/09/05]
15. Daudt HML, van Mossel C, Scott SJ. Enhancing the scoping study methodology: a large, inter-professional team's experience with Arksey and O'Malley's framework. *BMC Medical Research Methodology* 2013;13(1):48. doi: 10.1186/1471-2288-13-48
16. Mac Gabhann C. Voices unheard. *A Study of Irish Travellers in Prison London: Irish Chaplaincy in Britain* 2011
17. Tan S, Avalos G, Dineen B, et al. Traveller health: Prevalence of diabetes, pre diabetes and the metabolic syndrome. *Irish Medical Journal* 2009;102(6)
18. Keohane DM, Ghosh TS, Jeffery IB, et al. Microbiome and health implications for ethnic minorities after enforced lifestyle changes. *Nature Medicine* 2020;26(7):1089-95.
19. Hodgins M, Millar M, Barry MM. "...it's all the same no matter how much fruit or vegetables or fresh air we get": Traveller women's perceptions of illness causation and health inequalities. *Social Science and Medicine* 2006;62(8):1978-90. doi: 10.1016/j.socscimed.2005.08.052
20. Slattery D, Brennan M, Canny C, et al. The prevalence of diabetes, pre-diabetes and metabolic syndrome in Irish travellers and the impact of lifestyle modification. *Irish Journal of Medical Science* 2011;180:S489. doi: 10.1007/s11845-011-0761-x
21. Slattery D, Brennan M, Canny C, et al. The point prevalence of diabetes, pre diabetes and metabolic syndrome in Irish travellers. *Irish Journal of Medical Science* 2010;179(13):S522. doi: 10.1007/s11845-010-0623-y
22. McGorrian C, Daly L, Fitzpatrick P, et al. Cardiovascular disease and risk factors in an indigenous minority population. The All-Ireland Traveller Health Study. *European Journal of Preventive Cardiology* 2012;19(6):1444-53. doi: 10.1177/1741826711428059
23. McGorrian CM, Abdalla S, Daly L, et al. Adverse cardiovascular risk profile in a disadvantaged minority community consistent with the thrifty phenotype hypothesis. Findings from the All-Ireland Traveller Health Study. *European Heart Journal* 2010;31:238-39.
24. Kelleher CC, Whelan J, Daly L, et al. Socio-demographic, environmental, lifestyle and psychosocial factors predict self rated health in Irish Travellers, a minority nomadic population. *Health and Place* 2012;18(2):330-38. doi: 10.1016/j.healthplace.2011.10.009
25. O'Toole RF, Jackson S, Hanway A, et al. Tuberculosis incidence in the Irish Traveller population in Ireland from 2002 to 2013. *Epidemiology and Infection* 2015;143(13):2849-55. doi: 10.1017/S0950268815000138
26. Nolan G, Wending B, Smyth E, et al. Respiratory health in an Irish traveller community. *Irish Journal of Medical Science* 2017;186:S432-S33. doi: 10.1007/s11845-017-1678-9
27. Abdalla S, Kelleher CC, Quirke B, et al. Disparities in fatal and non-fatal injuries between Irish travellers and the Irish general population are similar to those of other indigenous minorities: A cross-sectional population-based comparative study. *BMJ Open* 2013;3(1) doi: 10.1136/bmjopen-2012-002296
28. Cullinane PW, Lynch SA, Marnane M. Phenotypic Variability in Leukoencephalopathy with Brain Calcifications and Cysts: Case Report of Siblings from an Irish Traveller Family with a Homozygous SNORD118 Mutation. *Journal of Molecular Neuroscience* 2020;70(9):1354-56. doi: 10.1007/s12031-020-01550-7

- 1
  - 2
  - 3
  - 4
  - 5
  - 6
  - 7
  - 8
  - 9
  - 10
  - 11
  - 12
  - 13
  - 14
  - 15
  - 16
  - 17
  - 18
  - 19
  - 20
  - 21
  - 22
  - 23
  - 24
  - 25
  - 26
  - 27
  - 28
  - 29
  - 30
  - 31
  - 32
  - 33
  - 34
  - 35
  - 36
  - 37
  - 38
  - 39
  - 40
  - 41
  - 42
  - 43
  - 44
  - 45
  - 46
  - 47
  - 48
  - 49
  - 50
  - 51
  - 52
  - 53
  - 54
  - 55
  - 56
  - 57
  - 58
  - 59
  - 60
29. Flynn MP, Martin m C, Moore PT, et al. Type II hyperprolinaemia in a pedigree of Irish travellers (nomads). *Archives of Disease in Childhood* 1989;64(12):1699-707. doi: 10.1136/adc.64.12.1699
30. McCormick PA, Manning D. Chronic inflammatory bowel disease and the 'over-clean' environment: Rarity in the Irish 'Traveller' community. *Irish Medical Journal* 2001;94(7):203-04.
31. Morgan K. SLAN 2007: survey of lifestyle, attitudes and nutrition in Ireland: main report. 2007
32. Movement OT. Travelling Through Homelessness: A Study of Traveller Homelessness in County Offaly.
33. Abdalla S, Kelleher C, Quirke B, et al. Social inequalities in health expectancy and the contribution of mortality and morbidity: the case of Irish Travellers. *Journal of Public Health* 2013;35(4):533-40. doi: 10.1093/pubmed/fds106
34. Russell H, Provalko, I., Mc Ginnity F., Enright S. . Monitoring adequate housing in Ireland. The Economic and Social Research Institute, 2021.
35. Lynch SA, Crushell E, Byrne N, et al. Cataloguing inherited disorders amongst the Irish traveller population. *Ulster Medical Journal* 2018;87(1):54-55.
36. Watson D, Kenny, O., Mc Ginnity, F. . A Social Portrait of Travellers in Ireland, Research Series Number 56, 2017.
37. Brenda H, Mai S, Catherine LS, et al. Ethnic inequalities in age-related patterns of multiple long-term conditions in England: analysis of primary care and nationally representative survey data. *medRxiv* 2022:2022.08.05.22278462. doi: 10.1101/2022.08.05.22278462
38. Watkinson RE, Sutton M, Turner AJ. Ethnic inequalities in health-related quality of life among older adults in England: secondary analysis of a national cross-sectional survey. *Lancet Public Health* 2021;6(3):e145-e54. doi: 10.1016/s2468-2667(20)30287-5 [published Online First: 2021/02/01]
39. Roma health report, health status of the Roma population. Data collection in the Member States of the European Union. , 2014
40. Casals M, Pila P, Langohr K, et al. Incidence of infectious diseases and survival among the Roma population: a longitudinal cohort study. *Eur J Public Health* 2012;22(2):262-6. doi: 10.1093/eurpub/ckq204 [published Online First: 2011/01/11]
41. Arce Arnáez A, Cabello Ballesteros L, Iñigo Martínez J. [Community outbreak of hepatitis A in a marginal population. Vaccination for its control and acceptance of the measure]. *Aten Primaria* 2007;39(3):139-43. doi: 10.1157/13099561 [published Online First: 2007/03/28]
42. Teira R, Lizarralde E, Muñoz P, et al. [A cross-sectional study on the epidemiological and clinical characteristics of HIV-1 infection in gypsies and in other minorities in Bilbao, Northern Spain]. *Med Clin (Barc)* 2002;119(17):653-6. doi: 10.1016/s0025-7753(02)73530-6 [published Online First: 2002/11/28]
43. Kelly D, O'Hare C, McKeown P, et al. Detection and control of an ongoing international outbreak of hepatitis A among the Irish Traveller community beginning September 2020. *Epidemiol Infect* 2022;150:1-13. doi: 10.1017/s0950268822000309 [published Online First: 2022/02/17]
44. Rodrigo SG, Calatrava RG, Vicenta Rigo Medrano M, et al. [Reemergence of measles. Epidemic situation in the Valencian Community during the years 2011 and 2012]. *Enferm Infecc Microbiol Clin* 2014;32 Suppl 1:43-50. doi: 10.1016/s0213-005x(14)70149-1 [published Online First: 2014/03/19]
45. Cohuet S, Bukasa A, Heathcock R, et al. A measles outbreak in the Irish traveller ethnic group after attending a funeral in England, March-June 2007. *Epidemiology and Infection* 2009;137(12):1759-65. doi: 10.1017/S0950268809002714
46. Concannon TW, Meissner P, Grunbaum JA, et al. A new taxonomy for stakeholder engagement in patient-centered outcomes research. *J Gen Intern Med* 2012;27(8):985-91. doi: 10.1007/s11606-012-2037-1 [published Online First: 2012/04/25]

- 1  
2  
3 47. Davis K, Drey N, Gould D. What are scoping studies? A review of the nursing literature. *Int J Nurs*  
4 *Stud* 2009;46(10):1386-400. doi: 10.1016/j.ijnurstu.2009.02.010 [published Online First:  
5 2009/03/31]  
6  
7 48. The Traveller Community and Homelessness Advocacy paper: October 2021. Pavee Point  
8 Traveller & Roma Centre.  
9 49. National Traveller Health Action Plan (2022-2027). Working together to improve the health  
10 experiences and outcomes for Travellers. Department of Health, Ireland. , 2022.  
11 50. National Traveller and Roma Inclusion Strategy (NTRIS). 2017-2021. Department of Justice and  
12 Equality, Ireland. , 2017.  
13 51. Implementation of Traveller Policy: Terrain for Imagination and Challenge. May 2022. Pavee  
14 Point Traveller & Roma Centre. .  
15 52. Villani J, Kuosmanen, T., McDonagh, M, Barry, M.M. . Traveller Mental Wellness Continuum  
16 Framework: A qualitative peer research study of Travellers' views. Health Promotion  
17 Research Centre, University of Galway., 2023.  
18 53. Gray C, Donnelly J. Unheard voices: the views of traveller and non-traveller mothers and children  
19 with ASD. *International Journal of Early Years Education* 2013;21(4):268-85. doi:  
20 10.1080/09669760.2013.842160  
21  
22 54. Williams DR, Yan Y, Jackson JS, et al. Racial Differences in Physical and Mental Health: Socio-  
23 economic Status, Stress and Discrimination. *J Health Psychol* 1997;2(3):335-51. doi:  
24 10.1177/135910539700200305 [published Online First: 1997/07/01]  
25  
26  
27  
28  
29  
30  
31  
32  
33  
34  
35  
36  
37  
38  
39  
40  
41  
42  
43  
44  
45  
46  
47  
48  
49  
50  
51  
52  
53  
54  
55  
56  
57  
58  
59  
60

PRISMA 2020 flow diagram for new systematic reviews which included searches of databases and registers only

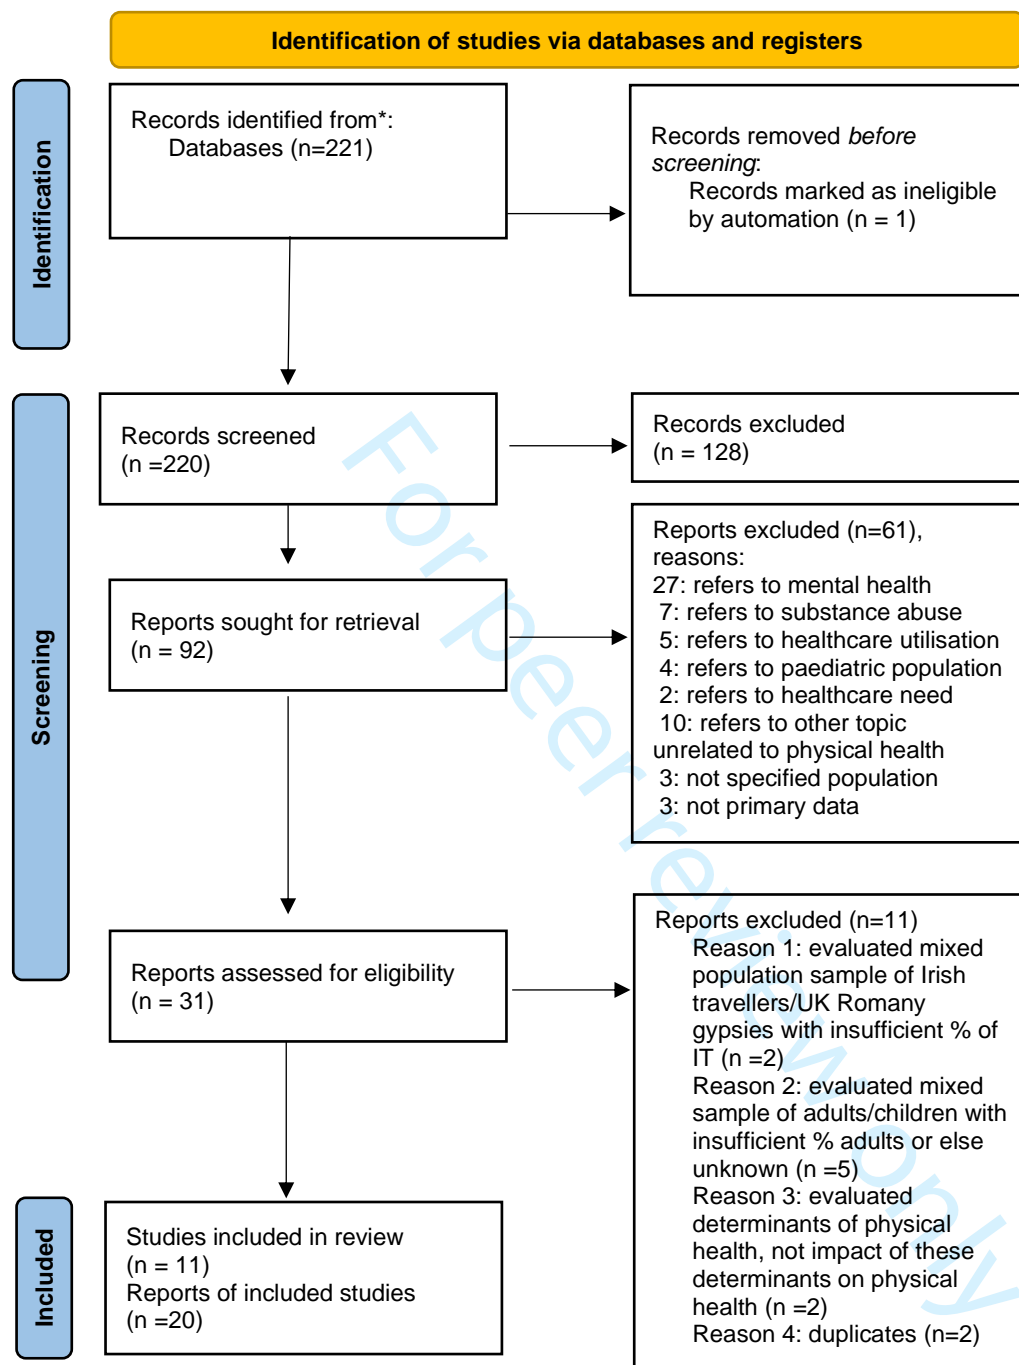

**Supplementary Box 1: Full search details****EMBASE**

'health'/exp OR 'health status'/exp OR 'mental health'/exp OR 'mental disease'/exp OR 'physical disease'/exp

((Mental\* OR psychological\*) NEAR/2 (condition OR factor\* OR health OR fit OR fitness OR help OR state\* OR status OR well-being OR 'well being' OR stress\* OR distress OR disease\*)):ti,ab

(depression OR depressed OR addiction\* OR anxiety OR anxious OR delirium OR psychosis OR schizophreni\* ):ti,ab

((physical\*) NEAR/3 (health\* OR fit OR fitness OR well-being OR wellbeing OR status OR ill OR illness)):ti,ab

((cardiac OR cardiovascular OR heart) NEAR/3 (health OR disorder\* or disease\*)):ti,ab

('health study' OR 'health studies'):ti,ab

#1 OR #2 OR #3 OR #4 OR #5 OR #6

((Irish OR Ireland OR Dublin OR limerick OR Waterford OR Galway OR Dublin OR cork) NEAR/3 (traveller\* OR gypsy OR gypsies)):ti,ab

#7 AND #8

**Medline (OVID)**

exp Health/ OR exp Health Status/ OR exp Mental Disorders/ OR exp Chronic Disease/ OR exp Health Behavior/

((Mental\* OR psychological\*) adj2 (condition OR factor\* OR health OR fit OR fitness OR help OR state\* OR status OR well-being OR well being OR stress\* OR distress OR disease\*)):ti,ab.

(depression OR depressed OR addiction\* OR anxiety OR anxious OR delirium OR psychosis OR schizophreni\* ).ti,ab.

((physical\*) adj3 (health\* OR fit OR fitness OR well-being OR wellbeing OR status OR ill OR illness)).ti,ab.

((cardiac OR cardiovascular OR heart) adj3 (health OR disorder\* or disease\*)):ti,ab.

(health study OR health studies).ti,ab.

or/1-6

((Irish OR Ireland OR Dublin OR limerick OR Waterford OR Galway OR Dublin OR cork) adj3

(traveller\* OR gypsy OR gypsies)).ti,ab.

7 AND 8

**Web of Science**

TS =((((Mental\* OR psychological\*) NEAR/2 (condition OR factor\* OR health OR fit OR fitness OR help OR state\* OR status OR well-being OR "well being" OR stress\* OR distress OR disease\*)) OR (depression OR depressed OR addiction\* OR anxiety OR anxious OR delirium OR psychosis OR schizophreni\*) OR ((physical\*) NEAR/3 (health\* OR fit OR fitness OR well-being OR wellbeing OR status OR ill OR illness)) OR ((cardiac OR cardiovascular OR heart) NEAR/3 (health OR disorder\* or disease\*)) OR ("health study" OR "health studies")) AND ((Irish OR Ireland OR Dublin OR limerick OR Waterford OR Galway OR Dublin OR cork) NEAR/3 (traveller\* OR gypsy OR gypsies)))

**GoogleScholar**

"Irish travellers|traveller" "mental health|fitness|status|distress" "physical fitness|health|status|illness"

**CINAHL**

(MH "Mental Health") OR (MH "Mental Health Services+") OR (MH "Health Status+") OR (MH "Physical Fitness+") OR (MH "Psychological Well-Being")

TI ((Mental\* OR psychological\*) N2 (condition OR factor\* OR health OR fit OR fitness OR help OR state\* OR status OR well-being OR "well being" OR stress\* OR distress OR disease\*)) OR AB

((Mental\* OR psychological\*) N2 (condition OR factor\* OR health OR fit OR fitness OR help OR state\* OR status OR well-being OR "well being" OR stress\* OR distress OR disease\*))  
 TI (depression OR depressed OR addiction\* OR anxiety OR anxious OR delirium OR psychosis OR schizophreni\*) OR AB (depression OR depressed OR addiction\* OR anxiety OR anxious OR delirium OR psychosis OR schizophreni\*)  
 TI ((physical\*) N2 (health\* OR fit OR fitness OR well-being OR wellbeing OR status OR ill OR illness)) OR AB ((physical\*) N2 (health\* OR fit OR fitness OR well-being OR wellbeing OR status OR ill OR illness))  
 TI ((cardiac OR cardiovascular OR heart) N3 (health OR disorder\* or disease\*)) OR AB ((cardiac OR cardiovascular OR heart) N3 (health OR disorder\* or disease\*))  
 TI ("health study" OR "health studies") OR AB ("health study" OR "health studies")  
 S1 OR S2 OR S3 OR S4 OR S5 OR S6  
 TI ((Irish OR Ireland OR Dublin OR limerick OR Waterford OR Galway OR Dublin OR cork) N3 (traveller\* OR gypsy OR gypsies)) OR AB ((Irish OR Ireland OR Dublin OR limerick OR Waterford OR Galway OR Dublin OR cork) N3 (traveller\* OR gypsy OR gypsies))  
 S7 AND S8

#### SCOPUS

TITLE-ABS-KEY (((Mental\* OR psychological\*) W/2 (condition OR factor\* OR health OR fit OR fitness OR help OR state\* OR status OR well-being OR "well being" OR stress\* OR distress OR disease\*)) OR (depression OR depressed OR addiction\* OR anxiety OR anxious OR delirium OR psychosis OR schizophreni\*)) OR ((physical\*) W/3 (health\* OR fit OR fitness OR well-being OR wellbeing OR status OR ill OR illness)) OR ((cardiac OR cardiovascular OR heart) W/3 (health OR disorder\* or disease\*)) OR ("health study" OR "health studies")) AND ((Irish OR Ireland OR Dublin OR limerick OR Waterford OR Galway OR Dublin OR cork) W/3 (traveller\* OR gypsy OR gypsies))

#### PsycINFO

DE "Mental Health" OR DE "Health" OR DE "Health Literacy" OR DE "Health Status" OR DE "Physical Health" OR DE "Health Attitudes" OR DE "Health Behavior" OR DE "Health Risk Behavior" OR DE "Mental Disorders" OR DE "Chronic Mental Illness"  
 TI ((Mental\* OR psychological\*) N2 (condition OR factor\* OR health OR fit OR fitness OR help OR state\* OR status OR well-being OR "well being" OR stress\* OR distress OR disease\*)) OR AB ((Mental\* OR psychological\*) N2 (condition OR factor\* OR health OR fit OR fitness OR help OR state\* OR status OR well-being OR "well being" OR stress\* OR distress OR disease\*))  
 TI (depression OR depressed OR addiction\* OR anxiety OR anxious OR delirium OR psychosis OR schizophreni\*) OR AB (depression OR depressed OR addiction\* OR anxiety OR anxious OR delirium OR psychosis OR schizophreni\*)  
 TI ((physical\*) N2 (health\* OR fit OR fitness OR well-being OR wellbeing OR status OR ill OR illness)) OR AB ((physical\*) N2 (health\* OR fit OR fitness OR well-being OR wellbeing OR status OR ill OR illness))  
 TI ((cardiac OR cardiovascular OR heart) N3 (health OR disorder\* or disease\*)) OR AB ((cardiac OR cardiovascular OR heart) N3 (health OR disorder\* or disease\*))  
 TI ("health study" OR "health studies") OR AB ("health study" OR "health studies")  
 S1 OR S2 OR S3 OR S4 OR S5 OR S6  
 TI ((Irish OR Ireland OR Dublin OR limerick OR Waterford OR Galway OR Dublin OR cork) N3 (traveller\* OR gypsy OR gypsies)) OR AB ((Irish OR Ireland OR Dublin OR limerick OR Waterford OR Galway OR Dublin OR cork) N3 (traveller\* OR gypsy OR gypsies))  
 S7 AND S8

1  
2  
3  
4  
5  
6  
7  
8  
9  
10  
11  
12  
13  
14  
15  
16  
17  
18  
19  
20  
21  
22  
23  
24  
25  
26  
27  
28  
29  
30  
31  
32  
33  
34  
35  
36  
37  
38  
39  
40  
41  
42  
43  
44  
45  
46

Supplementary Table 1: Study Characteristics

| No | Author(s) and Title                                   | Study Aims & Objectives                                                                                                                                                                                                                                                                                                                                                                                                                     | Research Design               | Living Arrangements                | Location of participants          | Inclusion/Exclusion Criteria      | Data Collection Method                                                                                            |
|----|-------------------------------------------------------|---------------------------------------------------------------------------------------------------------------------------------------------------------------------------------------------------------------------------------------------------------------------------------------------------------------------------------------------------------------------------------------------------------------------------------------------|-------------------------------|------------------------------------|-----------------------------------|-----------------------------------|-------------------------------------------------------------------------------------------------------------------|
| 1  | <b>The All Ireland Traveller Health Study (AITHS)</b> | <ul style="list-style-type: none"> <li>-To record the number of Travellers on the island of Ireland</li> <li>-To record fertility rate and deaths in one year</li> <li>-To follow a birth cohort for 1 year</li> <li>-To document health status and determine factors affecting the health status of Travellers and their access to health services</li> <li>-To document attitudes/perceptions of Travellers to health services</li> </ul> | Census and quantitative study | Documented in some studies/reports | Island of Ireland North and South | Travellers from island of Ireland | Survey-census section, health status section, health status for children, health services utilisation for adults. |

|     |                                                                                                                                                                                                                                                                                                                                                                                                 |                                                                                                                                            |                                                                                |                                                                                               |                             |                                                                                                                 |                                                                                                                                                                                                                                                                                                        |
|-----|-------------------------------------------------------------------------------------------------------------------------------------------------------------------------------------------------------------------------------------------------------------------------------------------------------------------------------------------------------------------------------------------------|--------------------------------------------------------------------------------------------------------------------------------------------|--------------------------------------------------------------------------------|-----------------------------------------------------------------------------------------------|-----------------------------|-----------------------------------------------------------------------------------------------------------------|--------------------------------------------------------------------------------------------------------------------------------------------------------------------------------------------------------------------------------------------------------------------------------------------------------|
| 1.a | <p>Abdalla et al, 2020.</p> <p><b>‘Disparities in fatal and non-fatal injuries between Irish travellers and the Irish general population are similar to those of other indigenous minorities: a cross-sectional population-based comparative study’</b></p>                                                                                                                                     | <p>To assess disparities in fatal and non-fatal injury between travellers and the general population in Ireland</p>                        | <p>Comparative study based on cross-sectional population-based data.</p>       | <p>Not stated</p>                                                                             | <p>ROI</p>                  | <p><u>Inclusion:</u></p> <p>-Irish Travellers who participated in the AITHS</p> <p>-Aged 15 years or older.</p> | <p><i>Traveller data:</i></p> <p>-from the AITHS</p> <p>-from the General Register Office</p> <p>-CSO</p> <p>-PHNs working with traveller families.</p> <p><i>General population data:</i> - from the CSO 2008 report 2006 census and the Survey of Lifestyle, Attitude and Nutrition (SLAN) 2002.</p> |
| 1.b | <p>(i) Kelleher et al, 2012</p> <p><b>Sociodemographic, environmental, lifestyle and psychosocial factors predict self-rated health in Irish Travellers, a minority nomadic population</b></p> <p>(ii) Whelan et al, 2010.</p> <p><b>Socio-demographic, health status, psycho-social and lifestyle predictors of self-rated health in the All-Ireland Traveller Health Study (abstract)</b></p> | <p>Aim: to assess the predictive ability of socio-demographic, environmental, lifestyle and psychosocial factors to self-rated health.</p> | <p>Census survey of Traveller families in Ireland, North and South (AITHS)</p> | <p>75% (n=1547) live in house/apartment</p> <p>25% (n=515) live in caravan/trailer/chalet</p> | <p>ROI/Northern Ireland</p> | <p><u>Inclusion:</u> Self-identified Travellers in the Republic and Northern Ireland</p>                        | <p>Health Status survey: subjective questions around lifestyle, culture, social experiences/supports, health behaviour and self-reported health status.</p>                                                                                                                                            |



1  
2  
3  
4  
5  
6  
7  
8  
9  
10  
11  
12  
13  
14  
15  
16  
17  
18  
19  
20  
21  
22  
23  
24  
25  
26  
27  
28  
29  
30  
31  
32  
33  
34  
35  
36  
37  
38  
39  
40  
41  
42  
43  
44  
45  
46

|            |                                                                                                                                                                                                                                                                                                                                                                                                                   |                                                                                                                                   |                     |            |                                                    |                                                                                                            |                                                                                                                                                    |
|------------|-------------------------------------------------------------------------------------------------------------------------------------------------------------------------------------------------------------------------------------------------------------------------------------------------------------------------------------------------------------------------------------------------------------------|-----------------------------------------------------------------------------------------------------------------------------------|---------------------|------------|----------------------------------------------------|------------------------------------------------------------------------------------------------------------|----------------------------------------------------------------------------------------------------------------------------------------------------|
|            |                                                                                                                                                                                                                                                                                                                                                                                                                   |                                                                                                                                   |                     |            |                                                    |                                                                                                            |                                                                                                                                                    |
| <b>1.c</b> | <p>(i)Mc Gorrian et al, 2010</p> <p><b>Adverse cardiovascular risk profile in a disadvantaged minority community consistent with the thrifty phenotype hypothesis. Findings from the All-Ireland Traveller Health Study (Abstract)</b></p> <p>(ii) Mc Gorrian et al, 2012</p> <p><b>Cardiovascular disease and risk factors in an indigenous minority population. The All-Ireland Traveller Health Study.</b></p> | Aim: To examine CVD epidemiology and CVD risk factors in Irish Travellers and associations with social disadvantage.              | Observational study | Not stated | A random sample (20%) of participants in the AITHS | Inclusion:<br>All self-identified Traveller families on the island of Ireland were invited to participate. | AITHS: health survey via an oral-visual data collection instrument                                                                                 |
| <u>2</u>   | <p><u>Cullinane et al, 2020.</u></p> <p><b><u>'Phenotypic Variability in Leukoencehalopathy with Brain Calcifications and Cysts: Case reports of siblings from an Irish Traveller Family with a Homozygous SNORD118 Mutation'</u></b></p>                                                                                                                                                                         | <u>To describe a case report of an Irish traveller with a leukoencephalopathy and an inherited mutation in the SNORD118 gene.</u> | Case report         | Not stated | Not stated                                         | Inclusion:<br><u>32 year old female Irish Traveller with leukoencephalopathy.</u>                          | <u>Clinical examination, family history, medical history including birth history, medications, histopathology investigations, genetic studies.</u> |

Formatted: Font: Bold

|   |                                                                                                                                                                                                                |                                                                                                                                                            |                                      |                                                                                                                                                          |                          |                                                                                                                                                                               |                                                                                                                                                                                                                                                                                                                       |
|---|----------------------------------------------------------------------------------------------------------------------------------------------------------------------------------------------------------------|------------------------------------------------------------------------------------------------------------------------------------------------------------|--------------------------------------|----------------------------------------------------------------------------------------------------------------------------------------------------------|--------------------------|-------------------------------------------------------------------------------------------------------------------------------------------------------------------------------|-----------------------------------------------------------------------------------------------------------------------------------------------------------------------------------------------------------------------------------------------------------------------------------------------------------------------|
| 3 | <p><u>Flynn et al, 1989</u></p> <p><u>Type II Hyperprolinaemia in a pedigree of Irish travellers (nomads)</u></p>                                                                                              | <p><u>Aim: not stated but to investigate Type II hyperprolinaemia in Irish Travellers</u></p>                                                              | <p><u>Descriptive study</u></p>      | <p><u>Not stated</u></p>                                                                                                                                 | <p><u>Not stated</u></p> | <p><u>Inclusion: not clearly stated but family of the 'proband' and close relatives</u></p>                                                                                   | <p><u>Testing of urine by two-dimensional paper chromatography, those showing prolinuria had blood samples taken in plain tubes and their serum or plasma proline concentrations were determined on a Locarte amino acid analyser.</u></p> <p><u>In many cases no urine was collected but a blood sample was.</u></p> |
| 4 | <p><u>Hodgins et al, 2006</u></p> <p><u>'... it's all the same no matter how much fruit or vegetables or fresh air we get', Traveller women's perceptions of illness causation and health inequalities</u></p> | <p><u>Aim: to explore health, ill-health and health inequalities in Traveller women</u></p>                                                                | <p><u>Qualitative study</u></p>      | <p><u>Not stated</u></p>                                                                                                                                 | <p><u>Not stated</u></p> | <p><u>Inclusion: not explicitly stated but appears to be Traveller women accessing pre-existing community projects or adult education initiatives</u></p>                     | <p><u>-response to a vignette in focus groups</u></p>                                                                                                                                                                                                                                                                 |
| 5 | <p><u>Keohane et al, 2020.</u></p> <p><u>Microbiome and health implications for ethnic minorities after enforced lifestyle changes.</u></p>                                                                    | <p><u>Aim: to investigate whether recent lifestyle changes are associated with differences in the microbiome and risk factors for chronic disease.</u></p> | <p><u>Cross-sectional study.</u></p> | <p><u>Within 30km radius of Cork city at one of five locations.</u></p> <p><u>Varied from permanent encampment, halting sites or social housing.</u></p> | <p><u>Cork</u></p>       | <p><u>Inclusion: None of the participants had taken antibiotics within 1 month and none were taking laxatives, corticosteroids, anti-inflammatories or anticoagulants</u></p> | <p><u>- Fecal microbiota of Irish Travellers were collected and compared with that of the settled background population in the same geographic locality and with that from individuals in other industrialised and non-industrialised countries.</u></p>                                                              |

Formatted: Font: Not Bold

Formatted: Line spacing: Multiple 1.08 li

1  
2  
3  
4  
5  
6  
7  
8  
9  
10  
11  
12  
13  
14  
15  
16  
17  
18  
19  
20  
21  
22  
23  
24  
25  
26  
27  
28  
29  
30  
31  
32  
33  
34  
35  
36  
37  
38  
39  
40  
41  
42  
43  
44  
45  
46

|     |                                                                                                                                                                             |                                                                                                                                                        |                                          |                                                                                                        |                                                                                                  |                                   |                                                                                                                                                                                                                                       |
|-----|-----------------------------------------------------------------------------------------------------------------------------------------------------------------------------|--------------------------------------------------------------------------------------------------------------------------------------------------------|------------------------------------------|--------------------------------------------------------------------------------------------------------|--------------------------------------------------------------------------------------------------|-----------------------------------|---------------------------------------------------------------------------------------------------------------------------------------------------------------------------------------------------------------------------------------|
|     |                                                                                                                                                                             |                                                                                                                                                        |                                          | <u>NB 87% of participants were nomadic in childhood but their living conditions had since changed.</u> |                                                                                                  |                                   | <u>-Dietary habits were assessed via questionnaire</u><br><u>-Body composition was assessed by DXA.</u><br><u>-Well-being was assessed by the WHO-5 Well-Being Index</u><br><u>-Personal, medical and family history was recorded</u> |
|     |                                                                                                                                                                             |                                                                                                                                                        |                                          |                                                                                                        |                                                                                                  |                                   |                                                                                                                                                                                                                                       |
| 2   | (i) Slattery et al, 2011<br><b>The point prevalence of diabetes, pre-diabetes and metabolic syndrome in Irish travellers</b><br><b>Abstracts</b>                            | Aim for all: to evaluate CVD risk factors and the point prevalence of diabetes, pre-diabetes and metabolic syndrome in the Irish Traveller population. | Observational pilot study- abstract only | N/S                                                                                                    | Travellers living along 'western seaboard' recruited from Galway and Western Traveller movements | Inclusion: Travellers (>18 years) | The following outcomes were evaluated: glucose levels, lipid profiles, oral glucose tolerance tests, blood pressure, weight, height and waist circumference.                                                                          |
| 2.a | (ii) Slattery et al, 2011<br><b>The prevalence of diabetes, pre-diabetes and metabolic syndrome in Irish Travellers and the impact of lifestyle modification (abstract)</b> |                                                                                                                                                        |                                          |                                                                                                        |                                                                                                  |                                   |                                                                                                                                                                                                                                       |
| 2.b | (iii) Slattery, Brennan, Canny, Sweeney, Ward, O' Shea and Dunne                                                                                                            |                                                                                                                                                        |                                          |                                                                                                        |                                                                                                  |                                   |                                                                                                                                                                                                                                       |

1  
2  
3  
4  
5  
6  
7  
8  
9  
10  
11  
12  
13  
14  
15  
16  
17  
18  
19  
20  
21  
22  
23  
24  
25  
26  
27  
28  
29  
30  
31  
32  
33  
34  
35  
36  
37  
38  
39  
40  
41  
42  
43  
44  
45  
46

|                       |                                                                                                                                                                                                                                                                                                                                               |                                                                                                                                   |                    |                   |                   |                                                                                           |                                                                                                                                                    |
|-----------------------|-----------------------------------------------------------------------------------------------------------------------------------------------------------------------------------------------------------------------------------------------------------------------------------------------------------------------------------------------|-----------------------------------------------------------------------------------------------------------------------------------|--------------------|-------------------|-------------------|-------------------------------------------------------------------------------------------|----------------------------------------------------------------------------------------------------------------------------------------------------|
| <p>2.e</p> <p>2.d</p> | <p><b>Cardiovascular health in the Irish Traveller community</b></p> <p>(iv) Slattery et al, 2011</p> <p><b>The prevalence of diabetes, Pre-diabetes and the Metabolic Syndrome in Irish Travellers</b></p> <p>Tan et al, 2009</p> <p><b>Traveller Health: Prevalence of Diabetes, Pre-Diabetes and the Metabolic Syndrome (abstract)</b></p> |                                                                                                                                   |                    |                   |                   |                                                                                           |                                                                                                                                                    |
| <p>3</p>              | <p>Cullinane et al, 2020.</p> <p><b>Phenotypic Variability in Leukoencephalopathy with Brain Calcifications and Cysts: Case reports of siblings from an Irish Traveller Family with a</b></p>                                                                                                                                                 | <p>To describe a case report of an Irish traveller with a leukoencephalopathy and an inherited mutation in the SNORD118 gene.</p> | <p>Case report</p> | <p>Not stated</p> | <p>Not stated</p> | <p><u>Inclusion:</u><br/>32 year old female Irish Traveller with leukoencephalopathy.</p> | <p>Clinical examination, family history, medical history including birth history, medications, histopathology investigations, genetic studies.</p> |

1  
2  
3  
4  
5  
6  
7  
8  
9  
10  
11  
12  
13  
14  
15  
16  
17  
18  
19  
20  
21  
22  
23  
24  
25  
26  
27  
28  
29  
30  
31  
32  
33  
34  
35  
36  
37  
38  
39  
40  
41  
42  
43  
44  
45  
46

|   |                                                                                                                                                 |                                                                                            |                   |            |                                                                                             |                                                                                                                                                                                                         |                                                                                                                                                                                                                                                                                                  |
|---|-------------------------------------------------------------------------------------------------------------------------------------------------|--------------------------------------------------------------------------------------------|-------------------|------------|---------------------------------------------------------------------------------------------|---------------------------------------------------------------------------------------------------------------------------------------------------------------------------------------------------------|--------------------------------------------------------------------------------------------------------------------------------------------------------------------------------------------------------------------------------------------------------------------------------------------------|
|   | <b>Homozygous SNORD118 Mutation?</b>                                                                                                            |                                                                                            |                   |            |                                                                                             |                                                                                                                                                                                                         |                                                                                                                                                                                                                                                                                                  |
| 4 | Flynn et al, 1989<br><b>Type II Hyperprolinaemia in a pedigree of Irish travellers (nomads)</b>                                                 | Aim: not stated but to investigate Type II hyperprolinaemia in Irish Travellers            | Descriptive study | Not stated | Not stated                                                                                  | <u>Inclusion:</u> not clearly stated but family of the 'proband' and close relatives                                                                                                                    | Testing of urine by two-dimensional paper chromatography, those showing prolinuria had blood samples taken in plain tubes and their serum or plasma proline concentrations were determined on a Loearte amino acid analyser.<br><br>In many cases no urine was collected but a blood sample was. |
| 5 | McCormick et al, 2001<br><b>Chronic inflammatory bowel disease and the 'over-clean' environment: Rarity in the Irish 'Traveller' community.</b> | Aim: to estimate the prevalence of inflammatory bowel disease in the traveller population. | Survey            | N/A        | Study was conducted in 11/26 counties in Ireland where 25/30 gastroenterologists were based | <u>Inclusion:</u> all gastroenterologists or surgeons working in the public health service in Ireland for at least three years at time of study, identified from the Irish Society of Gastroenterology. | Collected the number of members of the travelling community ever seen with inflammatory bowel disease and type of disease seen (Crohn's and Ulcerative colitis).                                                                                                                                 |

|   |                                                                                                                                      |                                                                                                                                                     |                               |                                                                                                                                                                                                                                                   |             |                                                                                                                                                                               |                                                                                                                                                                                                                                                                                                                                                                                                                                                                                |
|---|--------------------------------------------------------------------------------------------------------------------------------------|-----------------------------------------------------------------------------------------------------------------------------------------------------|-------------------------------|---------------------------------------------------------------------------------------------------------------------------------------------------------------------------------------------------------------------------------------------------|-------------|-------------------------------------------------------------------------------------------------------------------------------------------------------------------------------|--------------------------------------------------------------------------------------------------------------------------------------------------------------------------------------------------------------------------------------------------------------------------------------------------------------------------------------------------------------------------------------------------------------------------------------------------------------------------------|
| 6 | <p>Keohane et al, 2020.</p> <p><b>Microbiome and health implications for ethnic minorities after enforced lifestyle changes.</b></p> | <p>Aim: to investigate whether recent lifestyle changes are associated with differences in the microbiome and risk factors for chronic disease.</p> | <p>Cross-sectional study.</p> | <p>Within 30km radius of Cork city at one of five locations.</p> <p>Varied from permanent encampment, halting sites or social housing.</p> <p>NB 87% of participants were nomadic in childhood but their living conditions had since changed.</p> | <p>Cork</p> | <p><u>Inclusion:</u> None of the participants had taken antibiotics within 1 month and none were taking laxatives, corticosteroids, anti-inflammatories or anticoagulants</p> | <p>-Faecal microbiota of Irish Travellers were collected and compared with that of the settled background population in the same geographic locality and with that from individuals in other industrialised and non-industrialised countries.</p> <p>-Dietary habits were assessed via questionnaire</p> <p>-Body composition was assessed by DXA.</p> <p>-Well being was assessed by the WHO 5 Well Being Index</p> <p>-Personal, medical and family history was recorded</p> |
|---|--------------------------------------------------------------------------------------------------------------------------------------|-----------------------------------------------------------------------------------------------------------------------------------------------------|-------------------------------|---------------------------------------------------------------------------------------------------------------------------------------------------------------------------------------------------------------------------------------------------|-------------|-------------------------------------------------------------------------------------------------------------------------------------------------------------------------------|--------------------------------------------------------------------------------------------------------------------------------------------------------------------------------------------------------------------------------------------------------------------------------------------------------------------------------------------------------------------------------------------------------------------------------------------------------------------------------|

|   |                                                                                                                                                               |                                                                                                   |                            |                      |                                                                                                    |                                                                                                                                                                                                         |                                                                                                                                                                                                                                              |
|---|---------------------------------------------------------------------------------------------------------------------------------------------------------------|---------------------------------------------------------------------------------------------------|----------------------------|----------------------|----------------------------------------------------------------------------------------------------|---------------------------------------------------------------------------------------------------------------------------------------------------------------------------------------------------------|----------------------------------------------------------------------------------------------------------------------------------------------------------------------------------------------------------------------------------------------|
| 6 | <u>Mac Gabhann, 2011</u><br><b><u>Voices Unheard. A study of Irish travellers in Prison.</u></b>                                                              | <u>Aim: to explore issues faced by Irish Travellers in prison</u>                                 | <u>Mixed methods study</u> | <u>England/Wales</u> | <u>Prisons in England/Wales</u>                                                                    | <u>Inclusion-</u><br><u>-Irish travellers in prison</u><br><u>-prison staff in prisons in England and Wales.</u><br><br><u>Exclusion</u><br><u>-Young Offenders Institution</u>                         | <u>1.Survey of Irish Travellers across the prison estate and a response form for prison staff involving prison officials and</u><br><u>2.A series of focus groups and semi-structured interviews with Irish travellers in seven prisons.</u> |
| 7 | <u>McCormick et al, 2001</u><br><b><u>Chronic inflammatory bowel disease and the 'over-clean' environment: Rarity in the Irish 'Traveller' community.</u></b> | <u>Aim: to estimate the prevalence of inflammatory bowel disease in the traveller population.</u> | <u>Survey</u>              | <u>N/A</u>           | <u>Study was conducted in 11/26 counties in Ireland where 25/30 gastroenterologists were based</u> | <u>Inclusion: all gastroenterologists or surgeons working in the public health service in Ireland for at least three years at time of study, identified from the Irish Society of Gastroenterology.</u> | <u>Collected the number of members of the travelling community ever seen with inflammatory bowel disease and type of disease seen (Crohn's and Ulcerative colitis).</u>                                                                      |

|   |                                                                                                                                 |                                                                                                                                                                                                          |                                                 |                                                                                                                          |                                                 |                                                                                                                                                                                                                                                                                              |                                                                                                                                                                                                                                                                                                                                                                                                                |
|---|---------------------------------------------------------------------------------------------------------------------------------|----------------------------------------------------------------------------------------------------------------------------------------------------------------------------------------------------------|-------------------------------------------------|--------------------------------------------------------------------------------------------------------------------------|-------------------------------------------------|----------------------------------------------------------------------------------------------------------------------------------------------------------------------------------------------------------------------------------------------------------------------------------------------|----------------------------------------------------------------------------------------------------------------------------------------------------------------------------------------------------------------------------------------------------------------------------------------------------------------------------------------------------------------------------------------------------------------|
| 7 | <p>O'Toole et al, 2015.</p> <p><b>Tuberculosis incidence in the Irish Traveller population in Ireland from 2002 to 2013</b></p> | <p>To examine data regarding TB notifications in Ireland from 2002 to 2013.</p>                                                                                                                          | <p>Descriptive epidemiological study</p>        | <p>N/S</p>                                                                                                               | <p>N/S</p>                                      | <p><u>Inclusion:</u></p> <ul style="list-style-type: none"> <li>-all cases of TB reported by the National TB Surveillance System and CID;</li> <li>-cases reported in the Census of 2002, 2006 and 2011 and</li> <li>-cases reported by the AITHS.</li> </ul>                                | <p>Data were collected from National TB Surveillance System and Computerised Infections Disease Reporting system by the Health Surveillance Centre.</p> <p>Crude incidence rates (CIR) were calculated from the CSO and the AITHS data.</p> <p>5 year cumulative CIR values were calculated for 2009-2013.</p> <p>Average incidence rates for 2002-2013 were calculated for each age group using CSO data.</p> |
| 8 | <p><u>Murphy 2016</u></p> <p><u>Travelling through homelessness: A study of Traveller Homelessness in County Offaly</u></p>     | <p><u>Aim: To explore the experience of homelessness for Travellers in Co. Offaly and to describe how Travellers are accounted for within the definitions of homelessness used at a County level</u></p> | <p><u>Qualitative interview-based study</u></p> | <p><u>Current living conditions of participants varied but all had experienced homelessness in the previous year</u></p> | <p><u>Travellers residing in Co. Offaly</u></p> | <p><u>Inclusion: Member of the Travelling Community, living in County Offaly, or have been living in County Offaly before a movement to emergency/temporary accommodation outside of the country, have experienced homelessness within the previous 12 months, be aged over 18 years</u></p> | <p><u>'Life history interviews' were conducted with participants.</u></p>                                                                                                                                                                                                                                                                                                                                      |



1  
2  
3  
4  
5  
6  
7  
8  
9  
10  
11  
12  
13  
14  
15  
16  
17  
18  
19  
20  
21  
22  
23  
24  
25  
26  
27  
28  
29  
30  
31  
32  
33  
34  
35  
36  
37  
38  
39  
40  
41  
42  
43  
44  
45  
46

|    |                                                                                                                             |                                                                          |                                   |               |                                    |                                                                                                                                                                |                                                                                                                                                                                                                                                    |
|----|-----------------------------------------------------------------------------------------------------------------------------|--------------------------------------------------------------------------|-----------------------------------|---------------|------------------------------------|----------------------------------------------------------------------------------------------------------------------------------------------------------------|----------------------------------------------------------------------------------------------------------------------------------------------------------------------------------------------------------------------------------------------------|
| 98 | Nolan et al, 2017<br><b>Respiratory Health in an Irish Traveller Community</b>                                              | Aim: to assess respiratory health in Irish Travellers                    | Observational study               | N/S           | Travellers residing in West Dublin | Inclusion: Irish Travellers > 18 years                                                                                                                         | Subjective and objective data collected:<br><br>BMI, smoking history, respiratory symptoms, GP diagnosis of asthma and spirometry measures were taken                                                                                              |
| 9  | Mac Gabhann, 2011<br><b>Voices Unheard. A study of Irish travellers in Prison.</b>                                          | Aim: to explore issues faced by Irish Travellers in prison               | Mixed methods study               | England/Wales | Prisons in England/Wales           | <u>Inclusion-</u><br>-Irish travellers in prison<br>-prison staff in prisons in England and Wales.<br><br><u>Exclusion</u><br>-Young Offenders Institution     | 1. Survey of Irish Travellers across the prison estate and a response form for prison staff involving prison officials and<br><br>2. A series of focus groups and semi-structured interviews with Irish travellers in seven prisons.               |
| 10 | O'Toole et al, 2015.<br><b><u>Tuberculosis incidence in the Irish Traveller population in Ireland from 2002 to 2013</u></b> | To examine data regarding TB notifications in Ireland from 2002 to 2013. | Descriptive epidemiological study | N/S           | N/S                                | <u>Inclusion:</u><br>-all cases of TB reported by the National TB Surveillance System and CID.<br><br>-cases reported in the Census of 2002, 2006 and 2011 and | <u>Data were collected from National TB Surveillance System and Computerised Infections Disease Reporting system by the Health Surveillance Centre.</u><br><br><u>Crude incidence rates (CIR) were calculated from the CSO and the AITHS data.</u> |

|                                     |                                                                                                                                                                                                                                                                                                                                            |                                                                                                                                                               |                                                 |            |                                                                                                         |                                             |                                                                                                                                                                           |
|-------------------------------------|--------------------------------------------------------------------------------------------------------------------------------------------------------------------------------------------------------------------------------------------------------------------------------------------------------------------------------------------|---------------------------------------------------------------------------------------------------------------------------------------------------------------|-------------------------------------------------|------------|---------------------------------------------------------------------------------------------------------|---------------------------------------------|---------------------------------------------------------------------------------------------------------------------------------------------------------------------------|
|                                     |                                                                                                                                                                                                                                                                                                                                            |                                                                                                                                                               |                                                 |            |                                                                                                         | <u>-cases reported by the AITHS.</u>        | <u>5 year cumulative CIR values were calculated for 2009-2013.</u><br><br><u>Average incidence rates for 2002-2013 were calculated for each age group using CSO data.</u> |
| <u>11</u><br><u>11.</u><br><u>a</u> | <u>(i)Slattery et al, 2011</u><br><br><u>The point prevalence of diabetes, pre-diabetes and metabolic syndrome in Irish travellers</u><br><br><u>Abstracts</u>                                                                                                                                                                             | <u>Aim for all: to evaluate CVD risk factors and the point prevalence of diabetes, pre-diabetes and metabolic syndrome in the Irish Traveller population.</u> | <u>Observational pilot study- abstract only</u> | <u>N/S</u> | <u>Travellers living along 'western seaboard' recruited from Galway and Western Traveller movements</u> | <u>Inclusion: Travellers (&gt;18 years)</u> | <u>The following outcomes were evaluated: glucose levels, lipid profiles, oral glucose tolerance tests, blood pressure, weight, height and waist circumference.</u>       |
| <u>11.</u><br><u>b</u>              | <u>(ii) Slattery et al, 2011</u><br><br><u>The prevalence of diabetes, pre-diabetes and metabolic syndrome in Irish Travellers and the impact of lifestyle modification (abstract)</u><br><br><u>(iii) Slattery, Brennan, Canny, Sweeney, Ward, O' Shea and Dunne</u><br><br><u>Cardiovascular health in the Irish Traveller community</u> |                                                                                                                                                               |                                                 |            |                                                                                                         |                                             |                                                                                                                                                                           |



**Supplementary Table 2: Details of Study Participants**

| No        | Author                                                             | Number of Participants                                                                                           | Age (Mean + SD)                                                                                               | Biological Sex                                                  |
|-----------|--------------------------------------------------------------------|------------------------------------------------------------------------------------------------------------------|---------------------------------------------------------------------------------------------------------------|-----------------------------------------------------------------|
| <b>1</b>  | AITHS                                                              | 4,141 adults interviewed                                                                                         | 5-14 years: 26%<br>15-24 years: 21%<br>25-39 years: 21%<br>40-64 years: 13%<br>65 years+: 3%                  | Males: 1,817, Females: 2,324                                    |
| <b>1a</b> | Abdalla et al, 2013                                                | Non-fatal injury data in Travellers: n = 1663 Travellers                                                         | Aged 15 years +                                                                                               | Males = 702 (42%), Females = 961 (58%)                          |
| <b>1b</b> | Whelan et al, 2010 (abstract)<br>Kelleher et al 2012               | n= 2065                                                                                                          | <30 years: 48% (n=945)<br>30-44: 28.6% (n=563)<br>45-64: 18.4% (n=362)<br>>65: 5.1% (n=100)                   | Males: 43.5% (n=898), Females: 56.5% (n=1166)                   |
| <b>1c</b> | (i) McGorrian et al, 2010 (abstract)<br>(ii) McGorrian et al, 2012 | 2023<br>Age, sex and CVD data was available on 1878 of the total sample of 2023<br>Comparator population: 10,364 | 18-29: 41.8% (n=784)<br>30-34: 31.6% (n=594)<br>45-59: 18% (n=338)<br>60-74: 7.5% (n=140)<br>>75: 1.2% (n=22) | Traveller population: Males: 32% (n=601), Females: 68% (n=1277) |

|          |                                           |                                                                                                                                                 |                                                                                                                                   |                                                                                                               |
|----------|-------------------------------------------|-------------------------------------------------------------------------------------------------------------------------------------------------|-----------------------------------------------------------------------------------------------------------------------------------|---------------------------------------------------------------------------------------------------------------|
| <u>2</u> | <u>Cullinane, Lynch and Marnane, 2020</u> | <u>1</u>                                                                                                                                        | <u>32 years</u>                                                                                                                   | <u>Female</u>                                                                                                 |
| <u>3</u> | <u>Flynn et al 2020</u>                   | <u>*Whole sample: 312<br/>Urine from 280, blood from 147.<br/>Adult sample with Type II hyperprolinaemia: 7</u>                                 | <u>*Not stated for whole sample, but among 7 adults with Type II hyperprolinaemia the mean age was 27.9 years</u>                 | <u>*Not stated for whole sample, but among 7 adults with Type II hyperprolinaemia, 4 females and 3 males.</u> |
| <u>4</u> | <u>Hodgkins et al, 2006</u>               | <u>41</u>                                                                                                                                       | <u>Age range:<br/>15-19 years: 15%<br/>20-29 years: 51%<br/>30-39 years: 20%<br/>&gt;40 years: 14%</u>                            | <u>All female</u>                                                                                             |
| <u>5</u> | <u>Keohane et al, 2020</u>                | <u>118</u>                                                                                                                                      | <u>39 (+/-13 years sd)</u>                                                                                                        | <u>Males =53(44.9%), Females = 65 (55.1%)</u>                                                                 |
| <u>6</u> | <u>Mac Gabhann, C, 2011</u>               | <u>453 (0.6% of prison population). Of this, 296 survey forms were completed.<br/>57 travellers participated in the focus groups/interviews</u> | <u>Age range of IT prisoners:<br/>20-30: 39.5%<br/>30-40: 29.5%<br/>40-50: 17.1%<br/>15-20:8.5%<br/>50-60:4.3%<br/>60-70:1.1%</u> | <u>Male = 93.6%, female = 6.4%<br/>1 female prison was visited out of 7 in total.</u>                         |

Formatted: Highlight

Formatted: Highlight

Formatted: Highlight

Formatted: Highlight

|      |                                                                          |                                                                                                                                                            |                                                                                                            |                                                                                                        |
|------|--------------------------------------------------------------------------|------------------------------------------------------------------------------------------------------------------------------------------------------------|------------------------------------------------------------------------------------------------------------|--------------------------------------------------------------------------------------------------------|
| 7    | <a href="#">McCormick and Manning, 2001</a>                              | 25                                                                                                                                                         | N/S                                                                                                        | N/S                                                                                                    |
| 8    | <a href="#">Murphy, 2016</a>                                             | 14                                                                                                                                                         | N/S                                                                                                        | N/S                                                                                                    |
| 9    | <a href="#">Nolan et al, 2017</a>                                        | 35                                                                                                                                                         | <a href="#">Mean age 44 years (18-69)</a>                                                                  | <a href="#">Males: 16; Females: 19</a>                                                                 |
| 2a-e | 5 reports:<br><a href="#">Tan et al, 2009, Slattery et al 2010, 2011</a> | 354 travellers were screened in the largest study<br>( <a href="#">Tan et al, n=47; Slattery 2010, n=187; Slattery 2011, n=285; Slattery 2011, n=353</a> ) | <a href="#">Mean age 37 ± 11 (SD)</a>                                                                      | <a href="#">Males: 127; Females: 227</a>                                                               |
| 3    | <a href="#">Cullinane, Lynch and Marnane, 2020</a>                       | 1                                                                                                                                                          | 32 years                                                                                                   | Female                                                                                                 |
| 4    | <a href="#">Flynn et al 2020</a>                                         | *Whole sample: 312<br>Urine from 280, blood from 147.<br>Adult sample with Type II hyperprolinaemia: 7                                                     | *Not stated for whole sample, but among 7 adults with Type II hyperprolinaemia the mean age was 27.9 years | *Not stated for whole sample, but among 7 adults with Type II hyperprolinaemia, 4 females and 3 males. |
| 105  | <a href="#">McCormick and Manning, 2001</a>                              | 25                                                                                                                                                         | N/S                                                                                                        | N/S                                                                                                    |
| 6    | <a href="#">Keohane et al, 2020</a>                                      | 118                                                                                                                                                        | 39 (+/- 13 years sd)                                                                                       | Males = 53(44.9%), Females = 65 (55.1%)                                                                |

1  
2  
3  
4  
5  
6  
7  
8  
9  
10  
11  
12  
13  
14  
15  
16  
17  
18  
19  
20  
21  
22  
23  
24  
25  
26  
27  
28  
29  
30  
31  
32  
33  
34  
35  
36  
37  
38  
39  
40  
41  
42  
43  
44  
45  
46

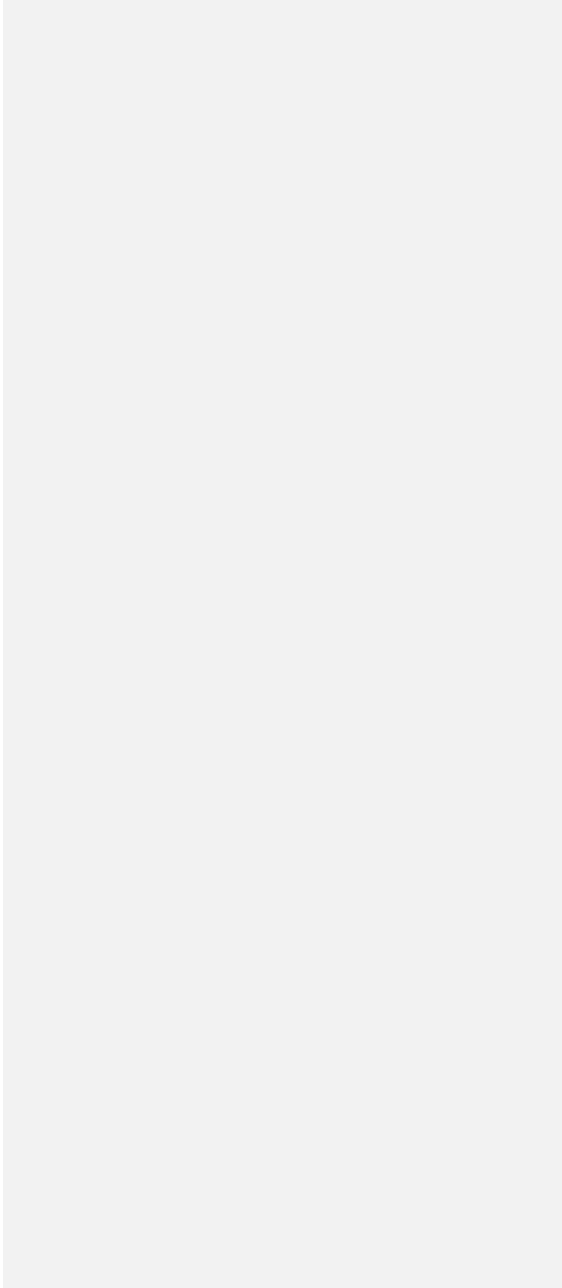

|     |                      |                                                                                                                                                    |                                                                                                                                                                                                                                                                                                                                                  |                                                                                          |
|-----|----------------------|----------------------------------------------------------------------------------------------------------------------------------------------------|--------------------------------------------------------------------------------------------------------------------------------------------------------------------------------------------------------------------------------------------------------------------------------------------------------------------------------------------------|------------------------------------------------------------------------------------------|
| 117 | O' Toole et al, 2015 | 2060                                                                                                                                               | <p>Travellers: majority of cases were in 0-34 yrs age group (mean of 26 years, median of 24 years)</p> <p>General population: majority of cases were in the 25 to &gt; 65 years age group (mean of 43 years, median of 38 years)</p> <p>Irish-born: majority of cases in 55 to &gt;65 years age group (mean of 49 years, median of 49 years)</p> | N/S                                                                                      |
| 8   | Nolan et al, 2017    | 35                                                                                                                                                 | Mean age 44 years (18-69)                                                                                                                                                                                                                                                                                                                        | Males: 16; Females: 19                                                                   |
| 9   | Mae Gabhann, C, 2011 | <p>453 (0.6% of prison population). Of this, 296 survey forms were completed.</p> <p>57 travellers participated in the focus groups/interviews</p> | <p>Age range of IT prisoners:</p> <p>20-30: 39.5%</p> <p>30-40: 29.5%</p> <p>40-50: 17.1%</p> <p>15-20: 8.5%</p> <p>50-60: 4.3%</p> <p>60-70: 1.1%</p>                                                                                                                                                                                           | <p>Male = 93.6%, female = 6.4%</p> <p>1 female prison was visited out of 7 in total.</p> |

|    |                                                                                                       |                                                                                                                                                        |                              |                                 |
|----|-------------------------------------------------------------------------------------------------------|--------------------------------------------------------------------------------------------------------------------------------------------------------|------------------------------|---------------------------------|
| 12 | <u>Slattery et al. 2011</u><br><u>5 reports:</u><br><u>Tan et al, 2009, Slattery et al 2010, 2011</u> | <u>354 travellers were screened in the largest study</u><br><u>(Tan et al, n=47; Slattery 2010, n=187; Slattery 2011, n=285; Slattery 2011, n=353)</u> | <u>Mean age 37 ± 11 (SD)</u> | <u>Males: 127; Females: 227</u> |
|----|-------------------------------------------------------------------------------------------------------|--------------------------------------------------------------------------------------------------------------------------------------------------------|------------------------------|---------------------------------|

N/S: not stated



## Preferred Reporting Items for Systematic reviews and Meta-Analyses extension for Scoping Reviews (PRISMA-ScR) Checklist

| SECTION                           | ITEM | PRISMA-ScR CHECKLIST ITEM                                                                                                                                                                                                                                                                                  | REPORTED ON PAGE #                 |
|-----------------------------------|------|------------------------------------------------------------------------------------------------------------------------------------------------------------------------------------------------------------------------------------------------------------------------------------------------------------|------------------------------------|
| <b>TITLE</b>                      |      |                                                                                                                                                                                                                                                                                                            |                                    |
| Title                             | 1    | Identify the report as a scoping review.                                                                                                                                                                                                                                                                   | Page 1                             |
| <b>ABSTRACT</b>                   |      |                                                                                                                                                                                                                                                                                                            |                                    |
| Structured summary                | 2    | Provide a structured summary that includes (as applicable): background, objectives, eligibility criteria, sources of evidence, charting methods, results, and conclusions that relate to the review questions and objectives.                                                                              | Page 1                             |
| <b>INTRODUCTION</b>               |      |                                                                                                                                                                                                                                                                                                            |                                    |
| Rationale                         | 3    | Describe the rationale for the review in the context of what is already known. Explain why the review questions/objectives lend themselves to a scoping review approach.                                                                                                                                   | Page 3                             |
| Objectives                        | 4    | Provide an explicit statement of the questions and objectives being addressed with reference to their key elements (e.g., population or participants, concepts, and context) or other relevant key elements used to conceptualize the review questions and/or objectives.                                  | Page 4                             |
| <b>METHODS</b>                    |      |                                                                                                                                                                                                                                                                                                            |                                    |
| Protocol and registration         | 5    | Indicate whether a review protocol exists; state if and where it can be accessed (e.g., a Web address); and if available, provide registration information, including the registration number.                                                                                                             | Not applicable                     |
| Eligibility criteria              | 6    | Specify characteristics of the sources of evidence used as eligibility criteria (e.g., years considered, language, and publication status), and provide a rationale.                                                                                                                                       | Page 4                             |
| Information sources*              | 7    | Describe all information sources in the search (e.g., databases with dates of coverage and contact with authors to identify additional sources), as well as the date the most recent search was executed.                                                                                                  | Page 4                             |
| Search                            | 8    | Present the full electronic search strategy for at least 1 database, including any limits used, such that it could be repeated.                                                                                                                                                                            | Supplementary file 1/Extended data |
| Selection of sources of evidence† | 9    | State the process for selecting sources of evidence (i.e., screening and eligibility) included in the scoping review.                                                                                                                                                                                      | Page 4                             |
| Data charting process‡            | 10   | Describe the methods of charting data from the included sources of evidence (e.g., calibrated forms or forms that have been tested by the team before their use, and whether data charting was done independently or in duplicate) and any processes for obtaining and confirming data from investigators. | Page 4                             |
| Data items                        | 11   | List and define all variables for which data were sought and any assumptions and simplifications made.                                                                                                                                                                                                     | Page 4                             |
| Critical appraisal of individual  | 12   | If done, provide a rationale for conducting a critical appraisal of included sources of evidence; describe                                                                                                                                                                                                 | Not applicable                     |

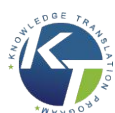

| SECTION                                       | ITEM | PRISMA-ScR CHECKLIST ITEM                                                                                                                                                                       | REPORTED ON PAGE #  |
|-----------------------------------------------|------|-------------------------------------------------------------------------------------------------------------------------------------------------------------------------------------------------|---------------------|
| sources of evidence§                          |      | the methods used and how this information was used in any data synthesis (if appropriate).                                                                                                      |                     |
| Synthesis of results                          | 13   | Describe the methods of handling and summarizing the data that were charted.                                                                                                                    | Page 5              |
| <b>RESULTS</b>                                |      |                                                                                                                                                                                                 |                     |
| Selection of sources of evidence              | 14   | Give numbers of sources of evidence screened, assessed for eligibility, and included in the review, with reasons for exclusions at each stage, ideally using a flow diagram.                    | Fig. 1              |
| Characteristics of sources of evidence        | 15   | For each source of evidence, present characteristics for which data were charted and provide the citations.                                                                                     | Tables              |
| Critical appraisal within sources of evidence | 16   | If done, present data on critical appraisal of included sources of evidence (see item 12).                                                                                                      | Not applicable      |
| Results of individual sources of evidence     | 17   | For each included source of evidence, present the relevant data that were charted that relate to the review questions and objectives.                                                           | Tables and page 5-6 |
| Synthesis of results                          | 18   | Summarize and/or present the charting results as they relate to the review questions and objectives.                                                                                            | Pages 5-6           |
| <b>DISCUSSION</b>                             |      |                                                                                                                                                                                                 |                     |
| Summary of evidence                           | 19   | Summarize the main results (including an overview of concepts, themes, and types of evidence available), link to the review questions and objectives, and consider the relevance to key groups. | Page 7              |
| Limitations                                   | 20   | Discuss the limitations of the scoping review process.                                                                                                                                          | Page 9              |
| Conclusions                                   | 21   | Provide a general interpretation of the results with respect to the review questions and objectives, as well as potential implications and/or next steps.                                       | Page 10             |
| <b>FUNDING</b>                                |      |                                                                                                                                                                                                 |                     |
| Funding                                       | 22   | Describe sources of funding for the included sources of evidence, as well as sources of funding for the scoping review. Describe the role of the funders of the scoping review.                 | Page 10             |

JBI = Joanna Briggs Institute; PRISMA-ScR = Preferred Reporting Items for Systematic reviews and Meta-Analyses extension for Scoping Reviews.

\* Where *sources of evidence* (see second footnote) are compiled from, such as bibliographic databases, social media platforms, and Web sites.

† A more inclusive/heterogeneous term used to account for the different types of evidence or data sources (e.g., quantitative and/or qualitative research, expert opinion, and policy documents) that may be eligible in a scoping review as opposed to only studies. This is not to be confused with *information sources* (see first footnote).

‡ The frameworks by Arksey and O'Malley (6) and Levac and colleagues (7) and the JBI guidance (4, 5) refer to the process of data extraction in a scoping review as data charting.

§ The process of systematically examining research evidence to assess its validity, results, and relevance before using it to inform a decision. This term is used for items 12 and 19 instead of "risk of bias" (which is more applicable to systematic reviews of interventions) to include and acknowledge the various sources of evidence that may be used in a scoping review (e.g., quantitative and/or qualitative research, expert opinion, and policy document).

From: Tricco AC, Lillie E, Zarin W, O'Brien KK, Colquhoun H, Levac D, et al. PRISMA Extension for Scoping Reviews (PRISMA-ScR): Checklist and Explanation. *Ann Intern Med.* 2018;169:467–473. doi: 10.7326/M18-0850.

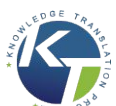

St. Michael's

Inspired Care.  
Inspiring Science.

For peer review only - <http://bmjopen.bmj.com/site/about/guidelines.xhtml>

# BMJ Open

## Scoping review on Physical Health Conditions in Mincéirs - Irish Travellers

|                                 |                                                                                                                                                                                                                                                                                             |
|---------------------------------|---------------------------------------------------------------------------------------------------------------------------------------------------------------------------------------------------------------------------------------------------------------------------------------------|
| Journal:                        | <i>BMJ Open</i>                                                                                                                                                                                                                                                                             |
| Manuscript ID                   | bmjopen-2022-068876.R2                                                                                                                                                                                                                                                                      |
| Article Type:                   | Original research                                                                                                                                                                                                                                                                           |
| Date Submitted by the Author:   | 26-Jun-2023                                                                                                                                                                                                                                                                                 |
| Complete List of Authors:       | Kennedy, Fiona; Trinity College Dublin, School of Medicine<br>Ward, Amy; Independent Public and Patient Expert<br>Mockler, David; Trinity College Dublin, John Stearne Library<br>Villani, Jacopo; Health Service Executive<br>Broderick, Julie; Trinity College Dublin, School of Medicine |
| <b>Primary Subject Heading</b>: | Public health                                                                                                                                                                                                                                                                               |
| Secondary Subject Heading:      | Cardiovascular medicine, Respiratory medicine                                                                                                                                                                                                                                               |
| Keywords:                       | PUBLIC HEALTH, PRIMARY CARE, Coronary heart disease < CARDIOLOGY                                                                                                                                                                                                                            |
|                                 |                                                                                                                                                                                                                                                                                             |

SCHOLARONE™  
Manuscripts



I, the Submitting Author has the right to grant and does grant on behalf of all authors of the Work (as defined in the below author licence), an exclusive licence and/or a non-exclusive licence for contributions from authors who are: i) UK Crown employees; ii) where BMJ has agreed a CC-BY licence shall apply, and/or iii) in accordance with the terms applicable for US Federal Government officers or employees acting as part of their official duties; on a worldwide, perpetual, irrevocable, royalty-free basis to BMJ Publishing Group Ltd ("BMJ") its licensees and where the relevant Journal is co-owned by BMJ to the co-owners of the Journal, to publish the Work in this journal and any other BMJ products and to exploit all rights, as set out in our [licence](#).

The Submitting Author accepts and understands that any supply made under these terms is made by BMJ to the Submitting Author unless you are acting as an employee on behalf of your employer or a postgraduate student of an affiliated institution which is paying any applicable article publishing charge ("APC") for Open Access articles. Where the Submitting Author wishes to make the Work available on an Open Access basis (and intends to pay the relevant APC), the terms of reuse of such Open Access shall be governed by a Creative Commons licence – details of these licences and which [Creative Commons](#) licence will apply to this Work are set out in our licence referred to above.

Other than as permitted in any relevant BMJ Author's Self Archiving Policies, I confirm this Work has not been accepted for publication elsewhere, is not being considered for publication elsewhere and does not duplicate material already published. I confirm all authors consent to publication of this Work and authorise the granting of this licence.

1  
2  
3 **Title page**  
4

5 **Title: Scoping review on Physical Health Conditions in Mincéirs - Irish Travellers**  
6  
7

8 **Author and co-author names:**  
9

10 Kennedy F<sup>1</sup>, Ward A<sup>2</sup>, Mockler D<sup>3</sup>, Villani J<sup>4</sup>, Broderick J<sup>1</sup>,  
11  
12

13 <sup>1</sup>School of Medicine, Trinity College Dublin, Ireland.  
14

15 <sup>2</sup>Independant Public and Patient Expert, Belfast, UK.  
16  
17

18 <sup>3</sup>John Stern Library, Trinity College Dublin, Ireland.  
19

20 <sup>4</sup>Health Service Executive, Dublin, Ireland.  
21  
22  
23  
24  
25

26 **Corresponding author details:**  
27

28 Name: Dr. Julie Broderick,  
29

30 Address: Trinity Centre for Health Sciences, St. James's Hospital, Dublin D08W9RT, Ireland  
31  
32

33 E-mail: [broderju@tcd.ie](mailto:broderju@tcd.ie)  
34

35 Telephone: +353 1 8962110  
36  
37

38 Fax number: no fax  
39  
40  
41  
42

43 **Keywords:** Irish travellers, physical health, Ethnic minority, inequality  
44

45 **Word count:** 2547  
46  
47  
48  
49  
50  
51  
52  
53  
54  
55  
56  
57  
58  
59  
60

## Abstract

**Objective:** The objective of this scoping review was to collate physical health conditions in Mincéirs - Irish Travellers

**Design:** Scoping review

**Search Strategy and charting method:** MEDLINE/PubMed, EMBASE, PEDro, AMED, CINAHL, PsycINFO, SCOPUS as well as reports and grey literature were searched for primary data reporting physical health conditions of Irish Travellers up to 04.04.23. Data was extracted, described and organised meaningfully into tables according to reported physical health conditions.

**Eligibility criteria:** The population was Travellers. The concept referred to physical health conditions. The context was Irish Travellers based in any location or setting. Exclusion criteria was data/research other than primary data relating to physical health conditions of Irish Travellers.

**Results:** From 198 citations generated from the database search, 11 unique studies (20 reports) were included in this scoping review, including n=7,397 participants. Driven by the data, physical health conditions were categorised into cardiovascular diseases, respiratory diseases, injuries/musculoskeletal/arthritis disorders, genetic disorders and gut/bowel conditions. This review showed that the metabolic syndrome, asthma, bronchitis, tuberculosis and intentional injuries were 2-3 times more prevalent in Irish Travellers compared to the background population. Genetic conditions were also described in a proportion of Travellers.

**Conclusions;** Overall Irish Travellers experience a disproportionate burden of physical health conditions compared to background populations. Health care providers need to be aware of the unique physical health burden experienced by many Irish Travellers. Multifaceted strategies are needed to improve the health profile of this vulnerable and marginalised group.

## Strengths and limitations of this study

- The methods for this scoping review were informed by the scoping review guidance from the Joanna Briggs Institute and it was reported according to the Preferred Reporting Items for Systematic Review and Meta-Analyses extension for Scoping Reviews (PRISMA-ScR) Checklist.
- Screening and data extraction processes were performed in duplicate.
- Stakeholder involvement was integral to this review, as a member of the Travelling community was one of the co-authors of this work.
- This was the first time all studies, reports and grey literature were comprehensively reviewed and collated to provide a broad picture of physical health conditions of Irish Travellers.
- As is the convention in scoping reviews, quality assessment was not undertaken – results must be interpreted in light of this.

## Introduction

Irish Travellers or 'Mincéirs', as known in their language of Shelta (1, 2), are a traditionally nomadic minority group primarily based on the island of Ireland (3). They also reside in the UK with smaller populations in Europe and the USA. The term 'Travellers' is used as a generic term to refer to people who have a historical and cultural tradition based on a mobile lifestyle and includes English and Welsh Gypsies, Irish Travellers and Scottish Travellers. Each of these groups has a separate ethnic identity that is particularly evident from their different languages but they share many aspects of a common cultural identity as traditional Travellers or Romani people (3, 4). In this review we specifically included 'Irish Travellers' only. As Irish Travellers in Ireland are known as 'Travellers' rather than 'Irish Travellers', the term 'Travellers' is used hereafter, recognising that the authors are referring to Travellers of Irish descent.

The number of Travellers recorded in the Irish Census of 2016 was reported to be 30,987 accounting for 0.7% of the general population (5). In the 2011 Census for England and

1  
2  
3  
4  
5  
6  
7  
8  
9  
10  
11  
12  
13  
14  
15  
16  
17  
18  
19  
20  
21  
22  
23  
24  
25  
26  
27  
28  
29  
30  
31  
32  
33  
34  
35  
36  
37  
38  
39  
40  
41  
42  
43  
44  
45  
46  
47  
48  
49  
50  
51  
52  
53  
54  
55  
56  
57  
58  
59  
60

Wales, 58,000 people identified as Gypsy or Traveller (Irish origin) which may be an underestimation of the actual number (4).

Travellers have been recognised formally as a distinct indigenous ethnic group in Ireland since 2017, which should have marked a positive step towards an inclusive society (6). Yet, Travellers are 22 times more likely to experience discrimination than the general population (7) and they remain a severely marginalised group (8, 9). Consequently, Travellers face poor health and experience a higher burden of mortality and morbidity than the general population (8).

Traveller life expectancy has been reported to be 66 years, 11.5-15.1 years less than that of the general population (8). The infant mortality rate is 3.6 times higher than the general population (8) and ten percent of Travellers do not reach their 2nd birthday (10). The disproportionate mortality may be due to poor health as well as other factors such as inadequate housing, education and literacy levels (8). Mental health disorders are prevalent, with reported suicide rates six-seven fold higher than the general population (8). Physical health appears to be poorer (8) but the scale and range of physical health conditions experienced by Travellers is not well known. The aim of this review was to summarise available data and categorise physical health conditions in Travellers. Due to the exploratory nature and lack of delineation of this area identified by an initial test review, a scoping review methodology was chosen.

The objectives of this review were;

- (i) To explore the extent, breadth and nature of the literature with regards to physical health conditions experienced by Travellers.
- (ii) To categorise the evidence about physical health in Travellers.
- (iii) To compare physical health conditions of Travellers to the background population where possible.



## Methodology

The protocol for this review was published on Open Science Framework (<https://osf.io/v6etg/>). This review followed the Joanna Briggs Institute's (JBI) methodology for scoping reviews (11) and was also informed by the original framework of Arksey(12), and enhancements proposed by Levac (13). It was checked against the Preferred Reporting Items for Systematic reviews and Meta-Analyses extension for Scoping Reviews (PRISMA-ScR) Checklist (14). The six stage framework developed by Arksey and O' Malley (2005) (12) was used to structure this review.

Stage one refers to identifying the research question. The primary research question was; what is known about the physical health of Travellers. The secondary research question was; how does the physical health of Travellers compare to the background population, where this information was available.

Stage two refers to identifying relevant studies. A comprehensive search strategy was developed collaboratively with a skilled research librarian (DM). The following electronic databases were searched: MEDLINE/PubMed, EMBASE, PEDro, AMED, CINAHL, PsycINFO, SCOPUS (see extended data). The original search was performed on 09.03.21 (re-run 02.11.21 and 04.04.23). The search strategy was generated from a combination of free text search terms, text words, Medical Subject Headings (MeSH) terms and keywords with Boolean operators. The full search details are outlined in Supplementary Box 1. Authors of abstracts included in this review were contacted to ascertain if full text versions were available. Reference lists of included studies were examined for relevant studies. Grey literature was searched using the CADTH Grey Matters tool and the following websites were checked; Lenus, ProQuest E-Thesis Portal and RIAN. For each of these sources the terms 'Travellers' and 'Health' were searched. For each, the website was 'hand searched' for potentially relevant documents. The first ten pages of each search's hits were reviewed for potentially relevant material. A targeted search of Google Scholar and WorldCat search engines was also performed.

Stage three refers to study selection. This was based on the Population, Concept, Context (PPC) mnemonic (11). The population was Travellers. The concept referred to physical health conditions. There is no single definition of physical health conditions. We took this to

1  
2  
3 mean any condition, including a disease or event (e.g. injury) that impacts the physical  
4 health system. The context was quite broad and included Irish Travellers based in any  
5 location or setting. It was originally envisaged that this review would encompass 'health' in  
6 a more holistic way including mental and physical health conditions. Given the large scope  
7 of a review including both dimensions of health, a pragmatic decision was taken to consider  
8 physical health conditions only in this review and refine the search strategy appropriately  
9 (12, 13, 15) . This included primary data documenting prevalence of physical health  
10 conditions and as well as perceptions of Travellers regarding physical health conditions  
11 experienced. Only English language sources were searched as it was expected the literature  
12 would be concentrated mainly in Ireland and the UK/other English-speaking jurisdictions. No  
13 date restriction was applied to generate a purposefully broad scope of the available  
14 literature. Both quantitative and qualitative study designs were included, although it was  
15 expected data would be primarily quantitative in nature. Studies which examined physical  
16 health conditions of Travellers (>18 years) as a primary or secondary outcome measure  
17 were included. If intervention studies were included, only baseline data was extracted.  
18 Exclusion criteria were data which did not related to physical health conditions of Irish  
19 Travellers.  
20  
21  
22  
23  
24  
25  
26  
27  
28  
29  
30  
31  
32  
33

34  
35 Duplications were removed and studies were imported into Covidence™ for title and  
36 abstract screening which took place independently by two reviewers (JB/FK). Both authors  
37 then conducted a full-text evaluation. If necessary, discrepancies were resolved by  
38 consensus by including a third author.  
39  
40  
41  
42

43 Stage four refers to charting the data. Relevant data pertaining to physical health conditions  
44 of Travellers was retrieved. Two reviewers (J.B. and F.K.) independently extracted data using  
45 a bespoke data extraction instrument (11). The data extraction process took place from  
46 October 2021 – March 2022. The data extraction instrument was designed by review  
47 authors (JB and FK) based on the JBI template source of evidence details, characteristics,  
48 and results. Two review authors (JB and FK) independently extracted data from the first ten  
49 studies using the initially developed data extraction form and met to ascertain its suitability.  
50 Minor changes to the data extraction tool were made at this stage. The data extraction  
51 instrument collected the following data relating to included studies (author, title, year of  
52 publication, study aims/objectives, research design, living arrangements, location of  
53  
54  
55  
56  
57  
58  
59  
60

1  
2  
3 participants, inclusion/exclusion criteria, data collection method, number of participants,  
4 age (mean and standard deviation), biological sex, details of physical health condition  
5 reported and physical health conditions in the background comparison population. Any  
6 differences were resolved by consensus discussion. A third author (D.M.) was available if  
7 disparities emerged between reviewers.  
8  
9  
10  
11

12  
13 Stage five refers to collating, summarizing and reporting of results. Data were reported for  
14 each selected study within each category as agreed on in the previous stage. Findings were  
15 mapped to summarize the range of evidence to present the breadth and depth of the field  
16 (13). Tables were also presented to outline the research findings as defined in Stage four.  
17 As per scoping review methodological enhancements proposed by Levac (13), results were  
18 presented numerically and in a data driven approach were categorized meaningfully into  
19 subcategories of physical health conditions. Using a data-driven approach, physical health  
20 conditions were categorized in the following way; cardiovascular disease (CVD), respiratory,  
21 genetic, injuries/musculoskeletal/arthritis disorders and gut/bowel conditions. Where  
22 available, data were compared to the background population. Implications for policy,  
23 practice and research were identified. Entries were independently checked by two authors  
24 (JB and FK).  
25  
26  
27  
28  
29  
30  
31  
32  
33  
34

### 35 **Patient and Public Involvement**

36  
37  
38 Stage six refers to patient and public involvement. Stakeholder/public involvement was  
39 integral to this review. The initial research question was generated from the principal author  
40 who has an interest broadly in the physical health of marginalised groups. In the planning  
41 phase, the research question evolved and was refined by engaging informally with the  
42 research team and a member of the Travelling community (AW) about this topic. In  
43 conversation, AW identified the poor physical health and prevalence of physical health  
44 conditions among many Travellers which consolidated the purpose of conducting this  
45 review. AW was then personally invited to join the review team. Her involvement began  
46 after the initial database search and continued throughout the data synthesis and write-up  
47 phases. A number of online meetings took place during which AW shared her perspectives  
48 verbally and in written form on early results, drafts and conclusions of the review as they  
49 emerged.  
50  
51  
52  
53  
54  
55  
56  
57  
58  
59  
60

## Results

### Studies identified

After removal of duplicates, 197 studies were identified. After excluding irrelevant studies, a total of 11 studies and 18 reports were deemed eligible for inclusion. Quantitative studies predominated (n=8), with two qualitative studies (16, 17) and one mixed methods study (18). Three were reports generated from the grey literature search (9,17,18) while the remaining were generated from the systematic database search. The PRISMA flow chart summarises the search strategy (Figure 1).

Figure 1: PRISMA flow diagram ABOUT HERE

Study characteristics are shown in Supplementary Table 1. Over seven thousand participants (n=7397) were included with more than half (n=4,141) from the AITHS (8). One study took part in the UK(18) and the remaining studies were based in Ireland, North and South. Living arrangements of participants were reported in three studies<sup>9</sup> (18, 19). In one study, a quarter (n=515) lived in a caravan, a trailer or a chalet(19) and in another, participants' accommodation included encampments, halting sites and social housing (20). All (Traveller) participants in Mac Gabhann's study (n=296) resided in prisons in England and Wales(18).

Participants' characteristics are shown in Supplementary Table 2. The majority of studies included males and females with overall 61% of participants female. The UK based study included mostly male participants (93.6% male) (18) while one study was female only (21).The age profile of participants was predominantly young, with the majority in their second, third and fourth decade. Tables 1-4 summarise physical health conditions from included primary studies.

**Table 1: Cardiovascular diseases**

| <b>Physical Health Variable</b> | <b>Authors</b>                              | <b>Result</b>                                                                                        |
|---------------------------------|---------------------------------------------|------------------------------------------------------------------------------------------------------|
| <b>Tri-glyceride levels</b>     | Tan et al 2009(22)                          | High triglyceride level 23% (n=49%), males 89% (n=8), females 40% (n=15)                             |
| <b>HDL cholesterol</b>          | Tan et al 2009(22)                          | Low HDL level, 62% (n=29), males 78%, females 58% (n=22)                                             |
| <b>Impaired Fasting Glucose</b> | Tan et al 2009(22)                          | Total: 19% (n=9), Males: 22% (n=2), females 18% (n=7)                                                |
| <b>Angina</b>                   | All-Ireland Traveller Health Study, 2012(8) | 4.3% Travellers, Republic of Ireland (background population 2%)<br>2.1% Travellers, Northern Ireland |
| <b>Diabetes Mellitus</b>        | All-Ireland Traveller Health Study, 2012(8) | 6.1% Travellers, Republic of Ireland (background population 3%)<br>6.1% Travellers, Northern Ireland |
|                                 | Slattery et al, 2011(23)                    | 5.9% Traveller sample (background population 4.3%)                                                   |
|                                 | Tan et al 2009(22)                          | 8.5% Traveller sample (background population 4.3%)                                                   |
| <b>Pre-diabetes</b>             | Slattery et al, 2011(24)                    | 9.3% (background population 6.2%)                                                                    |
|                                 | Tan et al 2009(22)                          | 11.6% Traveller sample (background population 6.3%)                                                  |

|                                            |                                            |                                                                                                                                                                                                                                                                                                                                                                                                                                                                                                                                                                                                                                                                                                                                                                                                                                                                                                   |
|--------------------------------------------|--------------------------------------------|---------------------------------------------------------------------------------------------------------------------------------------------------------------------------------------------------------------------------------------------------------------------------------------------------------------------------------------------------------------------------------------------------------------------------------------------------------------------------------------------------------------------------------------------------------------------------------------------------------------------------------------------------------------------------------------------------------------------------------------------------------------------------------------------------------------------------------------------------------------------------------------------------|
| <b>'Heart Attack'</b>                      | All-Ireland Traveller Health Study 2012(8) | 2.3% Travellers, Republic of Ireland (background population <1%)<br>2.1% Travellers, Northern Ireland                                                                                                                                                                                                                                                                                                                                                                                                                                                                                                                                                                                                                                                                                                                                                                                             |
| <b>Systolic Blood Pressure ≥ 130mmHg</b>   | Tan et al 2009(22)                         | Total 43% (n=20), Males: 22% (n=2), Females 47% (n=18)                                                                                                                                                                                                                                                                                                                                                                                                                                                                                                                                                                                                                                                                                                                                                                                                                                            |
| <b>Diastolic Blood Presssure ≥ 85 mmHg</b> | Tan et al 2009(22)                         | Total 38% (n=18), Males: 44% (n=4), Females 37% (n=14)                                                                                                                                                                                                                                                                                                                                                                                                                                                                                                                                                                                                                                                                                                                                                                                                                                            |
| <b>Metabolic Syndrome</b>                  | Slattery et al 2011(23)                    | 39.3% Traveller sample (background population 21%)                                                                                                                                                                                                                                                                                                                                                                                                                                                                                                                                                                                                                                                                                                                                                                                                                                                |
|                                            | Tan et al 2009(22)                         | 53.2% Traveller sample (background population 21.0%)                                                                                                                                                                                                                                                                                                                                                                                                                                                                                                                                                                                                                                                                                                                                                                                                                                              |
| <b>Self-reported CVD</b>                   | McGorrian et al, 2010/2012(25, 26)         | <p>-Self-reported CVD was 5.6% (5.8% in men and 5.5% in women), compared to 16.1% in the general Irish population.</p> <p>-The prevalence of CVD increased with age and the Travellers who reported CVD were older (mean age 54.06 ±14.48 V 34.99 ±13.85).</p> <p>-No significant difference in the prevalence of reported CVD, hypercholesterolaemia and hypertension between the comparator groups was found.</p> <p>-However, diabetes, smoking, consumption of salt and fried food and physical inactivity is more frequent in Travellers.</p> <p>-Significant positive association was found between CVD and age, high cholesterol, hypertension, diabetes and current/former versus never smoking, drinking alcohol and increasing discrimination.</p> <p>-Significant negative association was found between CVD and self-rated health, consumption of fried food and trust of others.</p> |

1  
2  
3  
4  
5  
6  
7  
8  
9  
10  
11  
12  
13  
14  
15  
16  
17  
18  
19  
20  
21  
22  
23  
24  
25  
26  
27  
28  
29  
30  
31  
32  
33  
34  
35  
36  
37  
38  
39  
40  
41  
42  
43  
44  
45  
46

|  |                          |                                                                                    |
|--|--------------------------|------------------------------------------------------------------------------------|
|  | Kelleher et al, 2012(19) | -Self-reported blood pressure, cholesterol, diabetes screening by GP (48%, n=1996) |
|--|--------------------------|------------------------------------------------------------------------------------|

CVD; cardiovascular disease, GP; General Practitioner, HDL; high density lipoproteins, LDL; low density lipo-proteins, ROI: Republic of Ireland

**Table 2: Respiratory diseases**

| Disease and variable measured | Authors                 | Result                                                                                                                                                                                                                                                                                                                                                                                                                                                                                                                                                                                                                                                                                                                                                                                                                                                                                                                                                                                                                                                                                                                                                                                                                                                                                                                                                                                                                                                                                                             |
|-------------------------------|-------------------------|--------------------------------------------------------------------------------------------------------------------------------------------------------------------------------------------------------------------------------------------------------------------------------------------------------------------------------------------------------------------------------------------------------------------------------------------------------------------------------------------------------------------------------------------------------------------------------------------------------------------------------------------------------------------------------------------------------------------------------------------------------------------------------------------------------------------------------------------------------------------------------------------------------------------------------------------------------------------------------------------------------------------------------------------------------------------------------------------------------------------------------------------------------------------------------------------------------------------------------------------------------------------------------------------------------------------------------------------------------------------------------------------------------------------------------------------------------------------------------------------------------------------|
| <b>TB:</b> incidence rate     | O'Toole et al, 2015(27) | <ul style="list-style-type: none"> <li>- Higher incidence rate and younger age in Irish travellers than white Irish-born and general population:</li> <li>- CIR of TB in the Traveller population was &lt;5/100000 population per annum from 2002-2009. This increased after 2010 and CIR &gt;10/100000 population per annum 2011-2013.</li> <li>- From 2002-2013, the CIR of TB decreased in the general population (10.5/100000 in 2002 to 8.3/100000 in 2013).</li> <li>- CIR for TB in Travellers was about 3-fold higher than that of white born Irish population in 2011 and 2012.</li> <li>- In 2013, the CIR in Travellers increased to 40.6/100000 following an outbreak.</li> <li>- 5-year cumulative CIR 2009-2013: <ul style="list-style-type: none"> <li>o Travellers: 81.4/100000</li> <li>o General pop: 45.5/100000</li> <li>o White Irish-born: 27.3/100000</li> </ul> </li> <li>- When All-Ireland Traveller Health Study population data was used to calculate CIR rather than the Central Statistics Office Census data, the CIR was lower. Regardless of the method of data collection of CIR, the rate was still higher in Irish travellers than the general population/white Irish born.</li> <li>- Average incidence by age was higher for the Traveller population, majority in 0-34 age group, compared to the general population where the majority was in the 25-65 age group and in the white Irish-born population where the majority was in the 55 to &gt; 65 age group.</li> </ul> |

1  
2  
3  
4  
5  
6  
7  
8  
9  
10  
11  
12  
13  
14  
15  
16  
17  
18  
19  
20  
21  
22  
23  
24  
25  
26  
27  
28  
29  
30  
31  
32  
33  
34  
35  
36  
37  
38  
39  
40  
41  
42  
43  
44  
45  
46

|                                                                                                                                     |                                              |                                                                                                                                                                                                                                                                                                                                     |
|-------------------------------------------------------------------------------------------------------------------------------------|----------------------------------------------|-------------------------------------------------------------------------------------------------------------------------------------------------------------------------------------------------------------------------------------------------------------------------------------------------------------------------------------|
| <b>Chronic Obstructive Pulmonary Disease:</b> number of smokers, presence of respiratory symptoms, diagnosis of asthma & spirometry | Nolan et al, 2017(28)                        | <ul style="list-style-type: none"> <li>- 41% were current smokers, 6/14 non-smokers regularly exposed to passive smoke</li> <li>- 86% of smokers reported respiratory symptoms including cough, wheeze and shortness of breath</li> <li>- 10/35 had GP diagnosis of asthma</li> <li>- 23% (7/30) had obstructive pattern</li> </ul> |
| <b>Chronic bronchitis</b>                                                                                                           | All-Ireland Traveller Health Study , 2012(8) | <ul style="list-style-type: none"> <li>- 12% Travellers Republic of Ireland, 9.4% Travellers Northern Ireland, (background population 3%)</li> </ul>                                                                                                                                                                                |
| <b>Asthma</b>                                                                                                                       | All-Ireland Traveller Health Study , 2012(8) | <ul style="list-style-type: none"> <li>- 12.5% Travellers Republic of Ireland, 25.7% Travellers Northern Ireland, (background population 6%)</li> </ul>                                                                                                                                                                             |

*CIR; cumulative incidence ratio, GP: General Practitioner, TB; tuberculosis*



**Table 3: Injuries/Musculoskeletal/Arthritic disorders**

| Details of non-fatal injuries                                          | Authors                                     | Result                                                                                                                                                                                                                                                                                                                                                                                                                                                                                                                                                                                                                                                                                                                                                                   |
|------------------------------------------------------------------------|---------------------------------------------|--------------------------------------------------------------------------------------------------------------------------------------------------------------------------------------------------------------------------------------------------------------------------------------------------------------------------------------------------------------------------------------------------------------------------------------------------------------------------------------------------------------------------------------------------------------------------------------------------------------------------------------------------------------------------------------------------------------------------------------------------------------------------|
| <b>'Back condition'</b>                                                | All Ireland Traveller Health Study, 2012(8) | <ul style="list-style-type: none"> <li>- 30.4% Travellers, Republic of Ireland (background population 16%)</li> <li>- 25.2% Travellers, Northern Ireland</li> </ul>                                                                                                                                                                                                                                                                                                                                                                                                                                                                                                                                                                                                      |
| <b>Arthritis</b>                                                       | All Ireland Traveller Health Study, 2012(8) | <ul style="list-style-type: none"> <li>- 13.8% Travellers, Republic of Ireland (background population 11%)</li> <li>- 13.2% Travellers, Northern Ireland</li> </ul>                                                                                                                                                                                                                                                                                                                                                                                                                                                                                                                                                                                                      |
| <b>Injury<br/>(prevalence of injury and intentional/unintentional)</b> | Abdalla et al, 2013(29)                     | <ul style="list-style-type: none"> <li>- Travellers had a higher incidence of intentional injuries, SIR = 224 for intentional injuries (male = 181, female = 268)</li> <li>- Travellers had a lower incidence of unintentional injury than the general population: SIR = 44 (male = 42, female = 46).</li> <li>- Travellers over 65 years were twice as likely to report an injury than the general population.               <ul style="list-style-type: none"> <li>o Overall injury SIR for Travellers aged 15-64 years = 59 &amp; 65 years +=208</li> <li>o Intentional injury SIR for Travellers &gt;65 years = 517</li> <li>o Unintentional injury SIR for Travellers &gt;65years= 137. Overall injury SIR for Travellers &gt;65years = 208.</li> </ul> </li> </ul> |
| <b>Injury</b>                                                          | Kelleher et al 2012(19)                     | 'Free of injuries in the last 2 years vs. one or more injury': 88.7% (n=1800)                                                                                                                                                                                                                                                                                                                                                                                                                                                                                                                                                                                                                                                                                            |

1  
2  
3  
4  
5  
6  
7  
8  
9  
10  
11  
12  
13  
14  
15  
16  
17  
18  
19  
20  
21  
22  
23  
24  
25  
26  
27  
28  
29  
30  
31  
32  
33  
34  
35  
36  
37  
38  
39  
40  
41  
42  
43  
44  
45  
46

|                                                                                                  |  |  |
|--------------------------------------------------------------------------------------------------|--|--|
| <b>(Question from Dimension 4 Lifestyle and health behaviour of the health status interview)</b> |  |  |
|--------------------------------------------------------------------------------------------------|--|--|

*SIR: standardised incidence ratio*

For peer review only

**Table 4: Genetic diseases, other conditions and self-rated health**

| Details of Genetic disease                |                                                              | Author                                      | Result                                                                                                                                                                                                                                                                                                                                                                                                                                                                                                                                                   |
|-------------------------------------------|--------------------------------------------------------------|---------------------------------------------|----------------------------------------------------------------------------------------------------------------------------------------------------------------------------------------------------------------------------------------------------------------------------------------------------------------------------------------------------------------------------------------------------------------------------------------------------------------------------------------------------------------------------------------------------------|
| <b>Phenotype</b>                          | Medical history, clinical observation & physical examination | Cullinane, Lynch and Marnane, 2020(30)      | Case of leukoencephalopathy described. Patient presented with short stature, pes planus, hypotonia, history of osteogenic sarcoma<br><br>Participants' medical history: Epilepsy, multiple cerebral cysts (removed by craniotomy/cyst excisions over the course of 15 years from age 5), left ventriculo-peritoneal shunt inserted and later removed, multiple vascular malformations of the capillary-cavernous type with associated haematomas, surrounding gliosis, hemosiderin deposition, Rosenthal fibres and areas of white matter calcification. |
|                                           | Blood & urine testing                                        | Flynn et al 1989(31)                        | Type II hyperprolinaemia (n=13, including 7 adults)<br><br>Mild hyperprolinaemia (n=50, proportion of adults unclear)<br><br>Seizures from hyperprolinaemia: 4 adults suffered grand mal seizures, 1 of whom had a severe mental handicap, 1 suffered from petit mal seizures.                                                                                                                                                                                                                                                                           |
| <b>Genotype</b>                           | Whole exome sequencing                                       | Cullinane, Lynch and Marnane, 2020(30)      | Identified a homozygous variant of the SNORD118 gene. The sister of this case, with milder symptoms was homozygous for the same variant.                                                                                                                                                                                                                                                                                                                                                                                                                 |
| <b>Other conditions</b>                   |                                                              |                                             |                                                                                                                                                                                                                                                                                                                                                                                                                                                                                                                                                          |
| <b>Chronic inflammatory bowel disease</b> |                                                              | McCormick et al, 2001(32)                   | No recorded traveller with idiopathic inflammatory bowel disease                                                                                                                                                                                                                                                                                                                                                                                                                                                                                         |
| <b>Cancer</b>                             |                                                              | All-Ireland Traveller Health study, 2012(8) | 1% Travellers, Republic of Ireland (background population 1%)<br>0.3% Travellers, Northern Ireland                                                                                                                                                                                                                                                                                                                                                                                                                                                       |
| <b>Physical Health problems</b>           |                                                              | Mac Gabhann(18)                             | Out of sample n=281 Travellers in a UK prison, the following physical health conditions were reported.<br>asthma (n=12), 'back' problems (n=10), epilepsy (n=9) and arthritis (n=7)                                                                                                                                                                                                                                                                                                                                                                      |

|                                                                                         |                                          |                  |
|-----------------------------------------------------------------------------------------|------------------------------------------|------------------|
| <b>Self-rated Health:</b>                                                               |                                          |                  |
| 'Chronic health condition diagnosed by GP'                                              | Kelleher et al, 2012(19)                 | 41.5% (n = 2022) |
| Physical Health not good $\geq$ 1 day in last month                                     | (Dimension 6 in Health Status Interview) | 59.3% (n=1843)   |
| Daily activity or work limited due to a long-term illness, health problem or disability |                                          | 17.2% (2012)     |

\*Doctor diagnosed illness in previous 12 months, GP; general practitioner, UK; United Kingdom

Three studies reported cardiovascular diseases (Table 1). Tan et al, (2009) (22) reported the following cardiovascular disease (CVD) risk factors among study participants (n=47); high triglyceride levels (23%), low HDL cholesterol levels (62%), impaired fasting glucose levels (19%) and hypertension (systolic BP  $\geq$  130mmHg 43% and diastolic BP  $\geq$  85mmHg 38%). The prevalence of diabetes, pre-diabetes and the metabolic syndrome evaluated in a series of pilot studies was higher than the general population(23). The incidence of metabolic disease was over twice as high among Travellers (53.2%) compared to the background population (21%)(23). Self-report CVD was approximately 5%, compared to a self-reported CVD rate of 16.1% in the general population (8).

Two studies explored respiratory conditions (Table 2) (27, 28). One study reported a five-year tuberculosis (TB) cumulative crude incidence rate (CIR) of 81.4/100000 in Travellers compared to 45.5/100000 and 27.3/100000 in the general population and white Irish-born population, respectively (27). Rates of TB were therefore three-fold higher in Travellers than the white Irish-born population (27). Nolan et al (2017) reported that 41% of Travellers were smokers and 86% of these smokers reported respiratory symptoms including cough, wheeze and shortness of breath while 23% had an obstructive respiratory disease pattern (28). Respiratory conditions (bronchitis and asthma) were rated as the second most common physical health condition, with a prevalence of 24.5% among Travellers in the Republic of

1  
2  
3 Ireland and 35.1% in Northern Ireland (8). This is considerably higher than available  
4 comparison Republic of Ireland background population of 3% with chronic bronchitis (33).

5  
6  
7  
8 Abdalla et al (2020) evaluated injuries (29) (Table 3). They demonstrated that the  
9 prevalence of unintentional non-fatal injury in Travellers < 65 years was lower [Standardised  
10 incidence ratio (SIR)=40], while the prevalence of intentional injury was higher (SIR=213)  
11 than the general population. Travellers > 65 years had higher injury rates for both  
12 unintentional (SIR=137) and intentional injuries (SIR=517). Common physical health  
13 problems reported by a population of 281 Travellers in prison in the U.K. were asthma  
14 (n=12), 'back' problems (n=10), epilepsy (n=9) and arthritis (n=7) (18).

15  
16  
17  
18  
19  
20  
21  
22 Two studies (Table 4) examined genetic disorders both inherited in an autosomal recessive  
23 manner. One was a case report of a 32 year-old female who inherited a rare  
24 leukoencephalopathy and severe central nervous system (CNS) impairment was  
25 reported(30). Flynn et al (1989) also reported CNS dysfunction in Travellers due to the  
26 presence of Type II hyperprolinemia (31).

27  
28  
29  
30  
31  
32 One study examined effects of lifestyle changes on the microbiome and its associated risks  
33 for chronic disease (20). Results demonstrated that Travellers retained a microbiota similar  
34 to that of non-industrialised populations due to halting site dwelling, number of siblings and  
35 animal ownership. Another study evaluating the prevalence of inflammatory bowel disease  
36 found no records of idiopathic bowel disease in the Traveller population.

37  
38  
39  
40  
41  
42 Most Travellers described their health as very good (59%) or good (28%)(8). Comparable  
43 figures among the general population are similar at 62% and 29%, respectively (33). Twelve  
44 percent of Travellers described their health as fair, bad or very bad(8). The corresponding  
45 figure for non-Travellers was 9%(33). Breaking this down for 34-54 year age group, 31% of  
46 Travellers(8) categorised their health as 'very good' compared to 57% among non-  
47 Travellers(33). In this age group, 29% of Travellers(8) had health categorised as 'fair', 'bad'  
48 or 'very bad' while the comparable figure in non-Travellers was 8% (33).

49  
50  
51  
52  
53  
54  
55  
56 Three studies conducted qualitative or mixed methods research. In the Mac Gabhann (2011)  
57 which explored experiences of Travellers in prison in the UK (18), prison staff completed 296  
58 surveys, while 57 Travellers (of Irish origin), predominantly male (93.6%) participated in  
59  
60

1  
2  
3 focus groups and semi-structured interviews. Almost a quarter (24.6%) of prisoners  
4 reported physical health problems and Travellers reflected negatively on the use of  
5 healthcare prison facilities to manage their health condition.  
6  
7

8  
9  
10 *'I'll never go back to them, they've done nothing for me'.*  
11

12 Murphy (2016) (17) explored the experiences of homelessness for Travellers through  
13 qualitative interviews of 14 Travellers in one county in the Republic of Ireland. They vividly  
14 described the negative impact of homelessness had on their physical health.  
15  
16

17  
18  
19 *'I never had blood pressure in my life. Now, the last year and a half, ever since the*  
20 *time we had to leave (the rented house), I'm taking blood pressure tablets.'*  
21  
22

23 Collateral relevant to family members was also reported.  
24

25  
26 *'My mother is on a breathing machine because she has a sleeping disorder so in the,*  
27 *in the night time if she would knock it off, she goes into her, what's it a coma. And*  
28 *with the sleeping disorder it cut's your oxygen from your throat to your brain, so that*  
29 *leads to a heart attack or a stroke'.*  
30  
31  
32  
33

34  
35 Murphy (2016) also described health problems that participants directly attributed to their  
36 homeless state or living conditions (on a site with no toilet) such as chronic kidney  
37 infections. Limited access to electricity was a problem identified as well as a lack of  
38 refrigeration to store sleeping rough as he had nowhere else to keep it (17).  
39  
40  
41

42  
43 Hodgins et al (2006) explored, through focus groups, perceptions of illness causation and  
44 health inequalities in 41 Traveller women in two regions in Ireland (16). Themes of poor  
45 living conditions, discrimination, stress, anxiety, depression and violence described their  
46 perceptions of the cause of their poor health. Traveller women attributed other health  
47 conditions such as heart disease to the stresses of their life and considered risk factors such  
48 as smoking as less important factors and often beneficial to health status.  
49  
50  
51  
52  
53

54  
55 *'People have a lot of worry, a lot of stresses and can develop heart disease and heart*  
56 *attacks...'*  
57  
58

59 The interaction of poor accommodation and health was also noted.  
60

1  
2  
3                   *“An awful lot of it comes from bad accommodation and discrimination. I keep sayin’*  
4                   *those two words an’ I know well it’s those that are causing’ the most problems.*  
5                   *causin’ heart problems and depression”*  
6  
7  
8  
9  
10

## 11                   **Discussion**

12  
13                   This scoping review appears to be the first-time that data relating to physical health  
14                   conditions of Travellers has been synthesised. Pooling the evidence together underlines two  
15                   key findings. Firstly, the disproportionately high burden of physical health conditions such as  
16                   the metabolic syndrome, asthma, bronchitis, TB and intentional injuries which were 2-3  
17                   times higher in Travellers compared to the background Irish population. Secondly, the  
18                   unique health considerations such as rare genetic diseases experienced by a proportion of  
19                   Travellers and the possibility of health benefits associated with their distinct gut microbiome  
20                   linked to the traditional Traveller way of life.  
21  
22

23  
24                   Over 7,000 Travellers were included in this review with the largest source of data from the  
25                   All-Ireland Traveller Health Study (8). One study took place in England and Wales, while the  
26                   rest of studies were based in Ireland. Living conditions were not specified in the majority of  
27                   studies. This is important to note as living conditions are a key driver of health (34) which is  
28                   rated higher by Travellers when living conditions are better (20).  
29  
30

31  
32                   There was a higher representation of females (61%) within this review. This may be  
33                   explained by findings from the All-Ireland Traveller Health Study highlighting that female  
34                   Travellers were more likely to engage in research studies (8). The majority of participants  
35                   were in their second to fourth decades, which concurs with Central Statistics Office (2016)  
36                   data (5) demonstrating that Travellers are a young population. The paucity of older  
37                   participants means that the effects of ageing and extent of geriatric syndromes in this  
38                   population are not fully known.  
39  
40

41  
42                   This review showed high rates of the metabolic syndrome, CVD risk factors and established  
43                   CVD disease compared to the background population, yet lower self-reported CVD of  
44                   approximately 5.6% (26), versus 16.1% for the general population (33). This likely  
45                   underestimation of CVD among Travellers may be due to a reluctance to divulge information  
46                   and/or a lack of disease awareness, fewer attendances for preventive services as well as late  
47                   and/or a lack of disease awareness, fewer attendances for preventive services as well as late  
48                   and/or a lack of disease awareness, fewer attendances for preventive services as well as late  
49                   and/or a lack of disease awareness, fewer attendances for preventive services as well as late  
50                   and/or a lack of disease awareness, fewer attendances for preventive services as well as late  
51                   and/or a lack of disease awareness, fewer attendances for preventive services as well as late  
52                   and/or a lack of disease awareness, fewer attendances for preventive services as well as late  
53                   and/or a lack of disease awareness, fewer attendances for preventive services as well as late  
54                   and/or a lack of disease awareness, fewer attendances for preventive services as well as late  
55                   and/or a lack of disease awareness, fewer attendances for preventive services as well as late  
56                   and/or a lack of disease awareness, fewer attendances for preventive services as well as late  
57                   and/or a lack of disease awareness, fewer attendances for preventive services as well as late  
58                   and/or a lack of disease awareness, fewer attendances for preventive services as well as late  
59                   and/or a lack of disease awareness, fewer attendances for preventive services as well as late  
60                   and/or a lack of disease awareness, fewer attendances for preventive services as well as late

1  
2  
3 presentation and higher case-fatality rates of CVD(8). Evidently, improved targeted primary  
4 and secondary care strategies for Travellers are required.  
5  
6

7 Respiratory conditions (bronchitis and asthma) were rated as the second most common  
8 physical health condition, with a prevalence of 24.5% among Travellers in the Republic of  
9 Ireland and 35.1% in Northern Ireland (8). This is markedly higher than the comparison  
10 background population of 3% with chronic bronchitis (33) in the Republic of Ireland. Rates of  
11 TB were three-fold higher in Travellers than the white Irish-born population (27). Proposed  
12 risk factors were cited as higher house occupancy, smoking and the presence of diabetes or  
13 pre-diabetes.  
14  
15

16 Travellers suffer a greater burden of injuries and a higher risk of dying from injuries than the  
17 general population (29). Notably, a higher rate of intentional injuries was reported, and a  
18 lower rate of unintentional injuries compared to the general population. The high rate of  
19 intentional injuries likely links to mental health crises among Travellers with a suicide rate  
20 six times the general population (8). The true intentional-injury rates may be in fact higher  
21 as Travellers may not present themselves to care settings for minor injuries, and may be  
22 more inclined to self-treat or present late for care (8). Conversely, there may actually be a  
23 lower unintentional-injury rate due to lower participation in sport and recreational activities  
24 in young Travellers. Travellers over 65 years, however, were twice as likely to be injured,  
25 highlighting their vulnerability. The All-Ireland Traveller Health Study (AITHS) (2010) cited  
26 the home as the most likely location for an injury, which may be due to poor living  
27 environments (8). This is in accordance with a recent report, which highlighted grossly  
28 inadequate living conditions among Travellers (35).  
29  
30

31 This review highlighted genetic conditions such as Type II hyperprolinaemia (31) and  
32 leukoencephalopathy (30). These represent an important factor affecting physical health in  
33 Travellers as autosomal recessive conditions are commonly reported (36). Of note, some  
34 studies (n=5) examining inherited disorders such as congenital atrichia, a rare autosomal  
35 recessive disorder were excluded from this review as they did not meet the age eligibility  
36 criteria. Given that genetic conditions are prevalent in Travellers, consideration of 'grown  
37 up' genetic conditions should be an area of emerging focus.  
38  
39  
40  
41  
42  
43  
44  
45  
46  
47  
48  
49  
50  
51  
52  
53  
54  
55  
56  
57  
58  
59  
60



1  
2  
3 Positive physical health factors linked to the gut, were discussed in two studies (20, 32).  
4  
5 McCormick et al (2001) noted the absence of consultant-diagnosed inflammatory bowel  
6  
7 disease possibly due to exposure to enteric bacteria and infection in early life(32). Keohane  
8  
9 et al (2020) suggested the 'non-industrialised microbiome' of Travellers may be due to living  
10  
11 conditions and animal ownership (20). How the gut microbiome changes with  
12  
13 modernisation should be evaluated in future studies.

14  
15 When comparing Travellers to non-Travellers (35–54 age group), Travellers are  
16  
17 approximately three times as likely to have poor health or some type of difficulty or  
18  
19 disability with the health gap rapidly increasing with age, which mirrors the pattern in other  
20  
21 ethnic minority groups (37). A UK based study found that compared to white British people  
22  
23 and 17 different ethnic minority groups, Gypsy and Irish Travellers (with the exception of  
24  
25 younger and older age groups) had markedly high levels of multiple long-term conditions  
26  
27 (38). Another study found inequalities in health-related quality of life were widest for Gypsy  
28  
29 or Irish Travellers, Pakistani and Bangladeshi women (39).

30  
31 In a similar way to Travellers experiencing a high burden of physical health conditions  
32  
33 compared to the background population, poorer health is experienced by the Roma  
34  
35 population compared to non-Roma across Europe (40). For instance, a high prevalence of TB  
36  
37 has been detected in the Roma population (41). Other diseases have been described in  
38  
39 Roma, such as hepatitis A(42) and hepatitis C virus (HCV) and HIV (43). An outbreak of  
40  
41 Hepatitis A in Travellers was described in the literature (44) but was not included in the  
42  
43 current review due to the high proportion of participants under 18 years. A high prevalence  
44  
45 of measles was documented in Roma (45), a number of papers also described measles  
46  
47 outbreaks in Irish Travellers (46) but similarly were also excluded from the present review  
48  
49 due to the proportion of children in these papers.

50  
51 A strength of this review is the synthesis of data relating to physical health conditions of  
52  
53 Travellers based in England and Wales, Republic of Ireland and Northern Ireland. A further  
54  
55 strength was the active stakeholder involvement by the inclusion of a member of the  
56  
57 Travelling community as an integral and valued member of the review team. This ensured  
58  
59 the real-world relevance of this research and is likely to increase chances of implementation  
60  
of research findings into real life settings (47).

1  
2  
3 There were a number of limitations. As is the general convention in scoping reviews a  
4 formal quality assessment of included studies (11, 12) was not conducted therefore, the  
5 robustness of evidence (12) could not be judged. We acknowledge that definitive  
6 recommendations are not possible and the review must be interpreted in light of this (11,  
7 12). We therefore see this work as a useful accessible summary of the evidence base  
8 regarding physical health conditions in Travellers (11, 48). As previously stated, the initial  
9 intention was to perform a review encompassing physical and mental health conditions,  
10 however, a pragmatic decision was taken to include physical health conditions only which  
11 we acknowledge is somewhat unidimensional as physical and mental health conditions are  
12 inter-related and multi-morbidity can straddle both.  
13  
14  
15  
16  
17  
18  
19  
20  
21

22 The All-Ireland Traveller Health Study (AITHS) which is over 10 years old remains the most  
23 comprehensive report of Traveller health and is quoted widely in subsequent reports. It  
24 highlighted four priority areas for intervention: mother and child services; men's health;  
25 cause-specific issues for respiratory and cardio-vascular disease; and a new model of  
26 primary care delivery. The importance of using a 'social determinants' approach linking  
27 inequalities in healthcare, accommodation, and other factors such as racism and  
28 discrimination to poor health was also advocated(8). With a stark 39% of Travellers  
29 estimated to be homeless, this negatively affects overall health and well-being and  
30 compounds health inequalities (49). The long awaited recently published National Traveller  
31 Health Action Plan (2022) (50), relevant to the Republic of Ireland, contained 45 key actions  
32 around resourcing, identifying, reinstating, and expanding Primary Health Care for Traveller  
33 Projects and engaging with public health. It also echoed a social determinants approach  
34 with targeted and mainstream strategies to overcome inequalities. This was also advocated  
35 in the National Traveller and Roma Inclusion Strategy 2017-2021 (NTRIS) (51). Another  
36 important approach of the National Traveller Health Action Plan is a 'whole-of-government  
37 approach' with integrated cross sectoral working. All of these approaches if implemented  
38 should impact the burden of physical health conditions in Travellers but there is a sense of  
39 policy conflict (52), policy fatigue and policy failure in the absence of tangible action on  
40 previous recommendations.  
41  
42  
43  
44  
45  
46  
47  
48  
49  
50  
51  
52  
53  
54  
55  
56

57 More is known about physical health conditions in Irish-based Travellers and policies  
58 described are relevant to this setting. Less is known specifically about the physical health  
59  
60

1  
2  
3 conditions of UK based Irish Travellers. Some research collectively pooled data from gypsies  
4 and Irish Travellers as well as other Traveller groups. Although all these groups experience  
5 discrimination, poor living conditions and health inequalities, how these groups vary in  
6 relation to physical health conditions is not well known.  
7  
8  
9

10  
11 Ethnic identifiers would enable physical health conditions to be more accurately tracked but  
12 this would need to be conducted sensitively. This is line with a key recommendation of the  
13 National Traveller Health Action Plan (2022-2027) (50), which recommends systematic  
14 ethnic equality monitoring, including the introduction of ethnic identifiers on health data  
15 sets. Due to the inter-relationship between living conditions and health, living conditions  
16 need to be radically improved and studies including Travellers should include data on living  
17 arrangements.  
18  
19  
20  
21  
22  
23

24  
25 It should also be considered that the extent of physical health conditions may be  
26 underestimated due to Travellers not presenting or presenting late for care as well as a  
27 mistrust of healthcare professionals (8). The co-development of trust-building mechanisms  
28 and improved cooperation between Travellers and healthcare professionals has been  
29 recognized as important strategies to improve Travellers' access and engagement with  
30 mainstream health services (53). Non-communicable diseases such as cancer and arthritis in  
31 Travellers featured minimally within this review. The health of older Travellers was not  
32 specifically explored, which may be partly due to the mortality gap. Further work is needed  
33 on how best to build confidence and empower Travellers to self-manage their health  
34 without 'talking at them'. Functional literacy and health literacy levels need to be optimised  
35 while also reducing the stigma associated with accessing healthcare (8). Supporting Traveller  
36 groups to co-design culturally appropriate health literacy resources has been identified as  
37 crucial to improve understanding of pathways to access services and signs and symptoms of  
38 different health conditions (53). Health care staff can be discriminatory in their attitudes  
39 (54) which also needs attention. At a broader level, healthcare service design needs to be  
40 culturally appropriate. A recent study exploring Travellers' views about how existing  
41 healthcare provision could be more responsive to their needs found that employing  
42 members of the community within the health service, embedding an ethos of cultural safety  
43 and humility and delivering Traveller Cultural Awareness Training to healthcare staff would  
44 improve the cultural appropriateness of mainstream health services (53).  
45  
46  
47  
48  
49  
50  
51  
52  
53  
54  
55  
56  
57  
58  
59  
60

1  
2  
3 Ultimately, inequalities in health, relevant to Travellers and other ethnic minority groups  
4 are closely linked to racism and discrimination as well as the social determinants of health  
5 such as housing, education, employment and income which are strongly associated with  
6 poor health (55). These underlying factors therefore need to be tackled to impact health.  
7  
8  
9

## 10 11 **Conclusion**

12  
13 This scoping review highlights marked inequalities in the burden of physical health  
14 conditions experienced by Mincéirí. Many common physical health conditions were 2-3  
15 times more prevalent in Travellers compared to the background population. Multifaceted  
16 and tangible action is required including better targeted approaches and accommodations  
17 within mainstream healthcare, underpinned by a social determinants approach, to bridge  
18 the gap in physical health conditions experienced by this marginalised group.  
19  
20  
21  
22  
23  
24  
25  
26  
27

## 28 **Acknowledgements**

29  
30 We would like to thank Dr. John Gilmore, University College Dublin who provided useful  
31 comments on this work. We would also like to thank excellent 2<sup>nd</sup> year medical students of  
32 the School of Medicine, Trinity College Dublin, who performed a test review in 2021, which  
33 preceded this work (Sinead Cummins, Cliona Sheehy, Eva Perdue, Laura Mc Kenna).  
34  
35  
36  
37

38 **Funding statement:** This research received no specific grant from any funding agency in the  
39 public, commercial or not-for-profit sector.  
40  
41

42 **Competing Interest:** There is no competing interest to consider.  
43  
44  
45  
46  
47

## 48 **Author's contribution**

49  
50 FK; independent data screening, data extraction, data synthesis, drafting of manuscript, AW;  
51 contribution to the development of the design, drafting of manuscript, JV; drafting of  
52 manuscript, DM; generation and refinement of search strategy, JB; conception of original  
53 idea and deigning the study, refinement of search strategy, independent data screening,  
54 data extraction, data synthesis, drafting of manuscript. All authors provided important  
55  
56  
57  
58  
59  
60

1  
2  
3 intellectual contribution and guidance throughout the development of the manuscript. All  
4 authors contributed, edited and approved the final version of this manuscript.  
5  
6

7 **Provenance and peer review:** Not commissioned; externally peer reviewed.  
8  
9

10 **Data sharing statement:** All relevant data are within the paper and supporting material.  
11  
12

13 **Patient consent for publication:** Not required.  
14

15 **Ethics Approval:** This is a review - so does not contain primary data so ethical approval is  
16 not required.  
17  
18

19 Figure Legend

20 Figure 1 PRISMA flow diagram  
21  
22  
23  
24

## 25 References

- 26  
27  
28  
29 1. Ni Shuinear S. In Irish Travellers: Culture and Ethnicity Belfast. Belfast: Institute of Irish  
30 Studies 1996.  
31 2. Binchy A. A Heritage Ahead. Cultural Action and Travellers. . A Heritage Ahead. Dublin:  
32 Pavee Point Publications; 1995. p. 87-93.  
33 3. Gilbert E, Carmi S, Ennis S, Wilson JF, Cavalleri GL. Genomic insights into the population  
34 structure and history of the Irish Travellers. Sci Rep. 2017;7:42187.  
35 4. Cromarty H. Gypsies and Travellers Briefing Paper, House of Commons, Number 08083 2019  
36 [   
37 5. Census 2016 Profile 8 - Irish Travellers, Ethnicity and Religion 2016 [Available from:  
38 [https://www.cso.ie/en/csolatestnews/presspages/2017/census2016profile8-  
39 irishtravellersethnicityandreligion/](https://www.cso.ie/en/csolatestnews/presspages/2017/census2016profile8-irishtravellersethnicityandreligion/).  
40 6. Statement by An Taoiseach Enda Kenny TD on the recognition of Travellers as an ethnic  
41 group, Dáil Éireann, Department of an Taoiseach 2018 [Available from:  
42 [https://www.gov.ie/en/speech/d29014-statement-by-an-taoiseach-enda-kenny-td-on-the-  
43 recognition-of-travel/#](https://www.gov.ie/en/speech/d29014-statement-by-an-taoiseach-enda-kenny-td-on-the-recognition-of-travel/#).  
44 7. McGinnity FG, F. Kenny O, Russell H. . Who experiences discrimination in Ireland? Evidence  
45 from the QNHS Equality Modules, Irish Human Rights and Equality Commission, Economic and Social  
46 Research Institute. Dublin 2017.  
47 8. All Ireland Traveller Health Study: Our Geels, Summary of Findings. All Ireland Traveller  
48 Health Study Team, Dublin: University College Dublin. 2010.  
49 9. McGorrian C, Hamid NA, Fitzpatrick P, Daly L, Malone KM, Kelleher C. Frequent mental  
50 distress (FMD) in Irish Travellers: Discrimination and bereavement negatively influence mental  
51 health in the All Ireland Traveller Health Study. Transcultural Psychiatry. 2013;50(4):559-78.  
52 10. O'Reilly P, Jenkinson A, Martin T, Stone G, Power B, Murphy A. G294(P) Health and disease  
53 in children of the 'Irish traveller' community. Archives of Disease in Childhood. 2018;103(Suppl  
54 1):A120-A.  
55 11. Peters MDG, C. McInerney, P. et al. . Joanna Briggs Institute (JBI) Manual for Evidence  
56 Synthesis 2020.  
57  
58  
59  
60

12. Arksey H, O'Malley L. Scoping studies: towards a methodological framework. *International Journal of Social Research Methodology*. 2005;8(1):19-32.
13. Levac D, Colquhoun H, O'Brien KK. Scoping studies: advancing the methodology. *Implementation Science*. 2010;5(1):69.
14. Tricco AC, Lillie E, Zarin W, O'Brien KK, Colquhoun H, Levac D, et al. PRISMA Extension for Scoping Reviews (PRISMA-ScR): Checklist and Explanation. *Ann Intern Med*. 2018;169(7):467-73.
15. Daudt HML, van Mossel C, Scott SJ. Enhancing the scoping study methodology: a large, inter-professional team's experience with Arksey and O'Malley's framework. *BMC Medical Research Methodology*. 2013;13(1):48.
16. Hodgins M, Millar M, Barry MM. "...it's all the same no matter how much fruit or vegetables or fresh air we get": traveller women's perceptions of illness causation and health inequalities. *Soc Sci Med*. 2006;62(8):1978-90.
17. Murphy N. *Travelling Through Homelessness: A Study of Traveller Homelessness in County Offaly*. Offaly Traveller Movement; 2016.
18. Mac Gabhann C. *Voices Unheard A Study of Irish Travellers in Prison*. Irish Chaplaincy in Britain; 2011.
19. Kelleher CC, Whelan J, Daly L, Fitzpatrick P. Socio-demographic, environmental, lifestyle and psychosocial factors predict self rated health in Irish Travellers, a minority nomadic population. *Health Place*. 2012;18(2):330-8.
20. Keohane DM, Ghosh TS, Jeffery IB, Molloy MG, O'Toole PW, Shanahan F. Microbiome and health implications for ethnic minorities after enforced lifestyle changes. *Nat Med*. 2020;26(7):1089-95.
21. Hodgins M, Millar M, Barry MM. "...it's all the same no matter how much fruit or vegetables or fresh air we get": Traveller women's perceptions of illness causation and health inequalities. *Social Science and Medicine*. 2006;62(8):1978-90.
22. Tan S, Avalos G, Dineen B, Burke A, Gavin J, Brennan M, et al. Traveller health: Prevalence of diabetes, pre diabetes and the metabolic syndrome. *Irish Medical Journal*. 2009;102(6).
23. Slattery D, Brennan M, Canny C, O'Shea P, Dennedy MC, Dunne F. The prevalence of diabetes, pre-diabetes and metabolic syndrome in Irish travellers and the impact of lifestyle modification. *Irish Journal of Medical Science*. 2011;180:S489.
24. Slattery D, Brennan M, Canny C, Sweeney K, Dunne F. The point prevalence of diabetes, pre diabetes and metabolic syndrome in Irish travellers. *Irish Journal of Medical Science*. 2010;179(13):S522.
25. McGorrian C, Daly L, Fitzpatrick P, Moore RG, Turner J, Kelleher CC. Cardiovascular disease and risk factors in an indigenous minority population. The All-Ireland Traveller Health Study. *European Journal of Preventive Cardiology*. 2012;19(6):1444-53.
26. McGorrian CM, Abdalla S, Daly L, Fitzpatrick P, Kelly C, Moore RG, et al. Adverse cardiovascular risk profile in a disadvantaged minority community consistent with the thrifty phenotype hypothesis. Findings from the All-Ireland Traveller Health Study. *European Heart Journal*. 2010;31:238-9.
27. O'Toole RF, Jackson S, Hanway A, O'Donnell J, Comiskey CM, Rogers TR, et al. Tuberculosis incidence in the Irish Traveller population in Ireland from 2002 to 2013. *Epidemiology and Infection*. 2015;143(13):2849-55.
28. Nolan G, Wending B, Smyth E, O'Connor M, Peelo D. Respiratory health in an Irish traveller community. *Irish Journal of Medical Science*. 2017;186:S432-S3.
29. Abdalla S, Kelleher CC, Quirke B, Daly L. Disparities in fatal and non-fatal injuries between Irish travellers and the Irish general population are similar to those of other indigenous minorities: A cross-sectional population-based comparative study. *BMJ Open*. 2013;3(1).
30. Cullinane PW, Lynch SA, Marnane M. Phenotypic Variability in Leukoencephalopathy with Brain Calcifications and Cysts: Case Report of Siblings from an Irish Traveller Family with a Homozygous SNORD118 Mutation. *Journal of Molecular Neuroscience*. 2020;70(9):1354-6.

- 1
- 2
- 3
- 4 31. Flynn MP, Martin m C, Moore PT, Stafford JA, Fleming GA, Phang JM. Type II
- 5 hyperprolinaemia in a pedigree of Irish travellers (nomads). *Archives of Disease in Childhood*.
- 6 1989;64(12):1699-707.
- 7 32. McCormick PA, Manning D. Chronic inflammatory bowel disease and the 'over-clean'
- 8 environment: Rarity in the Irish 'Traveller' community. *Irish Medical Journal*. 2001;94(7):203-4.
- 9 33. Morgan K. SLAN 2007: survey of lifestyle, attitudes and nutrition in Ireland: main report.
- 10 2007.
- 11 34. Abdalla S, Kelleher C, Quirke B, Daly L, All-Ireland Traveller Hlth Study T. Social inequalities in
- 12 health expectancy and the contribution of mortality and morbidity: the case of Irish Travellers.
- 13 *Journal of Public Health*. 2013;35(4):533-40.
- 14 35. Russell H, Provalko, I., Mc Ginnity F., Enright S. . Monitoring adequate housing in Ireland. The
- 15 Economic and Social Research Institute. 2021.
- 16 36. Lynch SA, Crushell E, Byrne N, Gorman K, King M, Irvine A, et al. Cataloguing inherited
- 17 disorders amongst the irish traveller population. *Ulster Medical Journal*. 2018;87(1):54-5.
- 18 37. Watson D, Kenny, O., Mc Ginnity, F. . A Social Portrait of Travellers in Ireland, Research
- 19 Series Number 56. 2017.
- 20 38. Brenda H, Mai S, Catherine LS, Laia B. Ethnic inequalities in age-related patterns of multiple
- 21 long-term conditions in England: analysis of primary care and nationally representative survey data.
- 22 medRxiv. 2022:2022.08.05.22278462.
- 23 39. Watkinson RE, Sutton M, Turner AJ. Ethnic inequalities in health-related quality of life among
- 24 older adults in England: secondary analysis of a national cross-sectional survey. *Lancet Public Health*.
- 25 2021;6(3):e145-e54.
- 26 40. Roma health report, health status of the Roma population. Data collection in the Member
- 27 States of the European Union. . 2014
- 28 41. Casals M, Pila P, Langohr K, Millet JP, Caylà JA. Incidence of infectious diseases and survival
- 29 among the Roma population: a longitudinal cohort study. *Eur J Public Health*. 2012;22(2):262-6.
- 30 42. Arce Arnáez A, Cabello Ballesteros L, Iñigo Martínez J. [Community outbreak of hepatitis A in
- 31 a marginal population. Vaccination for its control and acceptance of the measure]. *Aten Primaria*.
- 32 2007;39(3):139-43.
- 33 43. Teira R, Lizarralde E, Muñoz P, Zubero Z, Baraiaetxaburu J, Santamaría JM. [A cross-sectional
- 34 study on the epidemiological and clinical characteristics of HIV-1 infection in gypsies and in other
- 35 minorities in Bilbao, Northern Spain]. *Med Clin (Barc)*. 2002;119(17):653-6.
- 36 44. Kelly D, O'Hare C, McKeown P, Cianci F, Doyle S. Detection and control of an ongoing
- 37 international outbreak of hepatitis A among the Irish Traveller community beginning September
- 38 2020. *Epidemiol Infect*. 2022;150:1-13.
- 39 45. Rodrigo SG, Calatrava RG, Vicenta Rigo Medrano M, Vidal MA, Martín-Sierra Balibrea M,
- 40 Zarco IH, et al. [Reemergence of measles. Epidemic situation in the Valencian Community during the
- 41 years 2011 and 2012]. *Enferm Infecc Microbiol Clin*. 2014;32 Suppl 1:43-50.
- 42 46. Cohuet S, Bukasa A, Heathcock R, White J, Brown K, Ramsay M, et al. A measles outbreak in
- 43 the Irish traveller ethnic group after attending a funeral in England, March-June 2007. *Epidemiology*
- 44 and *Infection*. 2009;137(12):1759-65.
- 45 47. Concannon TW, Meissner P, Grunbaum JA, McElwee N, Guise JM, Santa J, et al. A new
- 46 taxonomy for stakeholder engagement in patient-centered outcomes research. *J Gen Intern Med*.
- 47 2012;27(8):985-91.
- 48 48. Davis K, Drey N, Gould D. What are scoping studies? A review of the nursing literature. *Int J*
- 49 *Nurs Stud*. 2009;46(10):1386-400.
- 50 49. The Traveller Community and Homelessness Advocacy paper: October 2021. Pavee Point
- 51 Traveller & Roma Centre.
- 52 50. National Traveller Health Action Plan (2022-2027). Working together to improve the health
- 53 experiences and outcomes for Travellers. Department of Health, Ireland. . 2022.
- 54
- 55
- 56
- 57
- 58
- 59
- 60

- 1
- 2
- 3
- 4 51. National Traveller and Roma Inclusion Strategy (NTRIS). 2017-2021. Department of Justice
- 5 and Equality, Ireland. . 2017.
- 6
- 7 52. Implementation of Traveller Policy: Terrain for Imagination and Challenge. May 2022. Pavee
- 8 Point Traveller & Roma Centre. .
- 9
- 10 53. Villani J, Kuosmanen, T., McDonagh, M, Barry, M.M. . Traveller Mental Wellness Continuum
- 11 Framework: A qualitative peer research study of Travellers' views. Health Promotion Research
- 12 Centre, University of Galway.; 2023.
- 13
- 14 54. Gray C, Donnelly J. Unheard voices: the views of traveller and non-traveller mothers and
- 15 children with ASD. International Journal of Early Years Education. 2013;21(4):268-85.
- 16
- 17 55. Williams DR, Yan Y, Jackson JS, Anderson NB. Racial Differences in Physical and Mental
- 18 Health: Socio-economic Status, Stress and Discrimination. J Health Psychol. 1997;2(3):335-51.
- 19
- 20
- 21
- 22
- 23
- 24
- 25
- 26
- 27
- 28
- 29
- 30
- 31
- 32
- 33
- 34
- 35
- 36
- 37
- 38
- 39
- 40
- 41
- 42
- 43
- 44
- 45
- 46
- 47
- 48
- 49
- 50
- 51
- 52
- 53
- 54
- 55
- 56
- 57
- 58
- 59
- 60

For peer review only



PRISMA 2020 flow diagram for new systematic reviews which included searches of databases and registers only

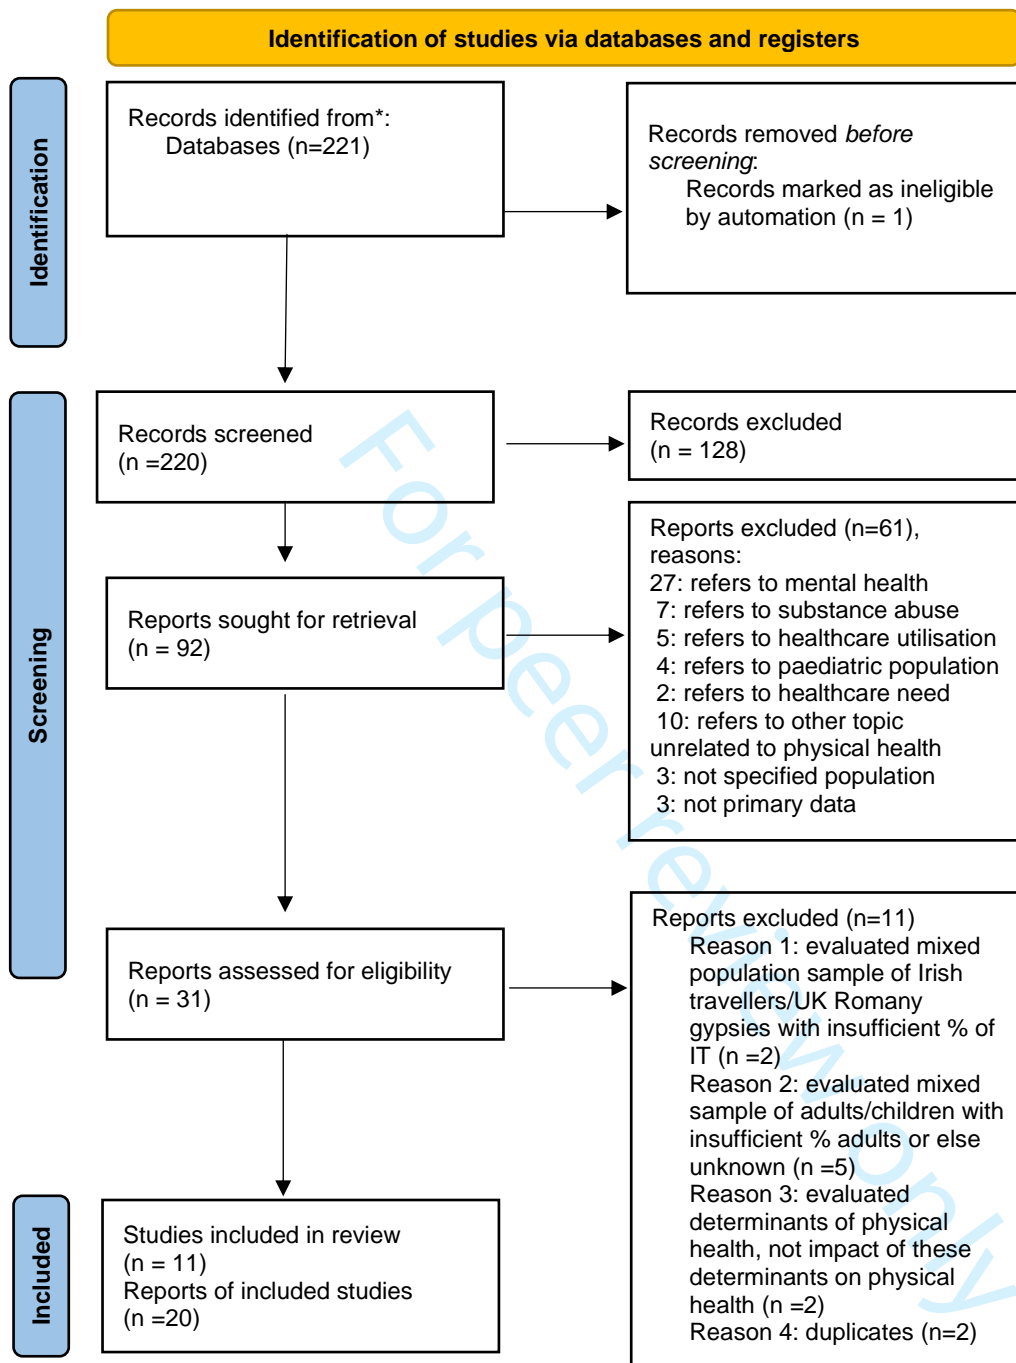

### Supplementary Box 1: Full search details

#### EMBASE

'health'/exp OR 'health status'/exp OR 'mental health'/exp OR 'mental disease'/exp OR 'physical disease'/exp

((Mental\* OR psychological\*) NEAR/2 (condition OR factor\* OR health OR fit OR fitness OR help OR state\* OR status OR well-being OR 'well being' OR stress\* OR distress OR disease\*)):ti,ab  
(depression OR depressed OR addiction\* OR anxiety OR anxious OR delirium OR psychosis OR schizophreni\* ):ti,ab

((physical\*) NEAR/3 (health\* OR fit OR fitness OR well-being OR wellbeing OR status OR ill OR illness)):ti,ab

((cardiac OR cardiovascular OR heart) NEAR/3 (health OR disorder\* or disease\*)):ti,ab  
( 'health study' OR 'health studies'):ti,ab

#1 OR #2 OR #3 OR #4 OR #5 OR #6

((Irish OR Ireland OR Dublin OR limerick OR Waterford OR Galway OR Dublin OR cork) NEAR/3 (traveller\* OR gypsy OR gypsies)):ti,ab

#7 AND #8

#### Medline (OVID)

exp Health/ OR exp Health Status/ OR exp Mental Disorders/ OR exp Chronic Disease/ OR exp Health Behavior/

((Mental\* OR psychological\*) adj2 (condition OR factor\* OR health OR fit OR fitness OR help OR state\* OR status OR well-being OR well being OR stress\* OR distress OR disease\*)).ti,ab.

(depression OR depressed OR addiction\* OR anxiety OR anxious OR delirium OR psychosis OR schizophreni\* ).ti,ab.

((physical\*) adj3 (health\* OR fit OR fitness OR well-being OR wellbeing OR status OR ill OR illness)).ti,ab.

((cardiac OR cardiovascular OR heart) adj3 (health OR disorder\* or disease\*)).ti,ab.  
(health study OR health studies).ti,ab.

or/1-6

((Irish OR Ireland OR Dublin OR limerick OR Waterford OR Galway OR Dublin OR cork) adj3 (traveller\* OR gypsy OR gypsies)).ti,ab.

7 AND 8

#### Web of Science

TS =((((Mental\* OR psychological\*) NEAR/2 (condition OR factor\* OR health OR fit OR fitness OR help OR state\* OR status OR well-being OR "well being" OR stress\* OR distress OR disease\*)) OR (depression OR depressed OR addiction\* OR anxiety OR anxious OR delirium OR psychosis OR schizophreni\*)) OR ((physical\*) NEAR/3 (health\* OR fit OR fitness OR well-being OR wellbeing OR status OR ill OR illness)) OR ((cardiac OR cardiovascular OR heart) NEAR/3 (health OR disorder\* or disease\*)) OR ("health study" OR "health studies")) AND ((Irish OR Ireland OR Dublin OR limerick OR Waterford OR Galway OR Dublin OR cork) NEAR/3 (traveller\* OR gypsy OR gypsies)))

#### GoogleScholar

"Irish travellers|traveller" "mental health|fitness|status|distress" "physical fitness|health|status|illness"

#### CINAHL

(MH "Mental Health") OR (MH "Mental Health Services+") OR (MH "Health Status+") OR (MH "Physical Fitness+") OR (MH "Psychological Well-Being")

TI ((Mental\* OR psychological\*) N2 (condition OR factor\* OR health OR fit OR fitness OR help OR state\* OR status OR well-being OR "well being" OR stress\* OR distress OR disease\*)) OR AB

1  
2  
3  
4 ((Mental\* OR psychological\*) N2 (condition OR factor\* OR health OR fit OR fitness OR help OR  
5 state\* OR status OR well-being OR "well being" OR stress\* OR distress OR disease\*))  
6 TI (depression OR depressed OR addiction\* OR anxiety OR anxious OR delirium OR psychosis OR  
7 schizophreni\*) OR AB (depression OR depressed OR addiction\* OR anxiety OR anxious OR delirium  
8 OR psychosis OR schizophreni\*)  
9 TI ((physical\*) N2 (health\* OR fit OR fitness OR well-being OR wellbeing OR status OR ill OR  
10 illness)) OR AB ((physical\*) N2 (health\* OR fit OR fitness OR well-being OR wellbeing OR status OR  
11 ill OR illness))  
12 TI ((cardiac OR cardiovascular OR heart) N3 (health OR disorder\* or disease\*)) OR AB ((cardiac OR  
13 cardiovascular OR heart) N3 (health OR disorder\* or disease\*))  
14 TI ("health study" OR "health studies") OR AB ("health study" OR "health studies")  
15 S1 OR S2 OR S3 OR S4 OR S5 OR S6  
16  
17 TI ((Irish OR Ireland OR Dublin OR limerick OR Waterford OR Galway OR Dublin OR cork) N3  
18 (traveller\* OR gypsy OR gypsies)) OR AB ((Irish OR Ireland OR Dublin OR limerick OR Waterford OR  
19 Galway OR Dublin OR cork) N3 (traveller\* OR gypsy OR gypsies))  
20 S7 AND S8  
21

### 22 SCOPUS

23  
24 TITLE-ABS-KEY (((Mental\* OR psychological\*) W/2 (condition OR factor\* OR health OR fit OR  
25 fitness OR help OR state\* OR status OR well-being OR "well being" OR stress\* OR distress OR  
26 disease\*)) OR (depression OR depressed OR addiction\* OR anxiety OR anxious OR delirium OR  
27 psychosis OR schizophreni\*) OR ((physical\*) W/3 (health\* OR fit OR fitness OR well-being OR  
28 wellbeing OR status OR ill OR illness)) OR ((cardiac OR cardiovascular OR heart) W/3 (health OR  
29 disorder\* or disease\*)) OR ("health study" OR "health studies")) AND ((Irish OR Ireland OR Dublin  
30 OR limerick OR Waterford OR Galway OR Dublin OR cork) W/3 (traveller\* OR gypsy OR gypsies))  
31  
32

### 33 PsyclINFO

34 DE "Mental Health" OR DE "Health" OR DE "Health Literacy" OR DE "Health Status" OR DE  
35 "Physical Health" OR DE "Health Attitudes" OR DE "Health Behavior" OR DE "Health Risk Behavior"  
36 OR DE "Mental Disorders" OR DE "Chronic Mental Illness"  
37 TI ((Mental\* OR psychological\*) N2 (condition OR factor\* OR health OR fit OR fitness OR help OR  
38 state\* OR status OR well-being OR "well being" OR stress\* OR distress OR disease\*)) OR AB  
39 ((Mental\* OR psychological\*) N2 (condition OR factor\* OR health OR fit OR fitness OR help OR  
40 state\* OR status OR well-being OR "well being" OR stress\* OR distress OR disease\*))  
41 TI (depression OR depressed OR addiction\* OR anxiety OR anxious OR delirium OR psychosis OR  
42 schizophreni\*) OR AB (depression OR depressed OR addiction\* OR anxiety OR anxious OR delirium  
43 OR psychosis OR schizophreni\*)  
44 TI ((physical\*) N2 (health\* OR fit OR fitness OR well-being OR wellbeing OR status OR ill OR  
45 illness)) OR AB ((physical\*) N2 (health\* OR fit OR fitness OR well-being OR wellbeing OR status OR  
46 ill OR illness))  
47  
48 TI ((cardiac OR cardiovascular OR heart) N3 (health OR disorder\* or disease\*)) OR AB ((cardiac OR  
49 cardiovascular OR heart) N3 (health OR disorder\* or disease\*))  
50  
51 TI ("health study" OR "health studies") OR AB ("health study" OR "health studies")  
52 S1 OR S2 OR S3 OR S4 OR S5 OR S6  
53  
54 TI ((Irish OR Ireland OR Dublin OR limerick OR Waterford OR Galway OR Dublin OR cork) N3  
55 (traveller\* OR gypsy OR gypsies)) OR AB ((Irish OR Ireland OR Dublin OR limerick OR Waterford OR  
56 Galway OR Dublin OR cork) N3 (traveller\* OR gypsy OR gypsies))  
57 S7 AND S8  
58  
59  
60

Supplementary Table 1: Study Characteristics

| No | Author(s) and Title                                   | Study Aims & Objectives                                                                                                                                                                                                                                                                                                                                                                                                                     | Research Design               | Living Arrangements                | Location of participants          | Inclusion/Exclusion Criteria      | Data Collection Methods                                                                                           |
|----|-------------------------------------------------------|---------------------------------------------------------------------------------------------------------------------------------------------------------------------------------------------------------------------------------------------------------------------------------------------------------------------------------------------------------------------------------------------------------------------------------------------|-------------------------------|------------------------------------|-----------------------------------|-----------------------------------|-------------------------------------------------------------------------------------------------------------------|
| 1  | <b>The All Ireland Traveller Health Study (AITHS)</b> | <ul style="list-style-type: none"> <li>-To record the number of Travellers on the island of Ireland</li> <li>-To record fertility rate and deaths in one year</li> <li>-To follow a birth cohort for 1 year</li> <li>-To document health status and determine factors affecting the health status of Travellers and their access to health services</li> <li>-To document attitudes/perceptions of Travellers to health services</li> </ul> | Census and quantitative study | Documented in some studies/reports | Island of Ireland North and South | Travellers from island of Ireland | Survey-census section, health status section, health status for children, health services utilisation for adults. |

|     |                                                                                                                                                                                                                                                                                                                                                                                                 |                                                                                                                                            |                                                                                |                                                                                               |                             |                                                                                                                                                              |                                                                                                                                                                                                                                                                                                                                                         |
|-----|-------------------------------------------------------------------------------------------------------------------------------------------------------------------------------------------------------------------------------------------------------------------------------------------------------------------------------------------------------------------------------------------------|--------------------------------------------------------------------------------------------------------------------------------------------|--------------------------------------------------------------------------------|-----------------------------------------------------------------------------------------------|-----------------------------|--------------------------------------------------------------------------------------------------------------------------------------------------------------|---------------------------------------------------------------------------------------------------------------------------------------------------------------------------------------------------------------------------------------------------------------------------------------------------------------------------------------------------------|
| 1.a | <p>Abdalla et al, 2020.</p> <p><b>‘Disparities in fatal and non-fatal injuries between Irish travellers and the Irish general population are similar to those of other indigenous minorities: a cross-sectional population-based comparative study’</b></p>                                                                                                                                     | <p>To assess disparities in fatal and non-fatal injury between travellers and the general population in Ireland</p>                        | <p>Comparative study based on cross-sectional population-based data.</p>       | <p>Not stated</p>                                                                             | <p>ROI</p>                  | <p><u>Inclusion:</u></p> <ul style="list-style-type: none"> <li>-Irish Travellers who participated in the AITHS</li> <li>-Aged 15 years or older.</li> </ul> | <p><i>Traveller data:</i></p> <ul style="list-style-type: none"> <li>-from the AITHS</li> <li>-from the General Register Office</li> <li>-CSO</li> <li>-PHNs working with traveller families.</li> </ul> <p><i>General population data:</i> - from the CSO 2008 report 2006 census and the Survey of Lifestyle, Attitude and Nutrition (SLAN) 2002.</p> |
| 1.b | <p>(i) Kelleher et al, 2012</p> <p><b>Sociodemographic, environmental, lifestyle and psychosocial factors predict self-rated health in Irish Travellers, a minority nomadic population</b></p> <p>(ii) Whelan et al, 2010.</p> <p><b>Socio-demographic, health status, psycho-social and lifestyle predictors of self-rated health in the All-Ireland Traveller Health Study (abstract)</b></p> | <p>Aim: to assess the predictive ability of socio-demographic, environmental, lifestyle and psychosocial factors to self-rated health.</p> | <p>Census survey of Traveller families in Ireland, North and South (AITHS)</p> | <p>75% (n=1547) live in house/apartment</p> <p>25% (n=515) live in caravan/trailer/chalet</p> | <p>ROI/Northern Ireland</p> | <p><u>Inclusion:</u> Self-identified Travellers in the Republic and Northern Ireland</p>                                                                     | <p>Health Status survey: subjective questions around lifestyle, culture, social experiences/supports, health behaviour and self-reported health status.</p>                                                                                                                                                                                             |

|     |                                                                                                                                                                                                                                                                                                                                                                                                                  |                                                                                                                                   |                            |                   |                                                           |                                                                                                                              |                                                                                                                                                    |
|-----|------------------------------------------------------------------------------------------------------------------------------------------------------------------------------------------------------------------------------------------------------------------------------------------------------------------------------------------------------------------------------------------------------------------|-----------------------------------------------------------------------------------------------------------------------------------|----------------------------|-------------------|-----------------------------------------------------------|------------------------------------------------------------------------------------------------------------------------------|----------------------------------------------------------------------------------------------------------------------------------------------------|
|     |                                                                                                                                                                                                                                                                                                                                                                                                                  |                                                                                                                                   |                            |                   |                                                           |                                                                                                                              |                                                                                                                                                    |
| 1.c | <p>(i)Mc Gorrian et al, 2010</p> <p><b>Adverse cardiovascular risk profile in a disadvantaged minority community consistent with the thrifty phenotype hypothesis. Findings from the All-Ireland Traveller Health Study (Abstract)</b></p> <p>(ii) McGorrian et al, 2012</p> <p><b>Cardiovascular disease and risk factors in an indigenous minority population. The All-Ireland Traveller Health Study.</b></p> | <p>Aim: To examine CVD epidemiology and CVD risk factors in Irish Travellers and associations with social disadvantage.</p>       | <p>Observational study</p> | <p>Not stated</p> | <p>A random sample (20%) of participants in the AITHS</p> | <p><u>Inclusion:</u></p> <p>All self-identified Traveller families on the island of Ireland were invited to participate.</p> | <p>AITHS: health survey via an oral-visual data collection instrument</p>                                                                          |
| 2   | <p>Cullinane et al, 2020.</p> <p><b>‘Phenotypic Variability in Leukoencehalopathy with Brain Calcifications and Cysts: Case reports of siblings from an Irish Traveller Family with a Homozygous SNORD118 Mutation’</b></p>                                                                                                                                                                                      | <p>To describe a case report of an Irish traveller with a leukoencephalopathy and an inherited mutation in the SNORD118 gene.</p> | <p>Case report</p>         | <p>Not stated</p> | <p>Not stated</p>                                         | <p><u>Inclusion:</u></p> <p>32 year old female Irish Traveller with leukoencephalopathy.</p>                                 | <p>Clinical examination, family history, medical history including birth history, medications, histopathology investigations, genetic studies.</p> |

|   |                                                                                                                                                                                              |                                                                                                                                              |                        |                                                                                                                                     |            |                                                                                                                                                                        |                                                                                                                                                                                                                                                                                                  |
|---|----------------------------------------------------------------------------------------------------------------------------------------------------------------------------------------------|----------------------------------------------------------------------------------------------------------------------------------------------|------------------------|-------------------------------------------------------------------------------------------------------------------------------------|------------|------------------------------------------------------------------------------------------------------------------------------------------------------------------------|--------------------------------------------------------------------------------------------------------------------------------------------------------------------------------------------------------------------------------------------------------------------------------------------------|
| 3 | Flynn et al, 1989<br><b>Type II Hyperprolinaemia in a pedigree of Irish travellers (nomads)</b>                                                                                              | Aim: not stated but to investigate Type II hyperprolinaemia in Irish Travellers                                                              | Descriptive study      | Not stated                                                                                                                          | Not stated | <b>Inclusion:</b> not clearly stated but family of the 'proband' and close relatives                                                                                   | Testing of urine by two-dimensional paper chromatography, those showing prolinuria had blood samples taken in plain tubes and their serum or plasma proline concentrations were determined on a Locarte amino acid analyser.<br><br>In many cases no urine was collected but a blood sample was. |
| 4 | <b>Hodgins et al, 2006</b><br>“... it's all the same no matter how much fruit or vegetables or fresh air we get”. Traveller women's perceptions of illness causation and health inequalities | Aim: to explore health, ill-health and health inequalities in Traveller women                                                                | Qualitative study      | Not stated                                                                                                                          | Not stated | <b>Inclusion:</b> not explicitly stated but appears to be Traveller women accessing pre-existing community projects or adult education initiatives                     | -response to a vignette in focus groups                                                                                                                                                                                                                                                          |
| 5 | Keohane et al, 2020.<br><b>Microbiome and health implications for ethnic minorities after enforced lifestyle changes.</b>                                                                    | Aim: to investigate whether recent lifestyle changes are associated with differences in the microbiome and risk factors for chronic disease. | Cross-sectional study. | Within 30km radius of Cork city at one of five locations.<br><br>Varied from permanent encampment, halting sites or social housing. | Cork       | <b>Inclusion:</b> None of the participants had taken antibiotics within 1 month and none were taking laxatives, corticosteroids, anti-inflammatories or anticoagulants | - Fecal microbiota of Irish Travellers were collected and compared<br><br>with that of the settled background population in the same geographic locality and with that from individuals in other industrialised and non-industrialised countries.                                                |

1  
2  
3  
4  
5  
6  
7  
8  
9  
10  
11  
12  
13  
14  
15  
16  
17  
18  
19  
20  
21  
22  
23  
24  
25  
26  
27  
28  
29  
30  
31  
32  
33  
34  
35  
36  
37  
38  
39  
40  
41  
42  
43  
44  
45  
46

|   |                                                                                    |                                                            |                     |                                                                                                 |                          |                                                                                                                                                            |                                                                                                                                                                                                                                                                               |
|---|------------------------------------------------------------------------------------|------------------------------------------------------------|---------------------|-------------------------------------------------------------------------------------------------|--------------------------|------------------------------------------------------------------------------------------------------------------------------------------------------------|-------------------------------------------------------------------------------------------------------------------------------------------------------------------------------------------------------------------------------------------------------------------------------|
|   |                                                                                    |                                                            |                     | NB 87% of participants were nomadic in childhood but their living conditions had since changed. |                          |                                                                                                                                                            | <ul style="list-style-type: none"> <li>-Dietary habits were assessed via questionnaire</li> <li>-Body composition was assessed by DXA.</li> <li>-Well-being was assessed by the WHO-5 Well-Being Index</li> <li>-Personal, medical and family history was recorded</li> </ul> |
| 6 | Mac Gabhann, 2011<br><b>Voices Unheard. A study of Irish travellers in Prison.</b> | Aim: to explore issues faced by Irish Travellers in prison | Mixed methods study | England/Wales                                                                                   | Prisons in England/Wales | <u>Inclusion-</u><br>-Irish travellers in prison<br>-prison staff in prisons in England and Wales.<br><br><u>Exclusion</u><br>-Young Offenders Institution | 1.Survey of Irish Travellers across the prison estate and a response form for prison staff involving prison officials and<br><br>2.A series of focus groups and semi-structured interviews with Irish travellers in seven prisons.                                            |



|   |                                                                                                                                                 |                                                                                                                                                                                            |                                   |                                                                                                            |                                                                                             |                                                                                                                                                                                                                                                                                       |                                                                                                                                                                  |
|---|-------------------------------------------------------------------------------------------------------------------------------------------------|--------------------------------------------------------------------------------------------------------------------------------------------------------------------------------------------|-----------------------------------|------------------------------------------------------------------------------------------------------------|---------------------------------------------------------------------------------------------|---------------------------------------------------------------------------------------------------------------------------------------------------------------------------------------------------------------------------------------------------------------------------------------|------------------------------------------------------------------------------------------------------------------------------------------------------------------|
| 7 | McCormick et al, 2001<br><b>Chronic inflammatory bowel disease and the 'over-clean' environment: Rarity in the Irish 'Traveller' community.</b> | Aim: to estimate the prevalence of inflammatory bowel disease in the traveller population.                                                                                                 | Survey                            | N/A                                                                                                        | Study was conducted in 11/26 counties in Ireland where 25/30 gastroenterologists were based | <b>Inclusion:</b> all gastroenterologists or surgeons working in the public health service in Ireland for at least three years at time of study, identified from the Irish Society of Gastroenterology.                                                                               | Collected the number of members of the travelling community ever seen with inflammatory bowel disease and type of disease seen (Crohn's and Ulcerative colitis). |
| 8 | <b>Murphy 2016</b><br><b>Travelling through homelessness: A study of Traveller Homelessness in County Offaly</b>                                | Aim: To explore the experience of homelessness for Travellers in Co. Offaly and to describe how Travellers are accounted for within the definitions of homelessness used at a County level | Qualitative interview-based study | Current living conditions of participants varied but all had experienced homelessness in the previous year | Travellers residing in Co. Offaly                                                           | <b>Inclusion:</b> Member of the Travelling Community, living in County Offaly, or have been living in County Offaly before a movement to emergency/temporary accommodation outside of the country, have experienced homelessness within the previous 12 months, be aged over 18 years | 'Life history interviews' were conducted with participants.                                                                                                      |
| 9 | Nolan et al, 2017<br><b>Respiratory Health in an Irish Traveller Community</b>                                                                  | Aim: to assess respiratory health in Irish Travellers                                                                                                                                      | Observational study               | N/S                                                                                                        | Travellers residing in West Dublin                                                          | <b>Inclusion:</b> Irish Travellers > 18 years                                                                                                                                                                                                                                         | Subjective and objective data collected:<br><br>BMI, smoking history, respiratory symptoms, GP diagnosis of asthma and spirometry measures were taken            |

|    |                                                                                                                                                                                                                                                                                                               |                                                                                                                                                               |                                                 |            |                                                                                                         |                                                                                                                                                                                                                                                               |                                                                                                                                                                                                                                                                                                                                                                                                                |
|----|---------------------------------------------------------------------------------------------------------------------------------------------------------------------------------------------------------------------------------------------------------------------------------------------------------------|---------------------------------------------------------------------------------------------------------------------------------------------------------------|-------------------------------------------------|------------|---------------------------------------------------------------------------------------------------------|---------------------------------------------------------------------------------------------------------------------------------------------------------------------------------------------------------------------------------------------------------------|----------------------------------------------------------------------------------------------------------------------------------------------------------------------------------------------------------------------------------------------------------------------------------------------------------------------------------------------------------------------------------------------------------------|
| 10 | <p>O'Toole et al, 2015.</p> <p><b>Tuberculosis incidence in the Irish Traveller population in Ireland from 2002 to 2013</b></p>                                                                                                                                                                               | <p>To examine data regarding TB notifications in Ireland from 2002 to 2013.</p>                                                                               | <p>Descriptive epidemiologic study</p>          | <p>N/S</p> | <p>N/S</p>                                                                                              | <p><u>Inclusion:</u></p> <ul style="list-style-type: none"> <li>-all cases of TB reported by the National TB Surveillance System and CID,</li> <li>-cases reported in the Census of 2002, 2006 and 2011 and</li> <li>-cases reported by the AITHS.</li> </ul> | <p>Data were collected from National TB Surveillance System and Computerised Infections Disease Reporting system by the Health Surveillance Centre.</p> <p>Crude incidence rates (CIR) were calculated from the CSO and the AITHS data.</p> <p>5 year cumulative CIR values were calculated for 2009-2013.</p> <p>Average incidence rates for 2002-2013 were calculated for each age group using CSO data.</p> |
| 11 | <p>(i)Slattery et al, 2011</p> <p><b>11. a The point prevalence of diabetes, pre-diabetes and metabolic syndrome in Irish travellers</b></p> <p><b>Abstracts</b></p> <p>(ii) Slattery et al, 2011</p> <p><b>11. b The prevalence of diabetes, pre-diabetes and metabolic syndrome in Irish Travellers</b></p> | <p>Aim for all: to evaluate CVD risk factors and the point prevalence of diabetes, pre-diabetes and metabolic syndrome in the Irish Traveller population.</p> | <p>Observational pilot study- abstract only</p> | <p>N/S</p> | <p>Travellers living along 'western seaboard' recruited from Galway and Western Traveller movements</p> | <p>Inclusion: Travellers (&gt;18 years)</p>                                                                                                                                                                                                                   | <p>The following outcomes were evaluated; glucose levels, lipid profiles, oral glucose tolerance tests, blood pressure, weight, height and waist circumference.</p>                                                                                                                                                                                                                                            |

|                         |                                                                                                                                                                                                                                                                                                                                                                                                                                                                                         |  |  |  |  |  |  |
|-------------------------|-----------------------------------------------------------------------------------------------------------------------------------------------------------------------------------------------------------------------------------------------------------------------------------------------------------------------------------------------------------------------------------------------------------------------------------------------------------------------------------------|--|--|--|--|--|--|
| <p>11.c</p> <p>11.d</p> | <p><b>and the impact of lifestyle modification (abstract)</b></p> <p>(iii) Slattery, Brennan, Canny, Sweeney, Ward, O’ Shea and Dunne</p> <p><b>Cardiovascular health in the Irish Traveller community</b></p> <p>(iv) Slattery et al, 2011</p> <p><b>The prevalence of diabetes, Pre-diabetes and the Metabolic Syndrome in Irish Travellers</b></p> <p>Tan et al, 2009</p> <p><b>Traveller Health: Prevalence of Diabetes, Pre-Diabetes and the Metabolic Syndrome (abstract)</b></p> |  |  |  |  |  |  |
|-------------------------|-----------------------------------------------------------------------------------------------------------------------------------------------------------------------------------------------------------------------------------------------------------------------------------------------------------------------------------------------------------------------------------------------------------------------------------------------------------------------------------------|--|--|--|--|--|--|

For peer review only

1  
2  
3  
4  
5  
6  
7  
8  
9  
10  
11  
12  
13  
14  
15  
16  
17  
18  
19  
20  
21  
22  
23  
24  
25  
26  
27  
28  
29  
30  
31  
32  
33  
34  
35  
36  
37  
38  
39  
40  
41  
42  
43  
44  
45  
46

Supplementary Table 2: Details of Study Participants

| No | Author                                                             | Number of Participants                                                                                           | Age (Mean + SD)                                                                                               | Biological Sex                                                  |
|----|--------------------------------------------------------------------|------------------------------------------------------------------------------------------------------------------|---------------------------------------------------------------------------------------------------------------|-----------------------------------------------------------------|
| 1  | AITHS                                                              | 4,141 adults interviewed                                                                                         | 5-14 years: 26%<br>15-24 years: 21%<br>25-39 years: 21%<br>40-64 years: 13%<br>65 years+: 3%                  | Males: 1,817, Females: 2,324                                    |
| 1a | Abdalla et al, 2013                                                | Non-fatal injury data in Travellers: n = 1663 Travellers                                                         | Aged 15 years +                                                                                               | Males = 702 (42%), Females = 961 (58%)                          |
| 1b | Whelan et al, 2010 (abstract)<br>Kelleher et al 2012               | n= 2065                                                                                                          | <30 years: 48% (n=945)<br>30-44: 28.6% (n=563)<br>45-64: 18.4% (n=362)<br>>65: 5.1% (n=100)                   | Males: 43.5% (n=898), Females: 56.5% (n=1166)                   |
| 1c | (i) McGorrian et al, 2010 (abstract)<br>(ii) McGorrian et al, 2012 | 2023<br>Age, sex and CVD data was available on 1878 of the total sample of 2023<br>Comparator population: 10,364 | 18-29: 41.8% (n=784)<br>30-34: 31.6% (n=594)<br>45-59: 18% (n=338)<br>60-74: 7.5% (n=140)<br>>75: 1.2% (n=22) | Traveller population: Males: 32% (n=601), Females: 68% (n=1277) |

|   |                                    |                                                                                                                                         |                                                                                                                      |                                                                                                        |
|---|------------------------------------|-----------------------------------------------------------------------------------------------------------------------------------------|----------------------------------------------------------------------------------------------------------------------|--------------------------------------------------------------------------------------------------------|
| 2 | Cullinane, Lynch and Marnane, 2020 | 1                                                                                                                                       | 32 years                                                                                                             | Female                                                                                                 |
| 3 | Flynn et al 2020                   | *Whole sample: 312<br>Urine from 280, blood from 147.<br>Adult sample with Type II hyperprolinaemia: 7                                  | *Not stated for whole sample, but among 7 adults with Type II hyperprolinaemia the mean age was 27.9 years           | *Not stated for whole sample, but among 7 adults with Type II hyperprolinaemia, 4 females and 3 males. |
| 4 | Hodgkins et al, 2006               | 41                                                                                                                                      | Age range:<br>15-19 years: 15%<br>20-29 years: 51%<br>30-39 years: 20%<br>>40 years: 14%                             | All female                                                                                             |
| 5 | Keohane et al, 2020                | 118                                                                                                                                     | 39 (+/-13 years sd)                                                                                                  | Males =53(44.9%), Females = 65 (55.1%)                                                                 |
| 6 | Mac Gabhann, C, 2011               | 453 (0.6% of prison population). Of this, 296 survey forms were completed.<br>57 travellers participated in the focus groups/interviews | Age range of IT prisoners:<br>20-30: 39.5%<br>30-40: 29.5%<br>40-50: 17.1%<br>15-20:8.5%<br>50-60:4.3%<br>60-70:1.1% | Male = 93.6%, female = 6.4%<br>1 female prison was visited out of 7 in total.                          |

1  
2  
3  
4  
5  
6  
7  
8  
9  
10  
11  
12  
13  
14  
15  
16  
17  
18  
19  
20  
21  
22  
23  
24  
25  
26  
27  
28  
29  
30  
31  
32  
33  
34  
35  
36  
37  
38  
39  
40  
41  
42  
43  
44  
45  
46

|    |                             |      |                                                                                                                                                                                                                                                                                                                                                  |                        |
|----|-----------------------------|------|--------------------------------------------------------------------------------------------------------------------------------------------------------------------------------------------------------------------------------------------------------------------------------------------------------------------------------------------------|------------------------|
| 7  | McCormick and Manning, 2001 | 25   | N/S                                                                                                                                                                                                                                                                                                                                              | N/S                    |
| 8  | Murphy, 2016                | 14   | N/S                                                                                                                                                                                                                                                                                                                                              | N/S                    |
| 9  | Nolan et al, 2017           | 35   | Mean age 44 years (18-69)                                                                                                                                                                                                                                                                                                                        | Males: 16; Females: 19 |
| 10 | McCormick and Manning, 2001 | 25   | N/S                                                                                                                                                                                                                                                                                                                                              | N/S                    |
| 11 | O' Toole et al, 2015        | 2060 | <p>Travellers: majority of cases were in 0-34 yrs age group (mean of 26 years, median of 24 years)</p> <p>General population: majority of cases were in the 25 to &gt; 65 years age group (mean of 43 years, median of 38 years)</p> <p>Irish-born: majority of cases in 55 to &gt;65 years age group (mean of 49 years, median of 49 years)</p> | N/S                    |

|                                                                                                                                                                                                                                                                         |           |                                                                                          |                                                                                                                                                       |                       |                          |
|-------------------------------------------------------------------------------------------------------------------------------------------------------------------------------------------------------------------------------------------------------------------------|-----------|------------------------------------------------------------------------------------------|-------------------------------------------------------------------------------------------------------------------------------------------------------|-----------------------|--------------------------|
| 1<br>2<br>3<br>4<br>5<br>6<br>7<br>8<br>9<br>10<br>11<br>12<br>13<br>14<br>15<br>16<br>17<br>18<br>19<br>20<br>21<br>22<br>23<br>24<br>25<br>26<br>27<br>28<br>29<br>30<br>31<br>32<br>33<br>34<br>35<br>36<br>37<br>38<br>39<br>40<br>41<br>42<br>43<br>44<br>45<br>46 | <b>12</b> | Slattery et al. 2011<br><br>5 reports:<br><br>Tan et al, 2009, Slattery et al 2010, 2011 | 354 travellers were screened in the largest study<br><br>( <i>Tan et al, n=47; Slattery 2010, n=187; Slattery 2011, n=285; Slattery 2011, n=353</i> ) | Mean age 37 ± 11 (SD) | Males: 127; Females: 227 |
|-------------------------------------------------------------------------------------------------------------------------------------------------------------------------------------------------------------------------------------------------------------------------|-----------|------------------------------------------------------------------------------------------|-------------------------------------------------------------------------------------------------------------------------------------------------------|-----------------------|--------------------------|

N/S: not stated

## Preferred Reporting Items for Systematic reviews and Meta-Analyses extension for Scoping Reviews (PRISMA-ScR) Checklist

| SECTION                           | ITEM | PRISMA-ScR CHECKLIST ITEM                                                                                                                                                                                                                                                                                  | REPORTED ON PAGE #                 |
|-----------------------------------|------|------------------------------------------------------------------------------------------------------------------------------------------------------------------------------------------------------------------------------------------------------------------------------------------------------------|------------------------------------|
| <b>TITLE</b>                      |      |                                                                                                                                                                                                                                                                                                            |                                    |
| Title                             | 1    | Identify the report as a scoping review.                                                                                                                                                                                                                                                                   | Page 1                             |
| <b>ABSTRACT</b>                   |      |                                                                                                                                                                                                                                                                                                            |                                    |
| Structured summary                | 2    | Provide a structured summary that includes (as applicable): background, objectives, eligibility criteria, sources of evidence, charting methods, results, and conclusions that relate to the review questions and objectives.                                                                              | Page 1                             |
| <b>INTRODUCTION</b>               |      |                                                                                                                                                                                                                                                                                                            |                                    |
| Rationale                         | 3    | Describe the rationale for the review in the context of what is already known. Explain why the review questions/objectives lend themselves to a scoping review approach.                                                                                                                                   | Page 3                             |
| Objectives                        | 4    | Provide an explicit statement of the questions and objectives being addressed with reference to their key elements (e.g., population or participants, concepts, and context) or other relevant key elements used to conceptualize the review questions and/or objectives.                                  | Page 4                             |
| <b>METHODS</b>                    |      |                                                                                                                                                                                                                                                                                                            |                                    |
| Protocol and registration         | 5    | Indicate whether a review protocol exists; state if and where it can be accessed (e.g., a Web address); and if available, provide registration information, including the registration number.                                                                                                             | Not applicable                     |
| Eligibility criteria              | 6    | Specify characteristics of the sources of evidence used as eligibility criteria (e.g., years considered, language, and publication status), and provide a rationale.                                                                                                                                       | Page 4                             |
| Information sources*              | 7    | Describe all information sources in the search (e.g., databases with dates of coverage and contact with authors to identify additional sources), as well as the date the most recent search was executed.                                                                                                  | Page 4                             |
| Search                            | 8    | Present the full electronic search strategy for at least 1 database, including any limits used, such that it could be repeated.                                                                                                                                                                            | Supplementary file 1/Extended data |
| Selection of sources of evidence† | 9    | State the process for selecting sources of evidence (i.e., screening and eligibility) included in the scoping review.                                                                                                                                                                                      | Page 4                             |
| Data charting process‡            | 10   | Describe the methods of charting data from the included sources of evidence (e.g., calibrated forms or forms that have been tested by the team before their use, and whether data charting was done independently or in duplicate) and any processes for obtaining and confirming data from investigators. | Page 4                             |
| Data items                        | 11   | List and define all variables for which data were sought and any assumptions and simplifications made.                                                                                                                                                                                                     | Page 4                             |
| Critical appraisal of individual  | 12   | If done, provide a rationale for conducting a critical appraisal of included sources of evidence; describe                                                                                                                                                                                                 | Not applicable                     |

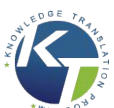



| SECTION                                       | ITEM | PRISMA-ScR CHECKLIST ITEM                                                                                                                                                                       | REPORTED ON PAGE #  |
|-----------------------------------------------|------|-------------------------------------------------------------------------------------------------------------------------------------------------------------------------------------------------|---------------------|
| sources of evidence§                          |      | the methods used and how this information was used in any data synthesis (if appropriate).                                                                                                      |                     |
| Synthesis of results                          | 13   | Describe the methods of handling and summarizing the data that were charted.                                                                                                                    | Page 5              |
| <b>RESULTS</b>                                |      |                                                                                                                                                                                                 |                     |
| Selection of sources of evidence              | 14   | Give numbers of sources of evidence screened, assessed for eligibility, and included in the review, with reasons for exclusions at each stage, ideally using a flow diagram.                    | Fig. 1              |
| Characteristics of sources of evidence        | 15   | For each source of evidence, present characteristics for which data were charted and provide the citations.                                                                                     | Tables              |
| Critical appraisal within sources of evidence | 16   | If done, present data on critical appraisal of included sources of evidence (see item 12).                                                                                                      | Not applicable      |
| Results of individual sources of evidence     | 17   | For each included source of evidence, present the relevant data that were charted that relate to the review questions and objectives.                                                           | Tables and page 5-6 |
| Synthesis of results                          | 18   | Summarize and/or present the charting results as they relate to the review questions and objectives.                                                                                            | Pages 5-6           |
| <b>DISCUSSION</b>                             |      |                                                                                                                                                                                                 |                     |
| Summary of evidence                           | 19   | Summarize the main results (including an overview of concepts, themes, and types of evidence available), link to the review questions and objectives, and consider the relevance to key groups. | Page 7              |
| Limitations                                   | 20   | Discuss the limitations of the scoping review process.                                                                                                                                          | Page 9              |
| Conclusions                                   | 21   | Provide a general interpretation of the results with respect to the review questions and objectives, as well as potential implications and/or next steps.                                       | Page 10             |
| <b>FUNDING</b>                                |      |                                                                                                                                                                                                 |                     |
| Funding                                       | 22   | Describe sources of funding for the included sources of evidence, as well as sources of funding for the scoping review. Describe the role of the funders of the scoping review.                 | Page 10             |

JBI = Joanna Briggs Institute; PRISMA-ScR = Preferred Reporting Items for Systematic reviews and Meta-Analyses extension for Scoping Reviews.

\* Where *sources of evidence* (see second footnote) are compiled from, such as bibliographic databases, social media platforms, and Web sites.

† A more inclusive/heterogeneous term used to account for the different types of evidence or data sources (e.g., quantitative and/or qualitative research, expert opinion, and policy documents) that may be eligible in a scoping review as opposed to only studies. This is not to be confused with *information sources* (see first footnote).

‡ The frameworks by Arksey and O'Malley (6) and Levac and colleagues (7) and the JBI guidance (4, 5) refer to the process of data extraction in a scoping review as data charting.

§ The process of systematically examining research evidence to assess its validity, results, and relevance before using it to inform a decision. This term is used for items 12 and 19 instead of "risk of bias" (which is more applicable to systematic reviews of interventions) to include and acknowledge the various sources of evidence that may be used in a scoping review (e.g., quantitative and/or qualitative research, expert opinion, and policy document).

From: Tricco AC, Lillie E, Zarin W, O'Brien KK, Colquhoun H, Levac D, et al. PRISMA Extension for Scoping Reviews (PRISMA-ScR): Checklist and Explanation. *Ann Intern Med.* 2018;169:467–473. doi: 10.7326/M18-0850.



St. Michael's

Inspired Care.  
Inspiring Science.

For peer review only - <http://bmjopen.bmj.com/site/about/guidelines.xhtml>
